# Supplementary material for: Plasmodium falciparum subtilisin-like protease 1: discovery of potent difluorostatone-based inhibitors
Source: Royal Society of Chemistry journal article supplement (doi:10.1039/c5ra01170a), 2015-01-01

## SUPPORTING INFORMATION

### **Plasmodium falciparum Subtilisin-like Protease 1: Discovery of Potent Difluorostatone-based Inhibitors**

S. Giovani,<sup>a,b,c,†</sup> M. Penzo,<sup>d,†</sup> S. Butini,<sup>a,b,c</sup> M. Brindisi,<sup>a,b,c</sup> S. Gemma,<sup>a,b,c,\*</sup> E. Novellino,<sup>a,e</sup> G. Campiani,<sup>a,b,c,\*</sup>,  
M. J. Blackman,<sup>d</sup> S. Brogi<sup>a,b,c</sup>

<sup>a</sup>*European Research Centre for Drug Discovery and Development (NatSynDrug), University of Siena, via Aldo Moro 2, 53100, Siena, Italy.*

<sup>b</sup>*Dept. Biotechnology, Chemistry, and Pharmacy, University of Siena, via Aldo Moro 2, 53100, Siena, Italy.*

<sup>c</sup>*Centro Interuniversitario di Ricerche sulla Malaria (CIRM), University of Perugia, Perugia, Italy.*

<sup>d</sup>*Division of Parasitology, MRC National Institute for Medical Research, Mill Hill, London, NW7 1AA, UK*

<sup>e</sup>*Dip. di Farmacia, University of Naples Federico II, Via D. Montesano 49, 80131 Naples, Italy*

#### **Table of Contents**

|                                  |    |
|----------------------------------|----|
| <b>Figure S1</b>                 | S2 |
| <b>Figure S2</b>                 | S2 |
| <b>Figure S3</b>                 | S3 |
| <b>Figure S4</b>                 | S3 |
| <b>Figure S5</b>                 | S4 |
| <b><sup>1</sup>H NMR spectra</b> | S5 |

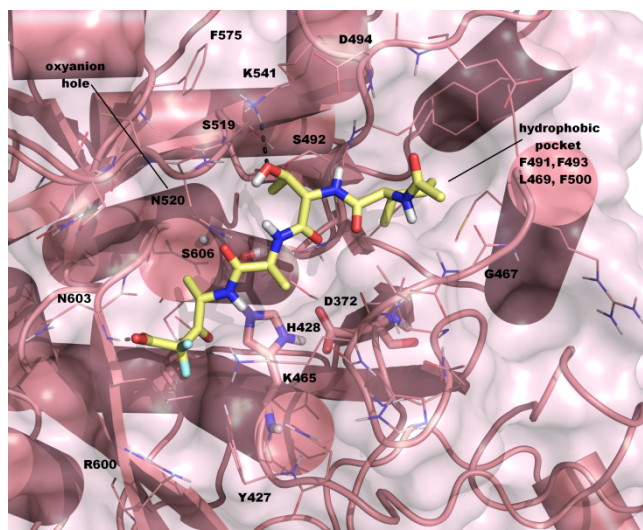

**Figure S1.** Docked pose of **3** (light yellow sticks) in the cavity of the PfSUB1 (PDB ID: 4LVN). H-bonds are indicated by black dotted lines. The catalytic triad is represented by salmon sticks while the other residues in the binding site were represented by lines. Molecular graphics were generated by PyMOL (The PyMOL Molecular Graphics System, v1.6-alpha; Schrodinger LLC: New York, 2013). Nonpolar hydrogens were omitted for clarity.

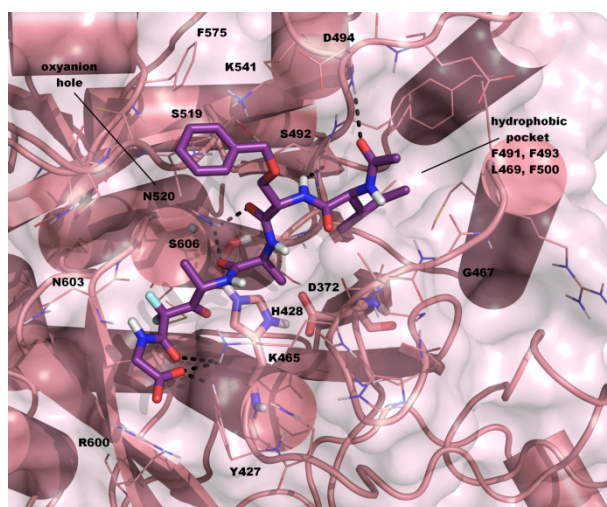

**Figure S2.** Docked pose of **9** (light yellow sticks) in the cavity of the PfSUB1 (PDB ID: 4LVN). H-bonds are indicated by black dotted lines. Catalytic triad is represented by salmon sticks while the other residues in the binding site were represented by lines. Molecular graphics were generated by PyMOL (The PyMOL Molecular Graphics System, v1.6-alpha; Schrodinger LLC: New York, 2013). Nonpolar hydrogens were omitted for clarity.

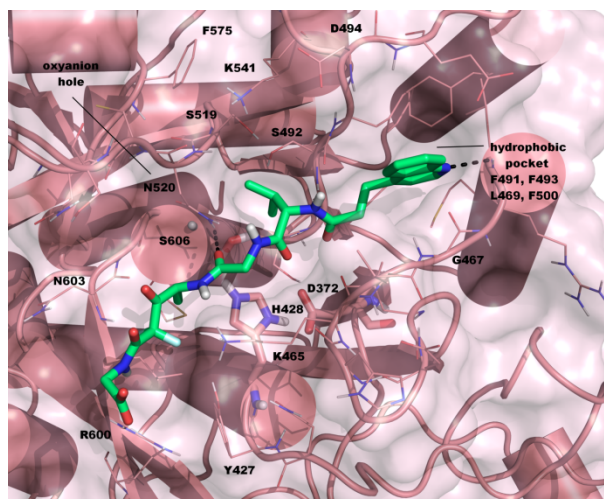

**Figure S3.** Docked pose of **17** (light green sticks) in its neutral state, in the cavity of the PfSUB1 (PDB ID: 4LVN). H-bonds are indicated by black dotted lines. Catalytic triad is represented by salmon sticks while the other residues in the binding site were represented by lines. Molecular graphics were generated by PyMOL (The PyMOL Molecular Graphics System, v1.6-alpha; Schrodinger LLC: New York, 2013). Nonpolar hydrogens were omitted for clarity.

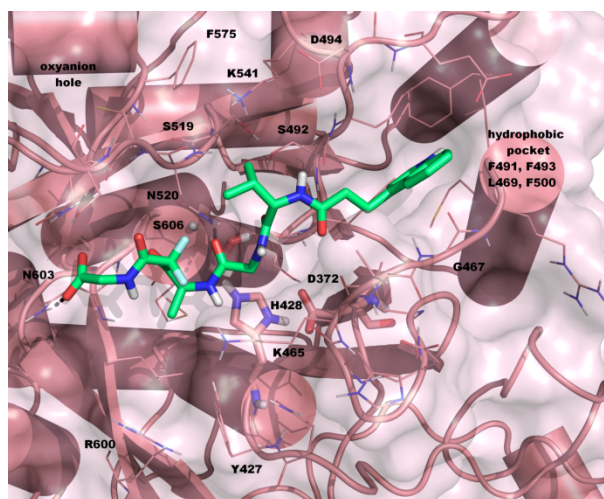

**Figure S4.** Docked pose of **17** (light green sticks) in its protonated state, in the cavity of the PfSUB1 (PDB ID: 4LVN). H-bonds are indicated by black dotted lines. Catalytic triad is represented by salmon sticks while the other residues in the binding site were represented by lines. Molecular graphics were generated by PyMOL (The PyMOL Molecular Graphics System, v1.6-alpha; Schrodinger LLC: New York, 2013). Nonpolar hydrogens were omitted for clarity.

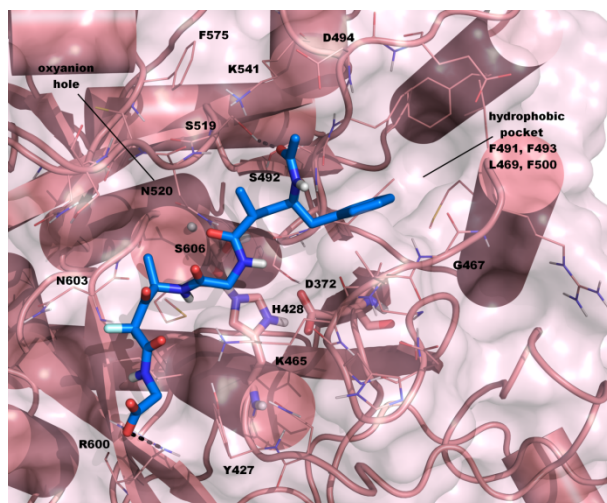

**Figure S5.** Docked pose of **18** (blue sticks) in the cavity of the PfSUB1 (PDB ID: 4LVN). H-bonds are indicated by black dotted lines. Catalytic triad is represented by salmon sticks while the other residues in the binding site were represented by lines. Accordingly, the Goldscore value is 67.34, while the  $\Delta G_{\text{bind}}$  is -71.95 kcal/mol. Molecular graphics were generated by PyMOL (The PyMOL Molecular Graphics System, v1.6-alpha; Schrodinger LLC: New York, 2013). Nonpolar hydrogens were omitted for clarity.

# <sup>1</sup>H NMR spectra

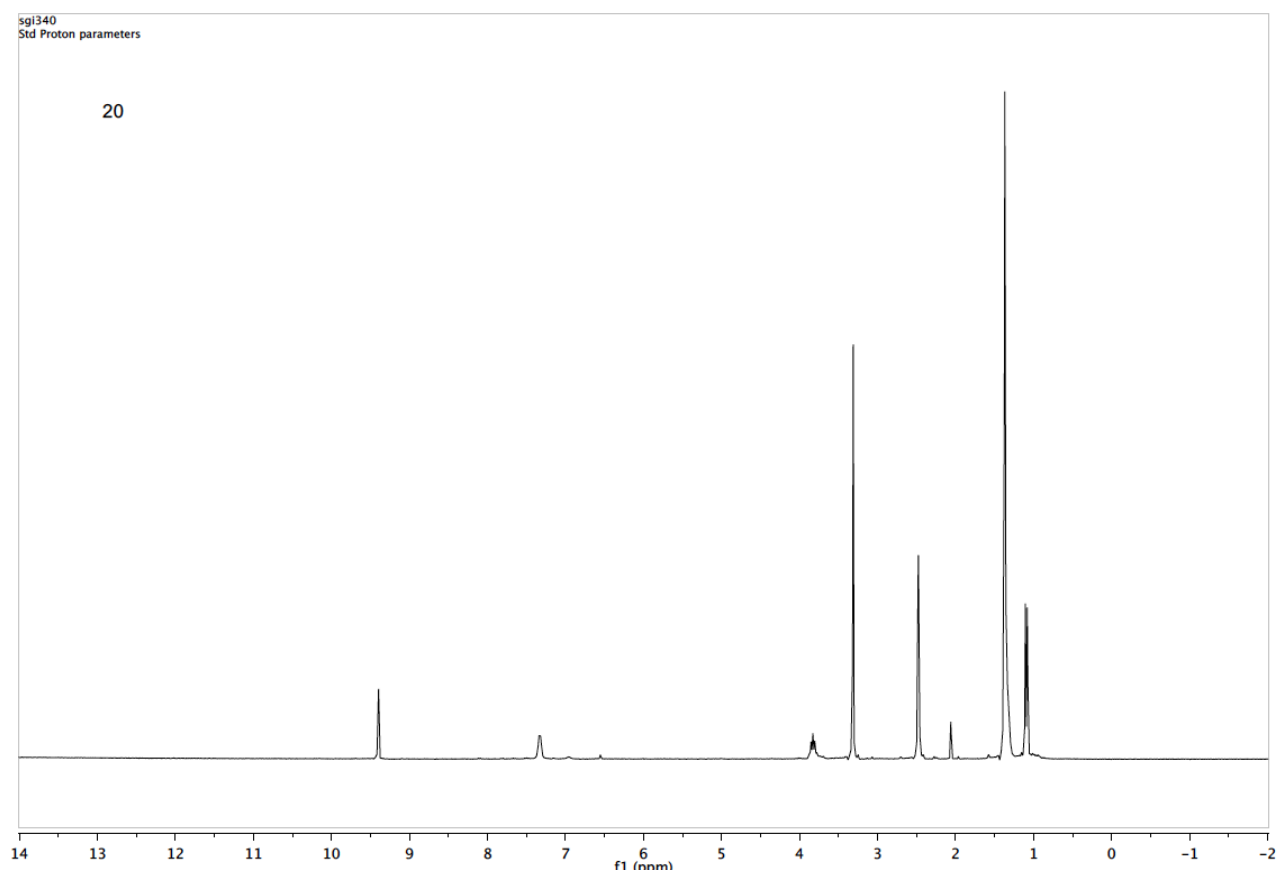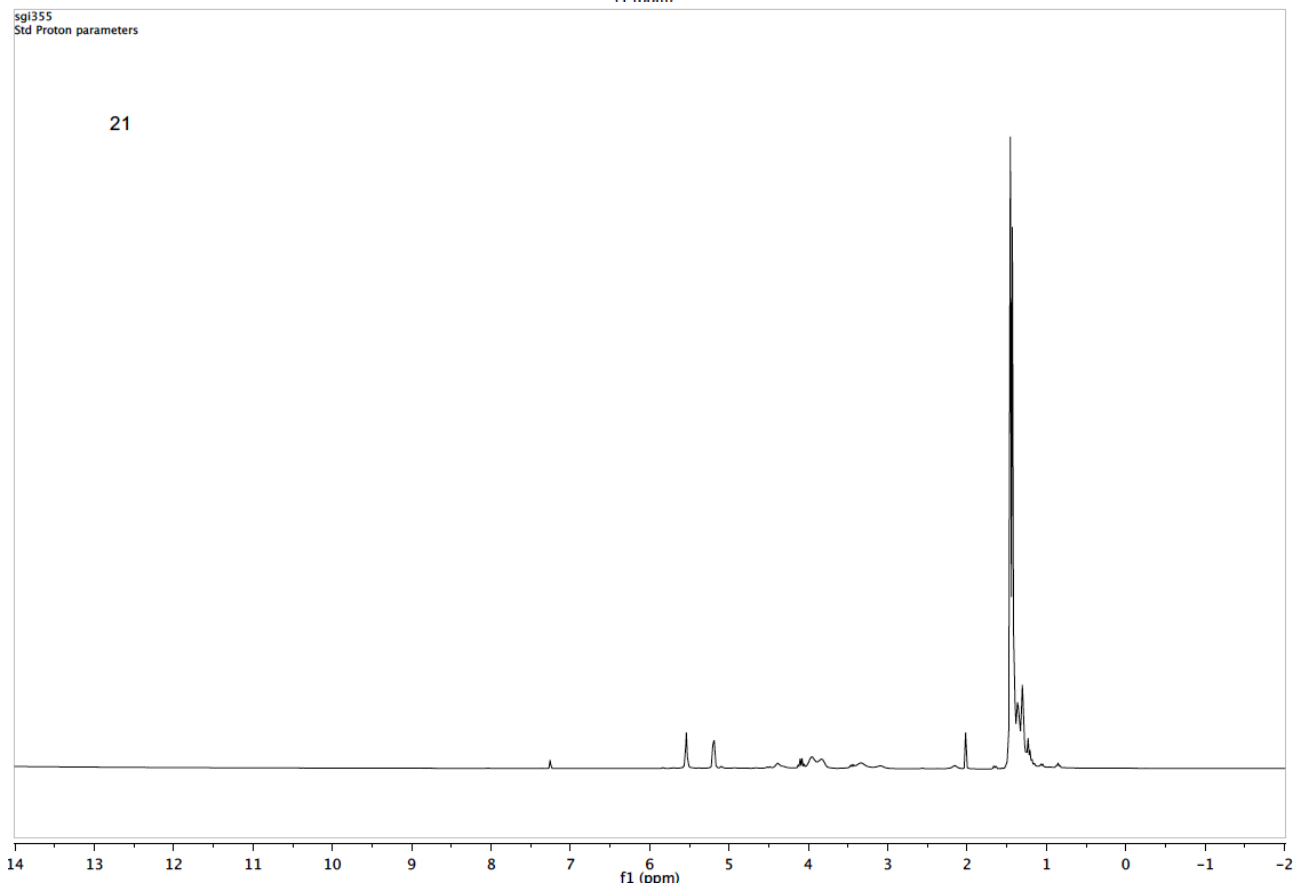

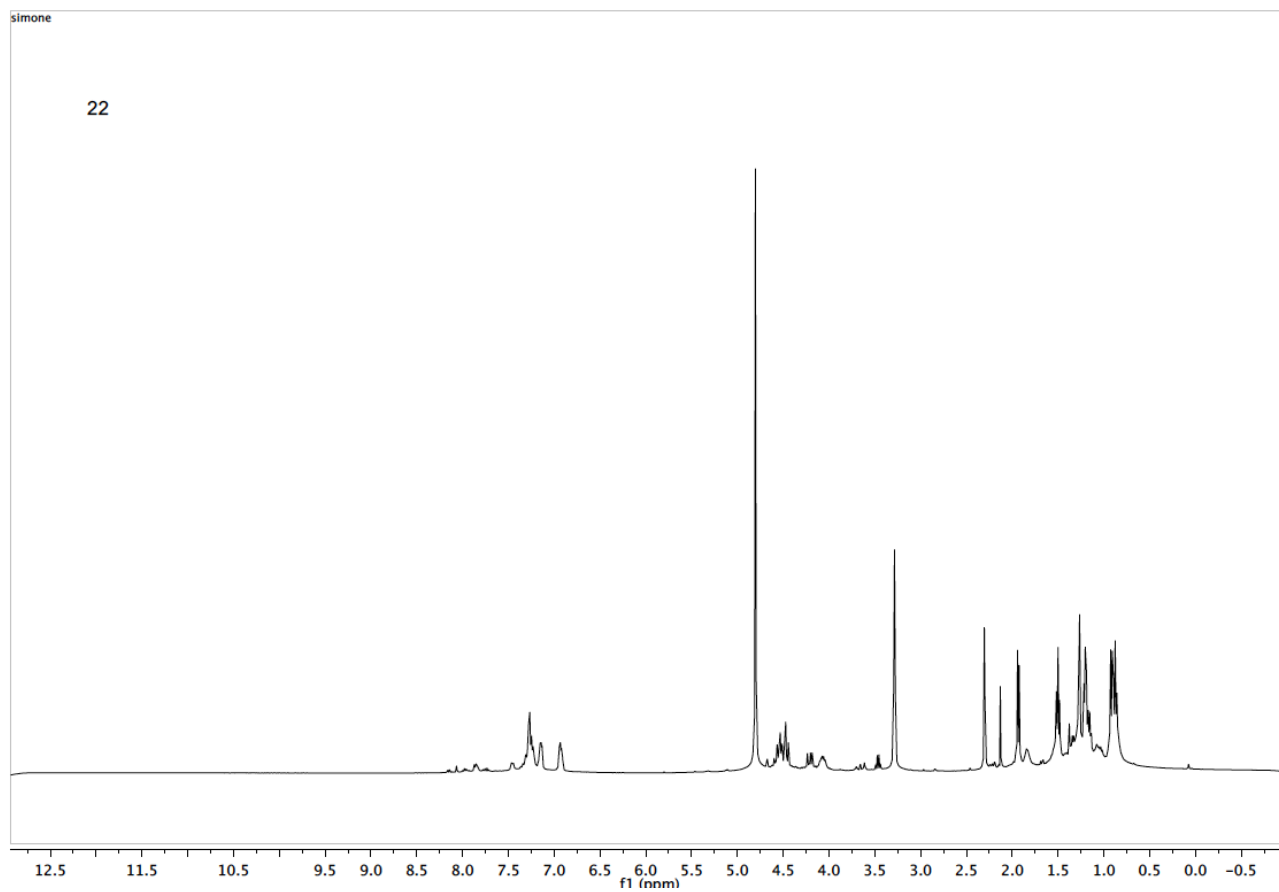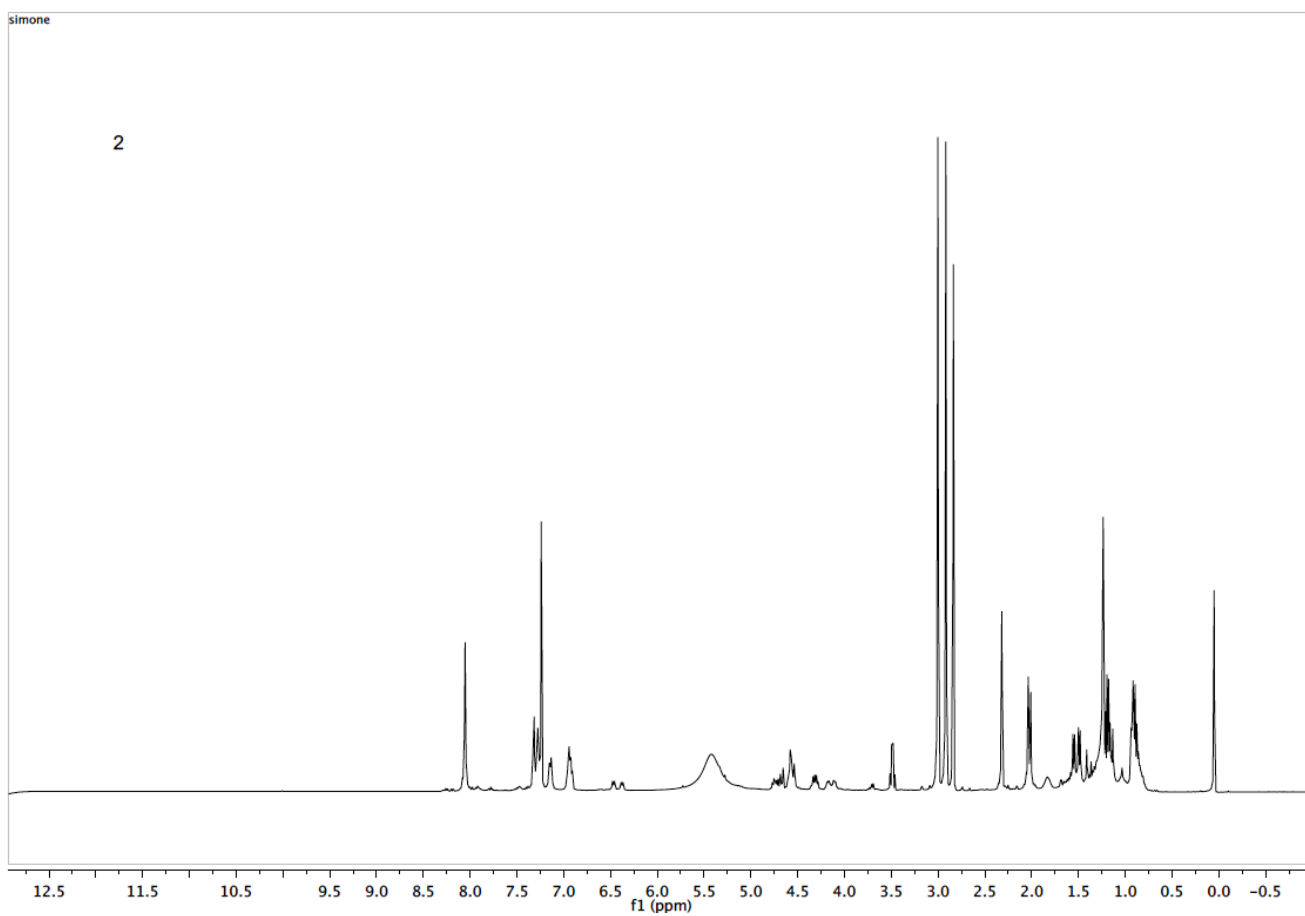

sgl287  
Std Proton parameters

23

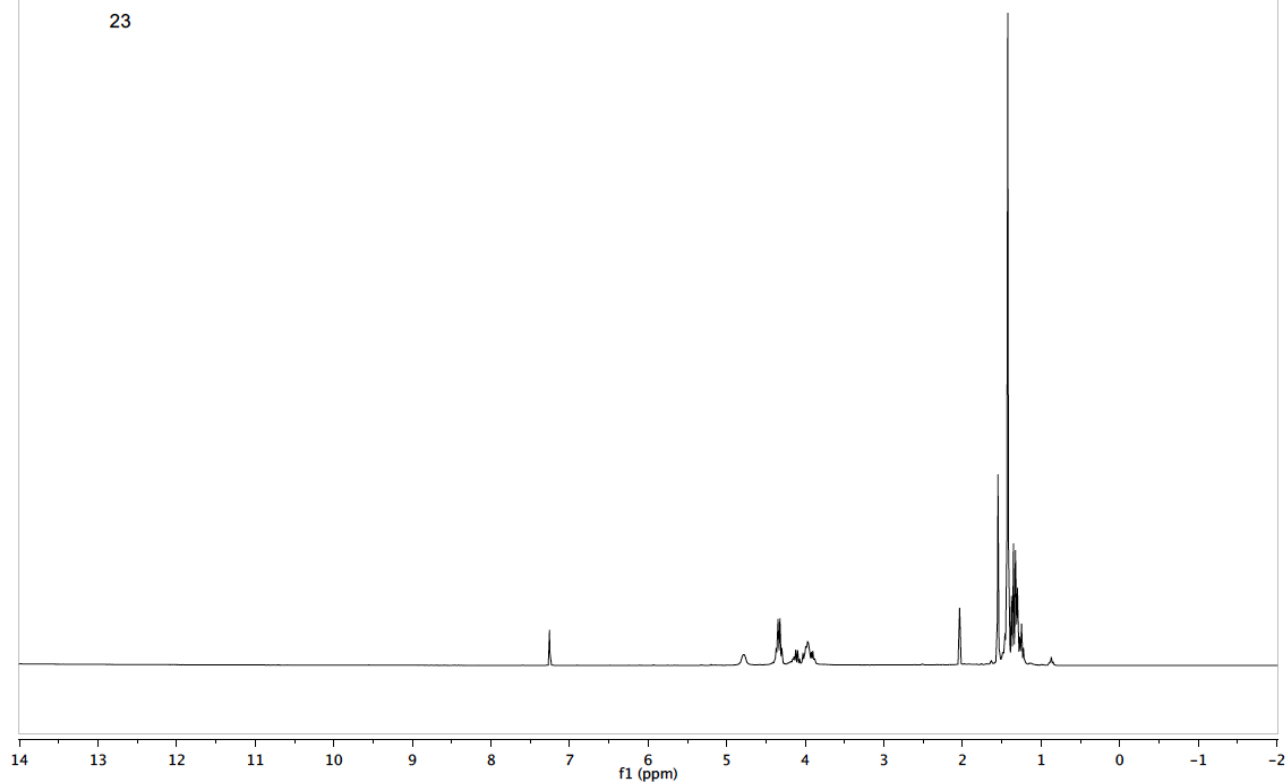

sgl354  
Std Proton parameters

24

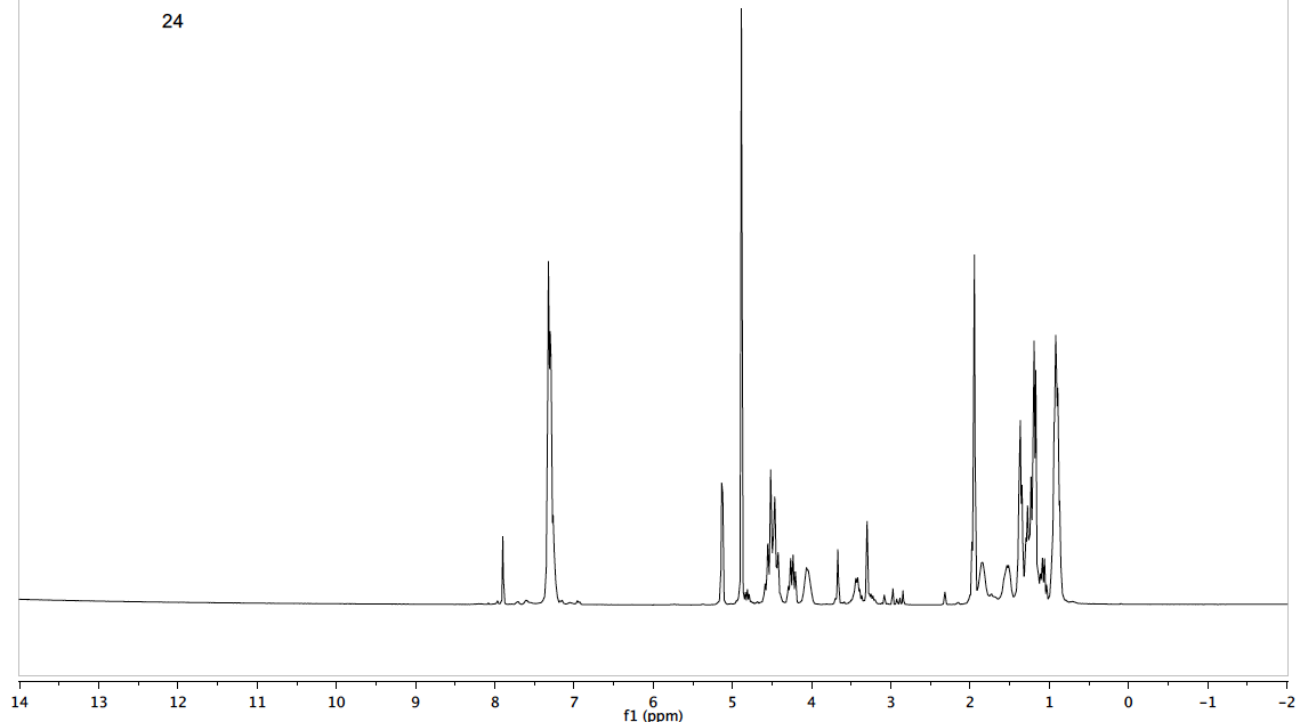

simone

3

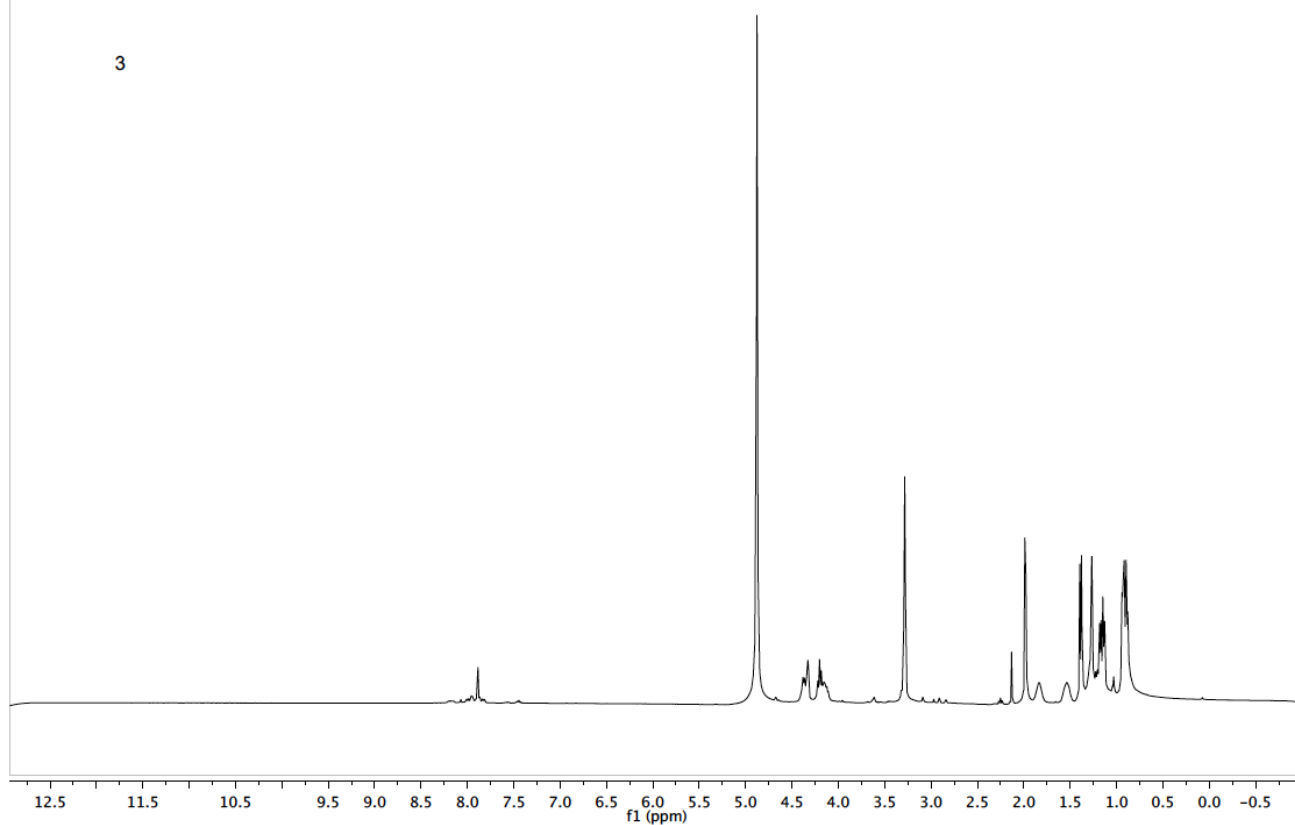

sgi261  
Std Proton parameters

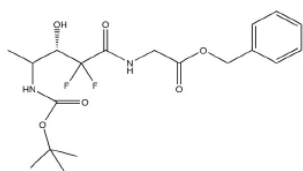

25 precursor

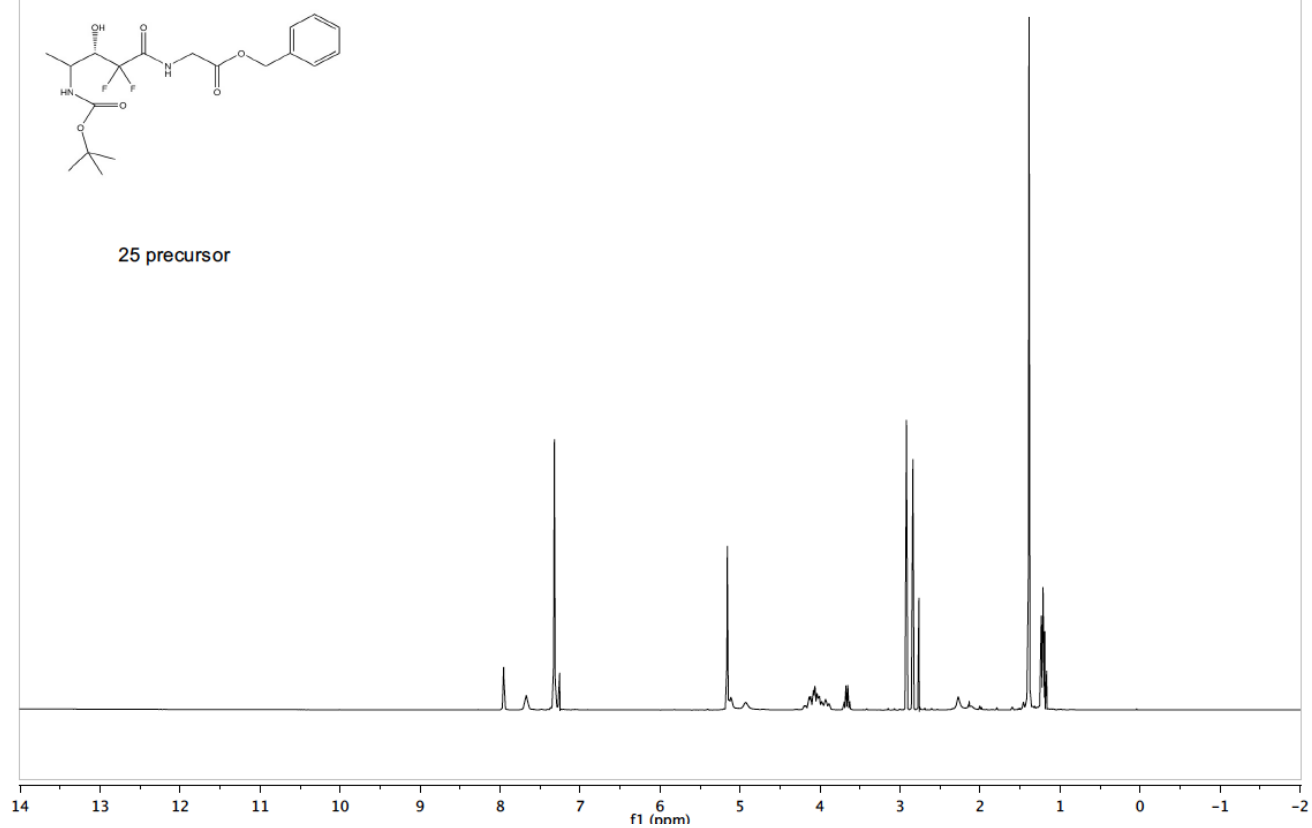



sgi329  
Std Proton parameters

26a

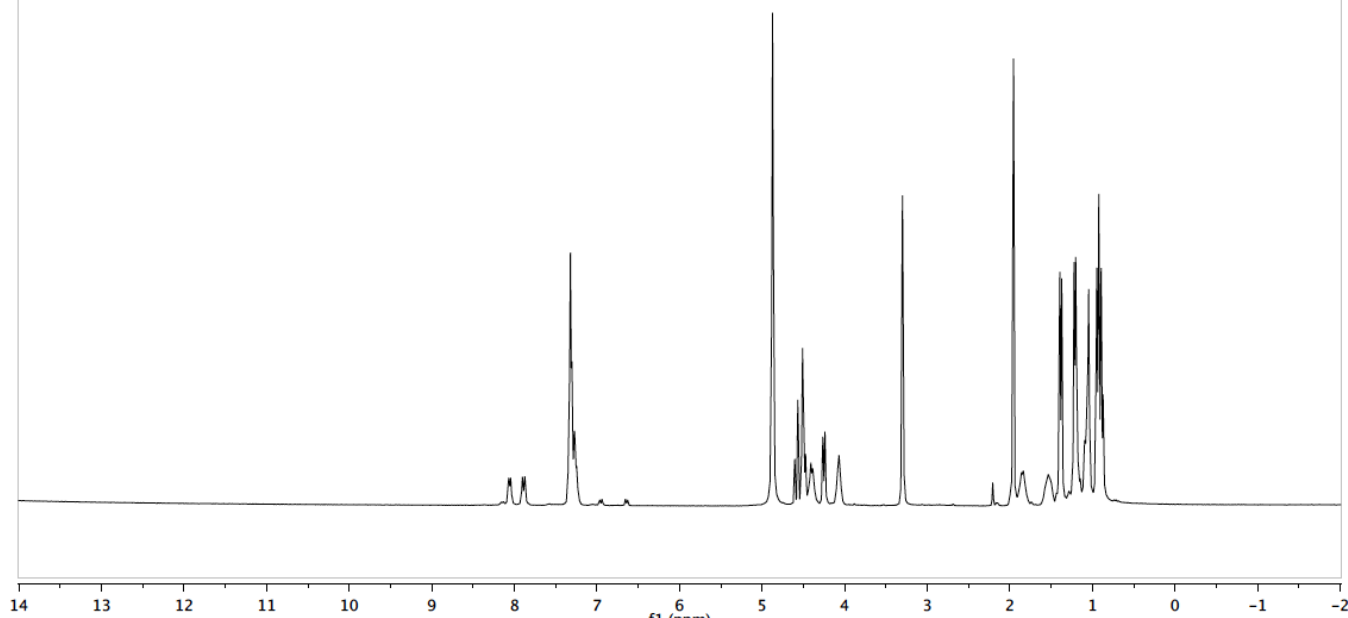

sgi331  
Std Proton parameters

26b

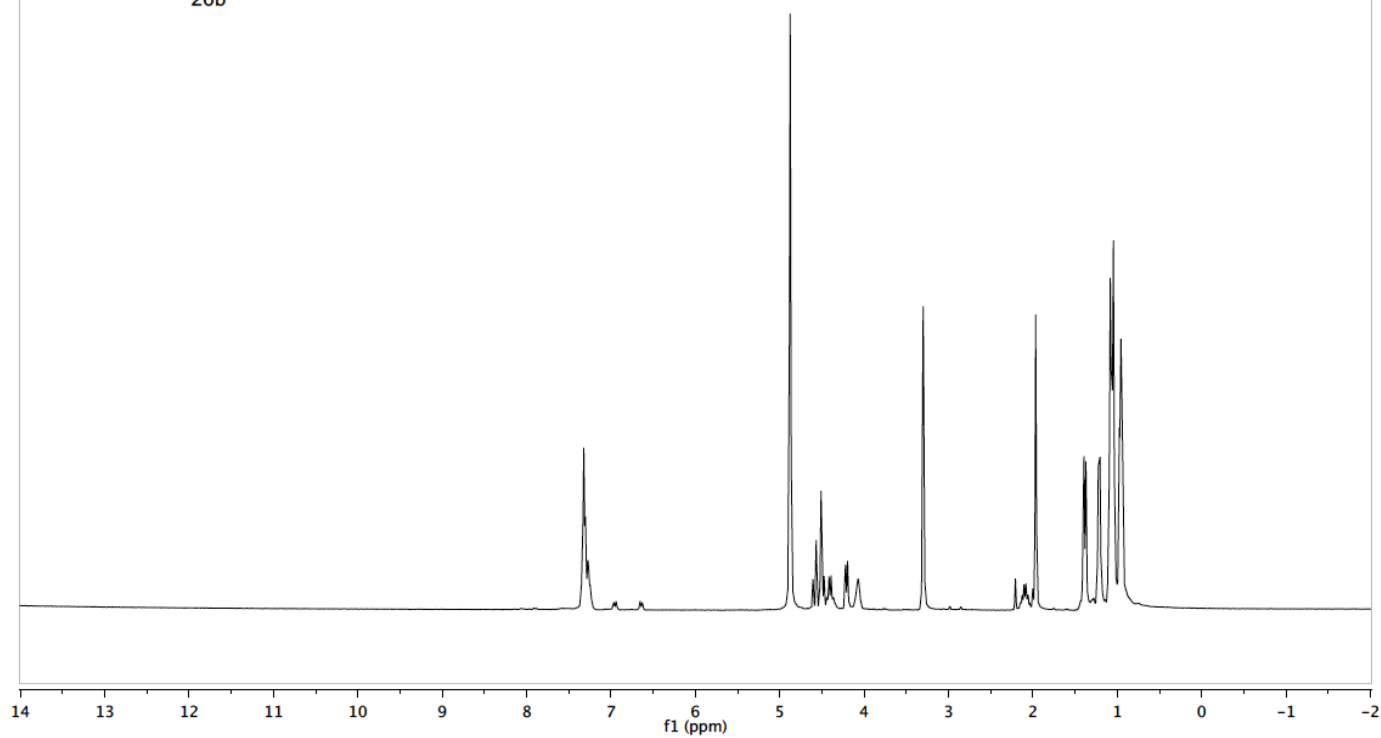

sgl330  
Std Proton parameters

26c

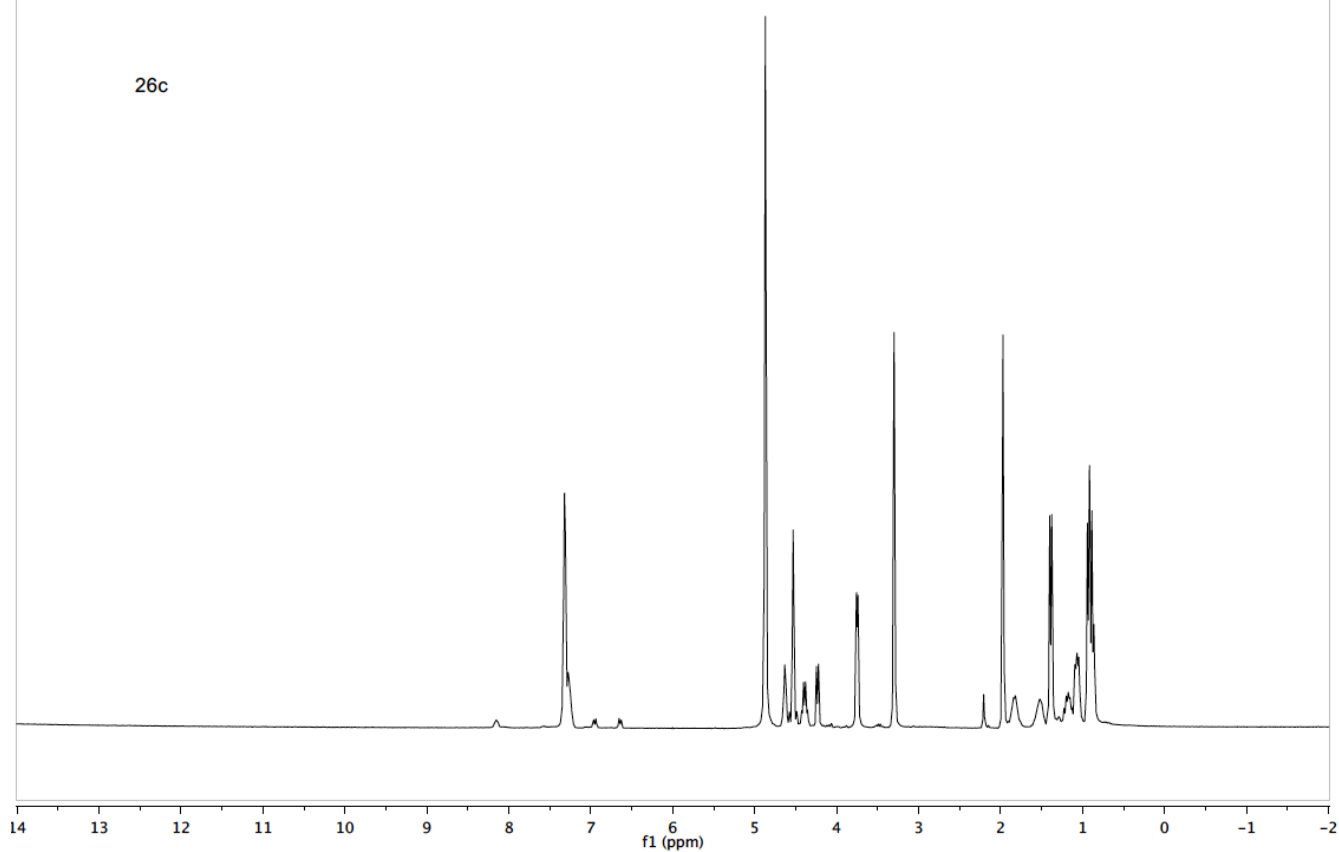

sgl352  
Std Proton parameters

26d

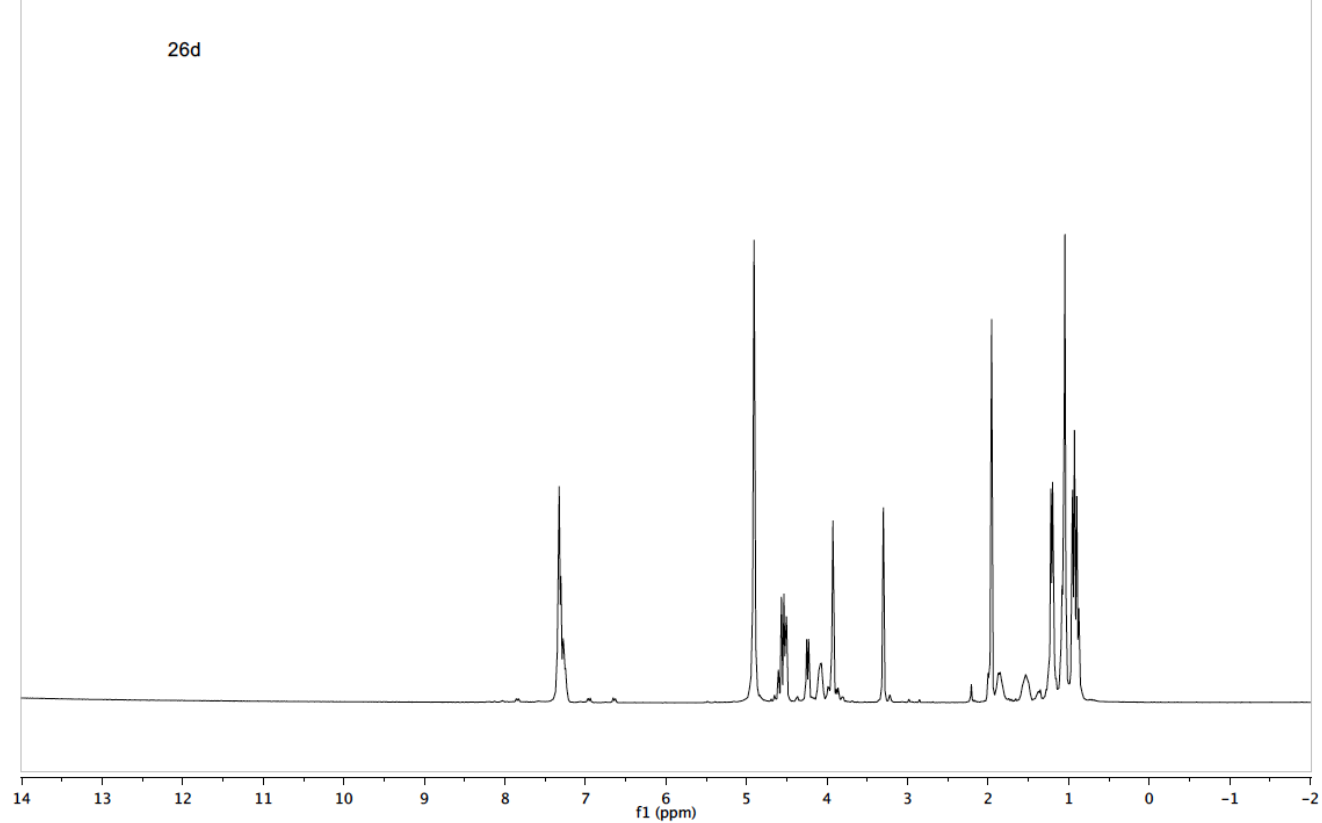

sgl306\_DMSO  
Std Proton parameters

26e

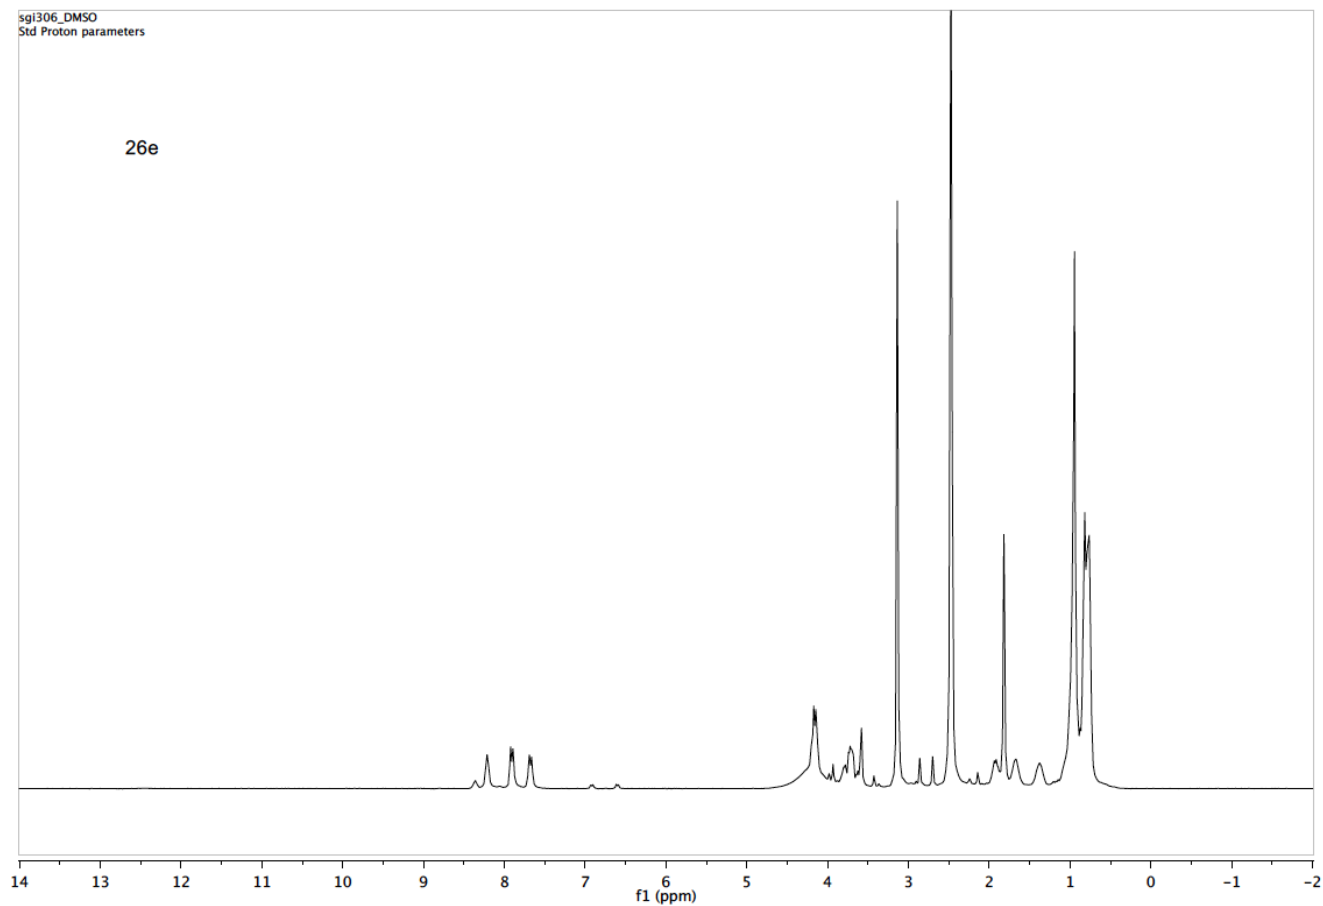

sgl360  
Std Proton parameters

26f

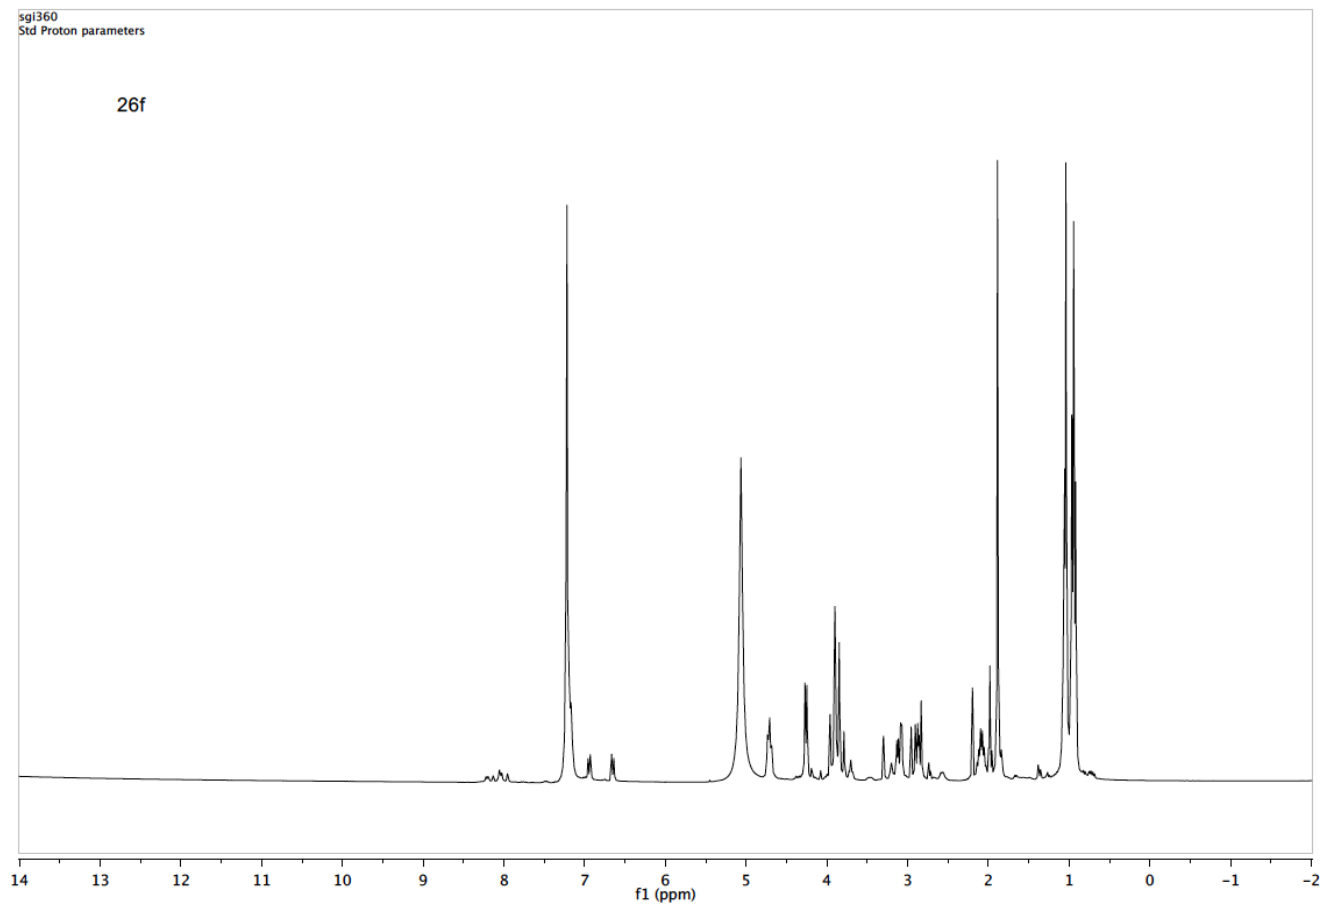

sgl361  
Std Proton parameters

26g

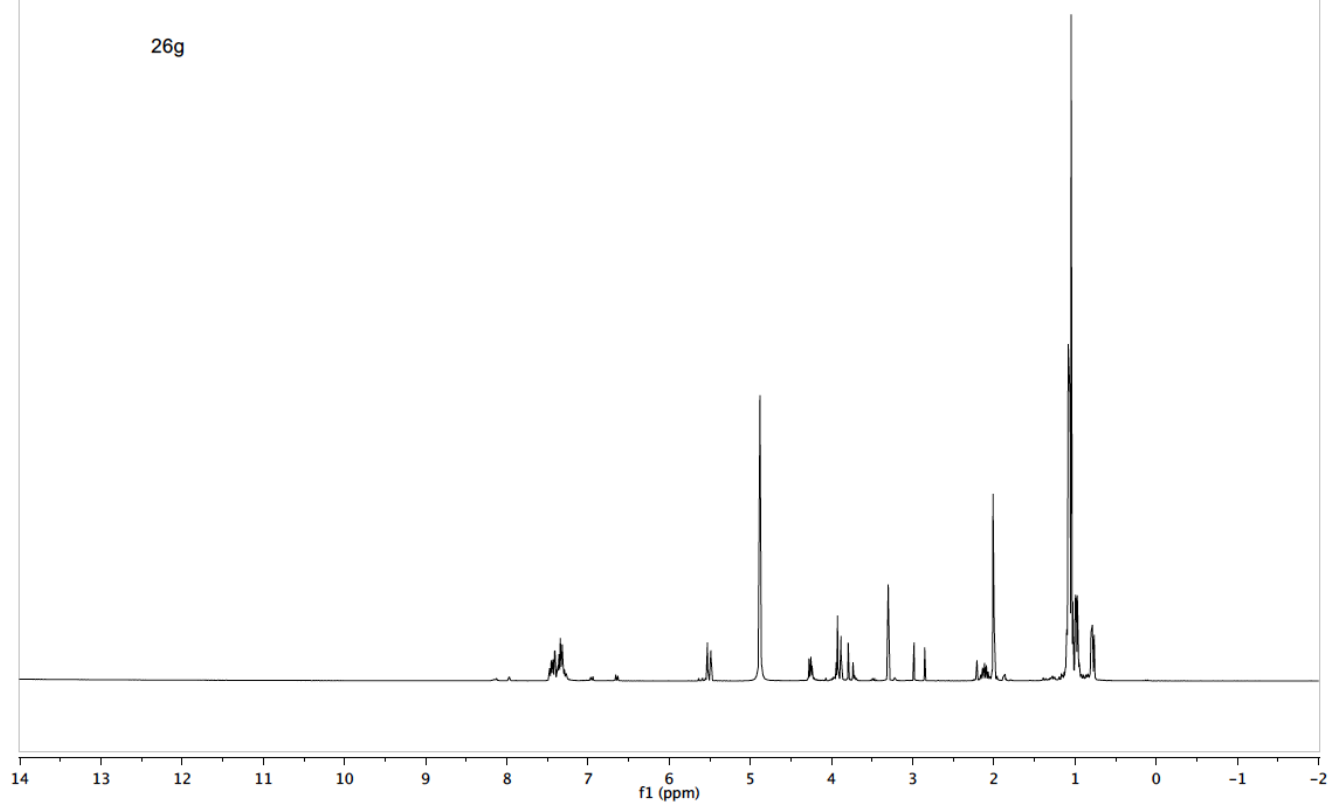

sgl400  
Std Proton parameters

26h

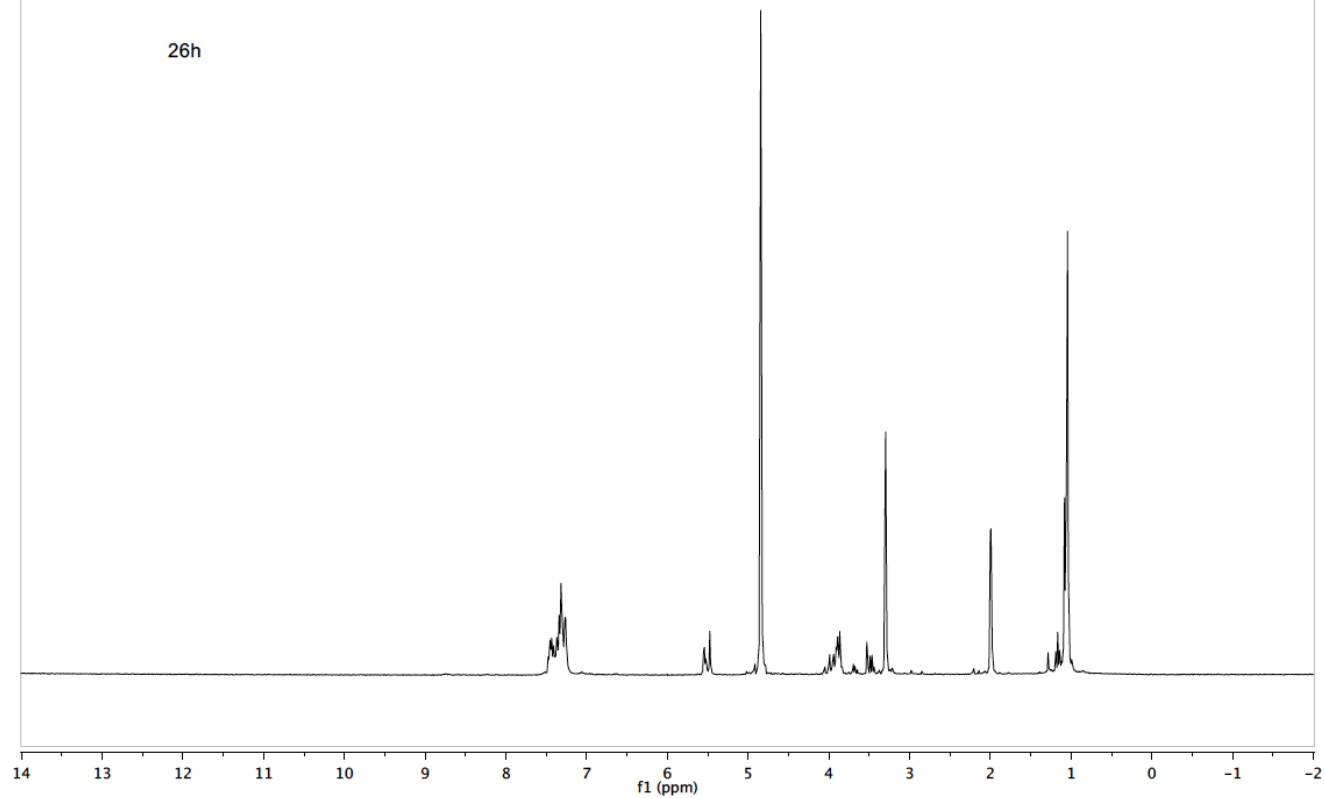

sgl399  
Std Proton parameters

26i

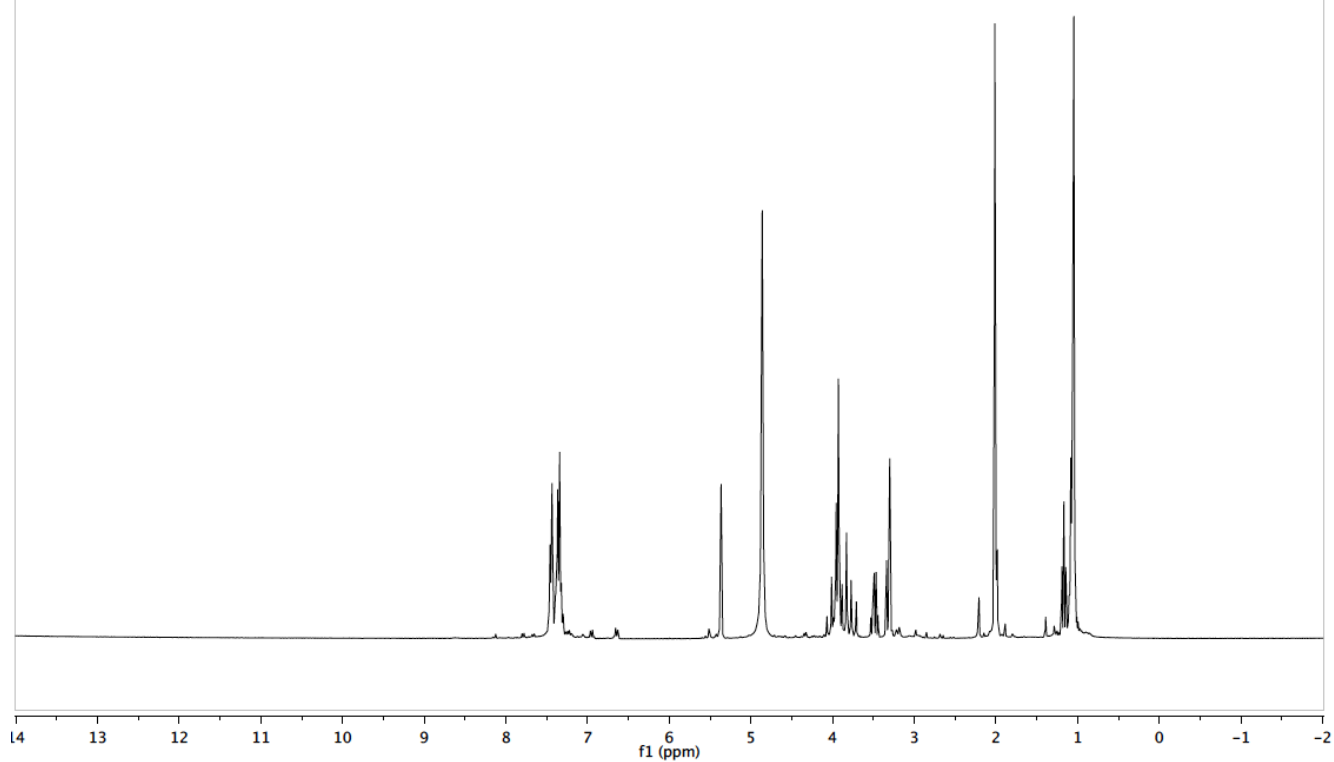

sgl401  
Std Proton parameters

26j

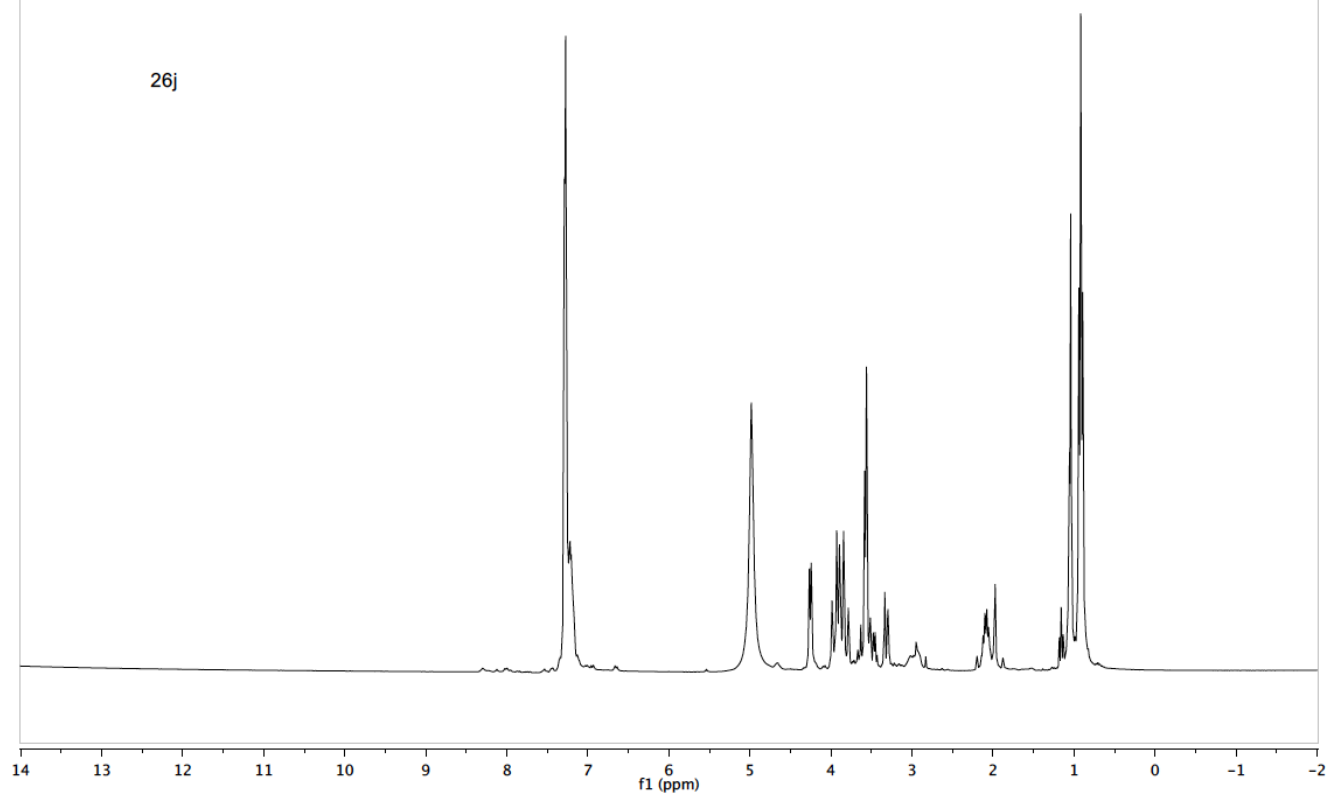

sgl409  
Std Proton parameters

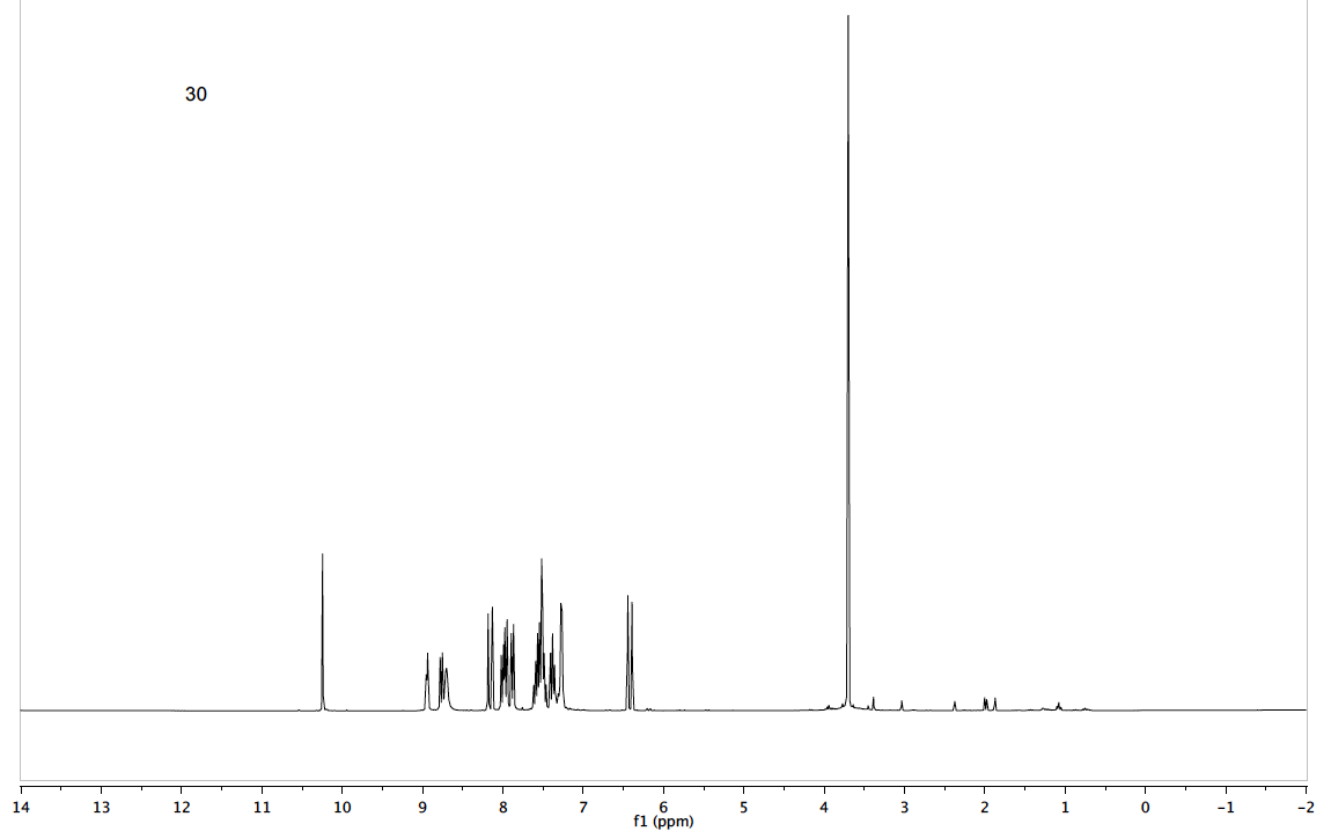

sgl415  
Std Proton parameters

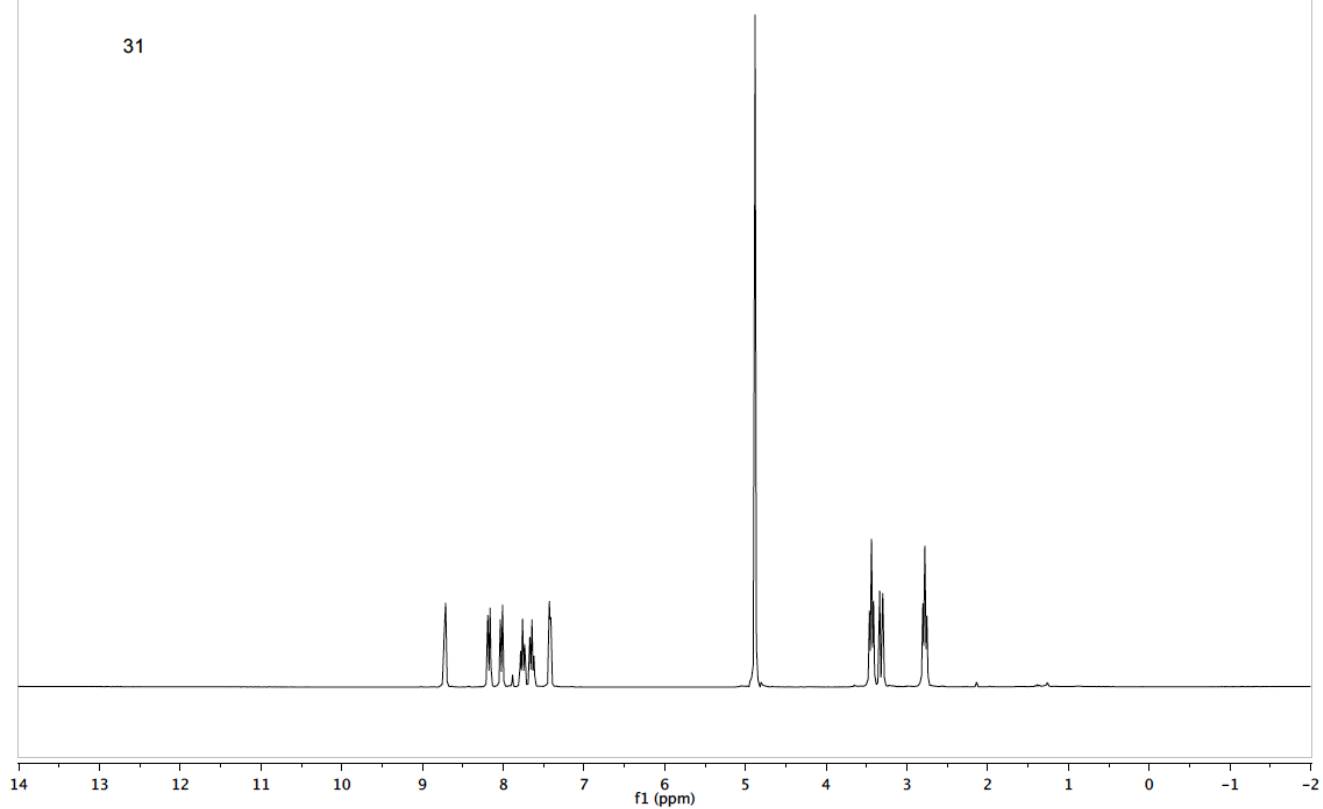

sgi416  
Std Proton parameters

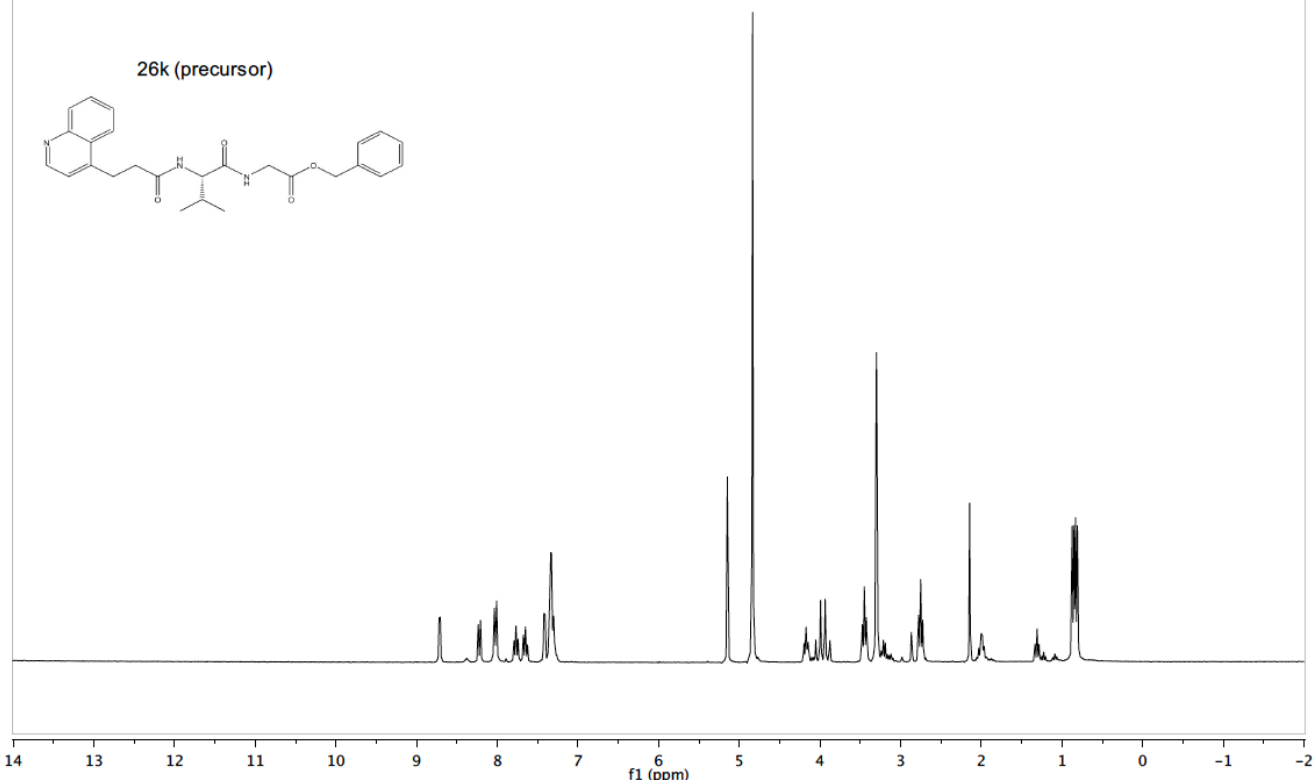

sgi435  
Std Proton parameters

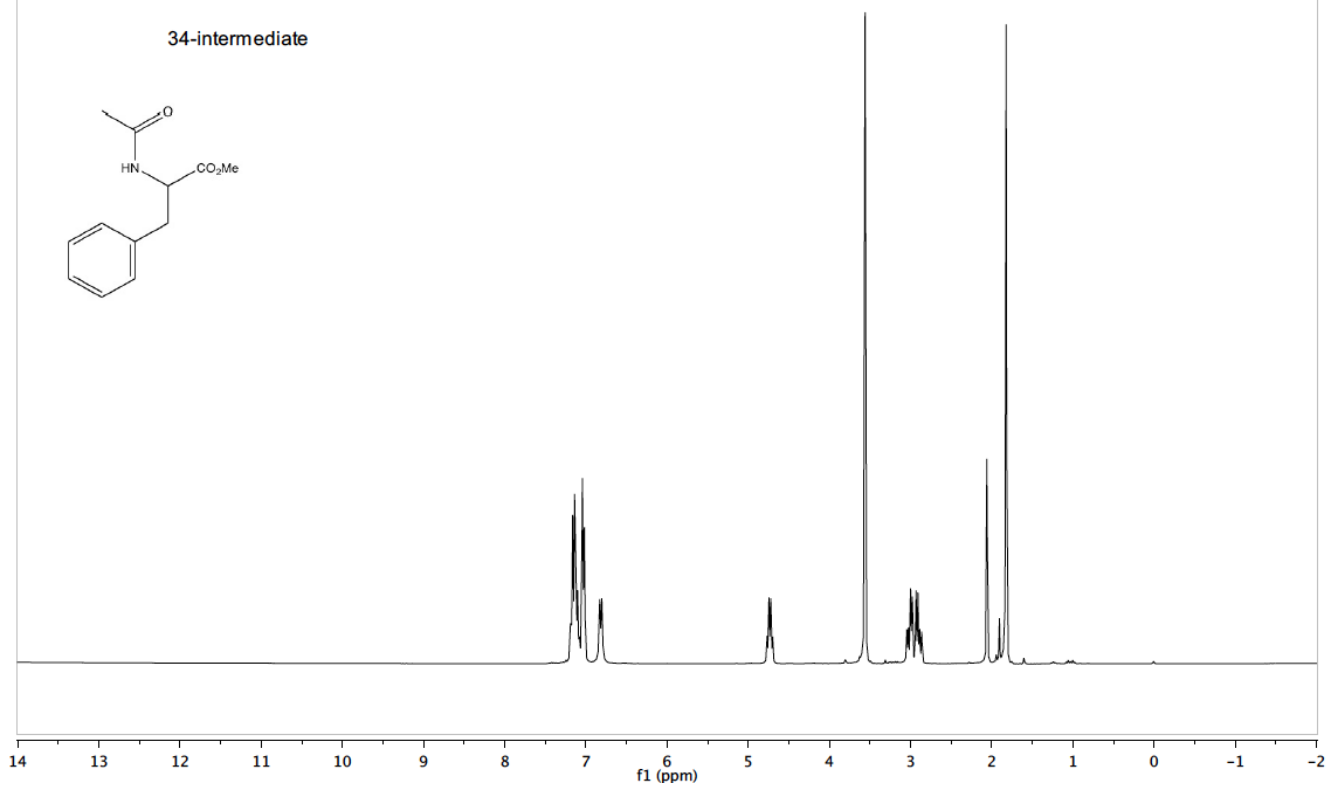

sgl437  
Std Proton parameters

34

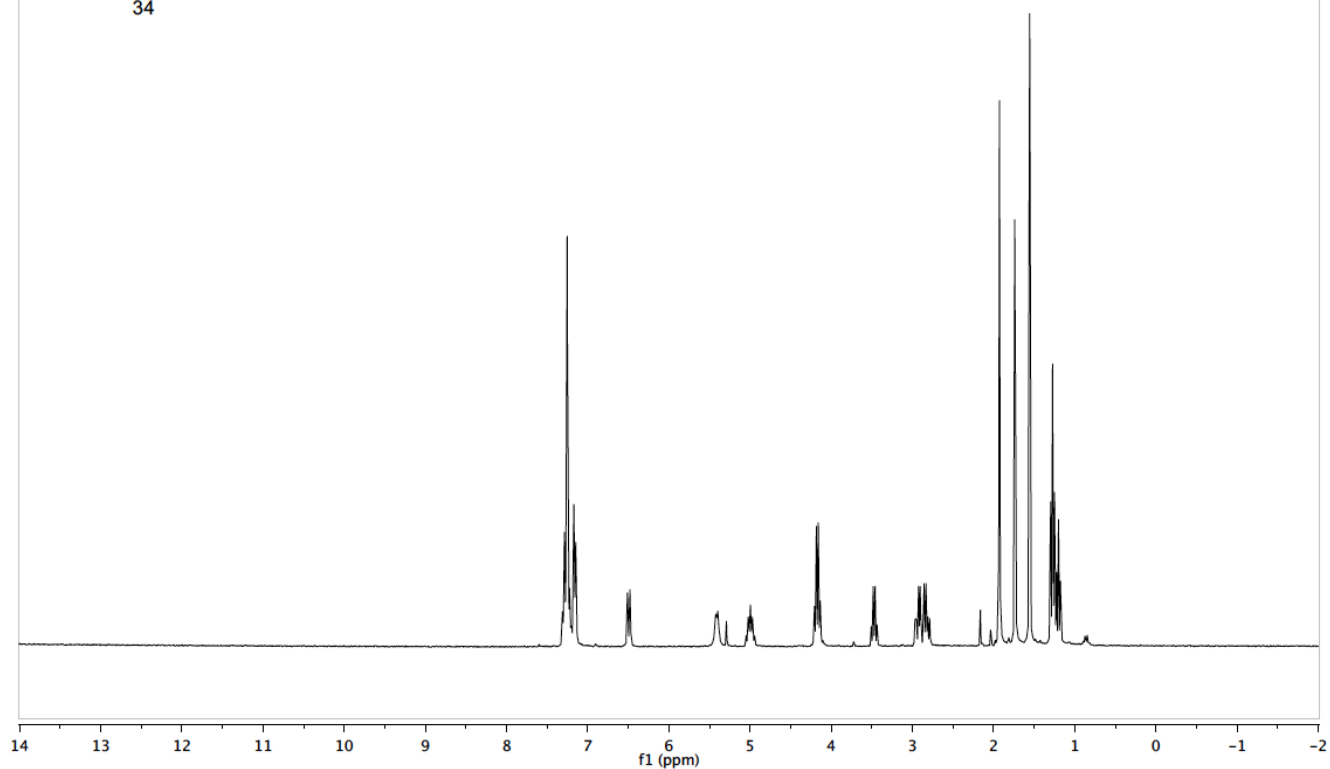

sgl438  
Std Proton parameters

35 (intermediate)

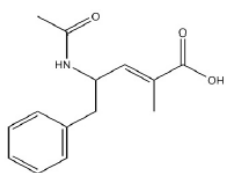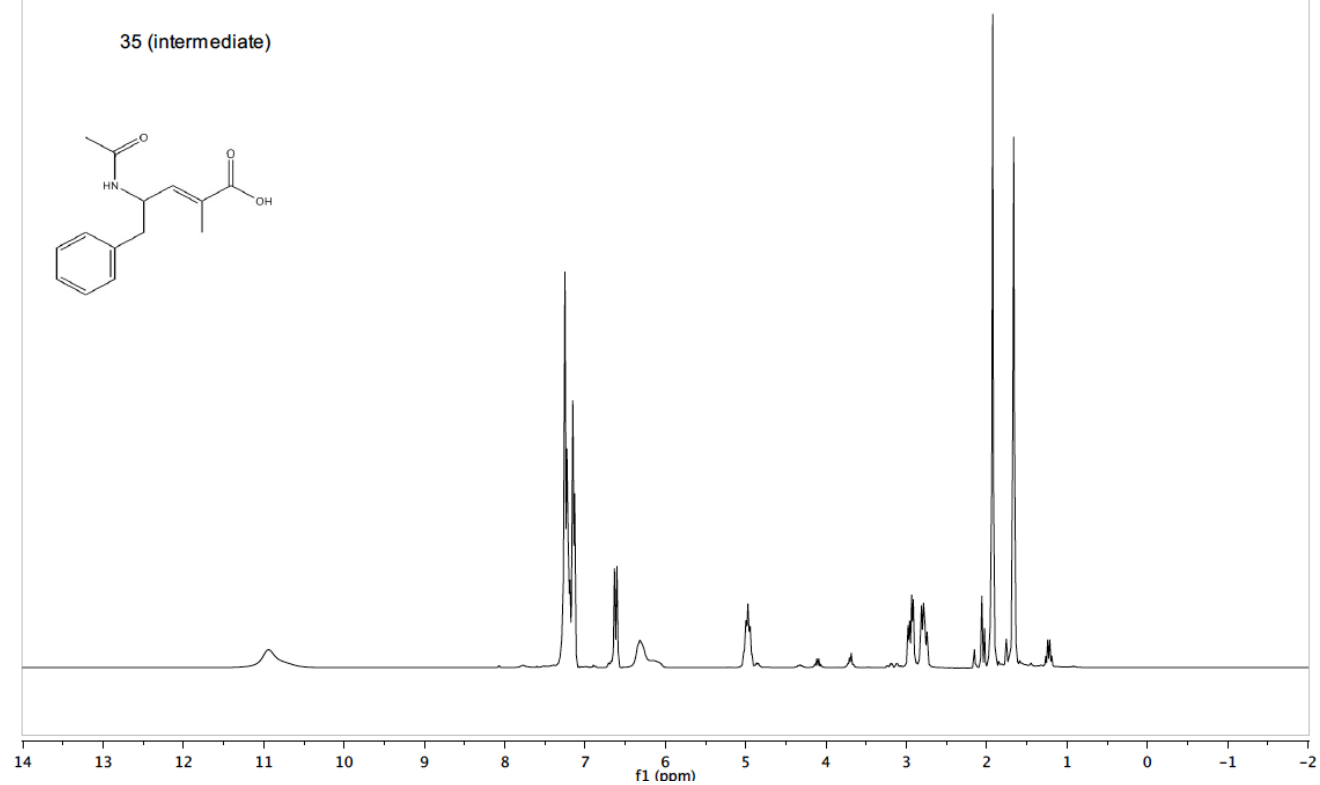



sgl440  
Std Proton parameters

35

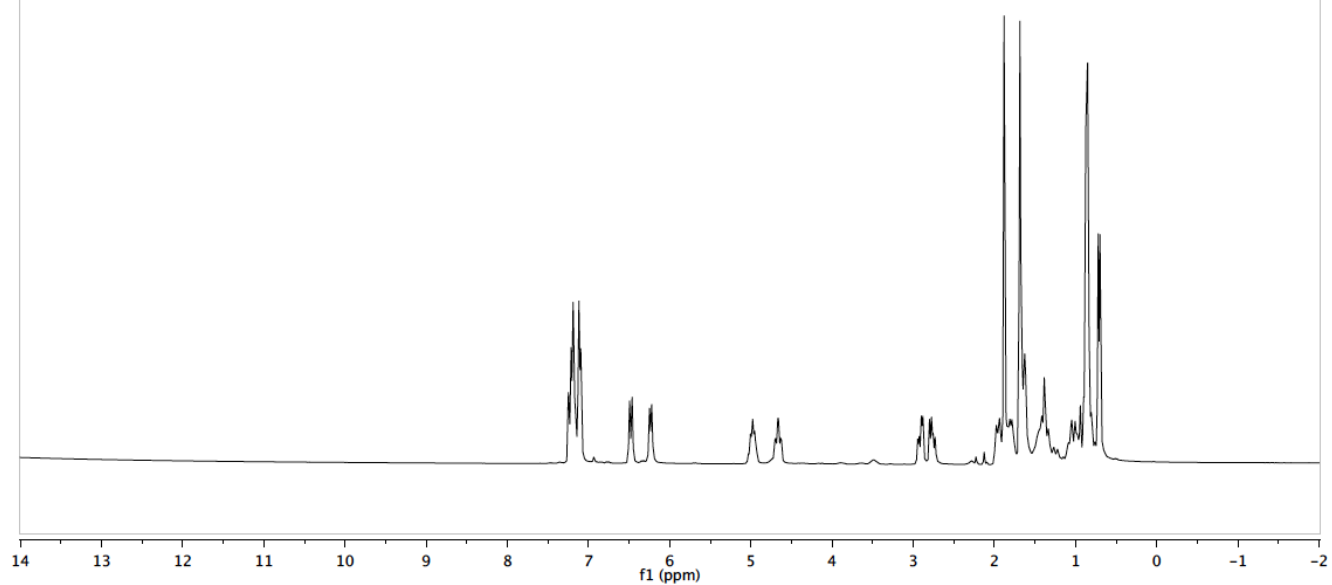

sgl442  
Std Proton parameters

2S,3R-36

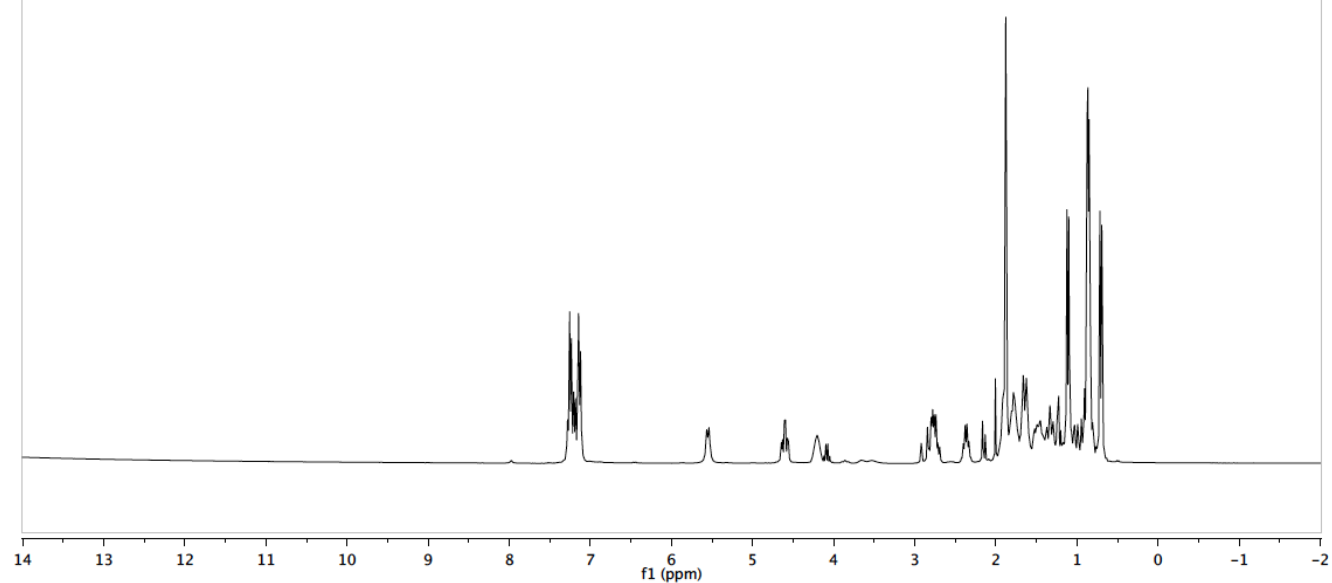

sgi441  
Std Proton parameters

2R,4R-37

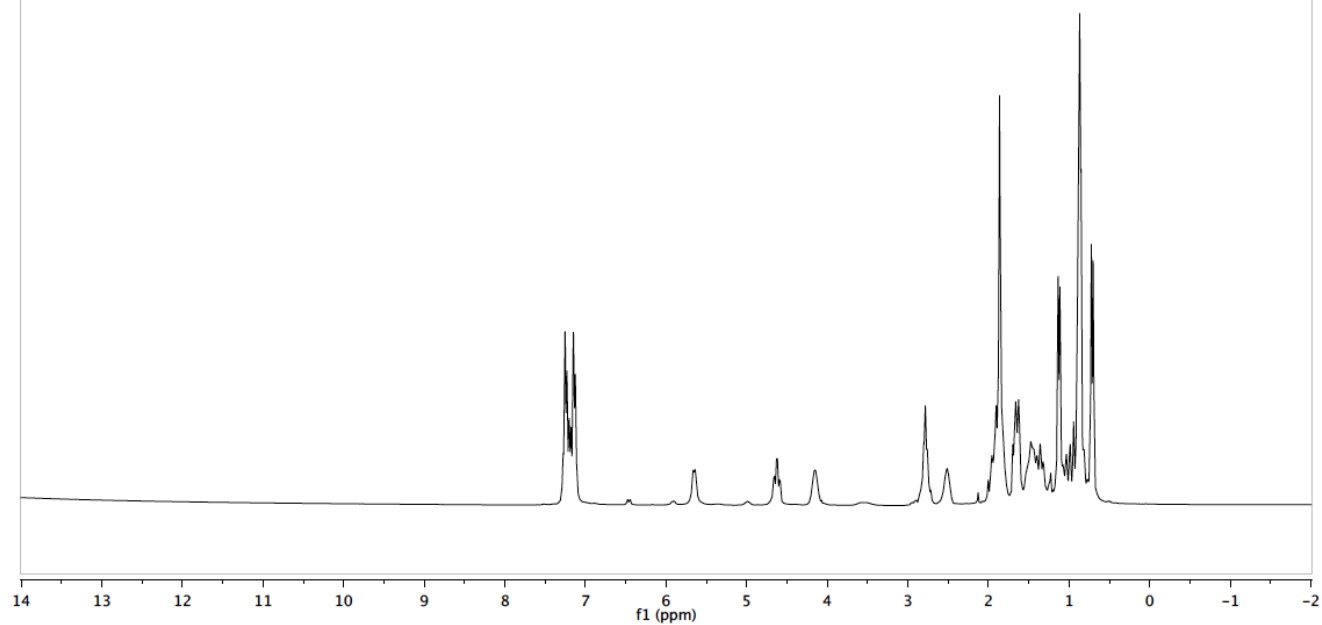

sgi443  
Std Proton parameters

2S,4R-38

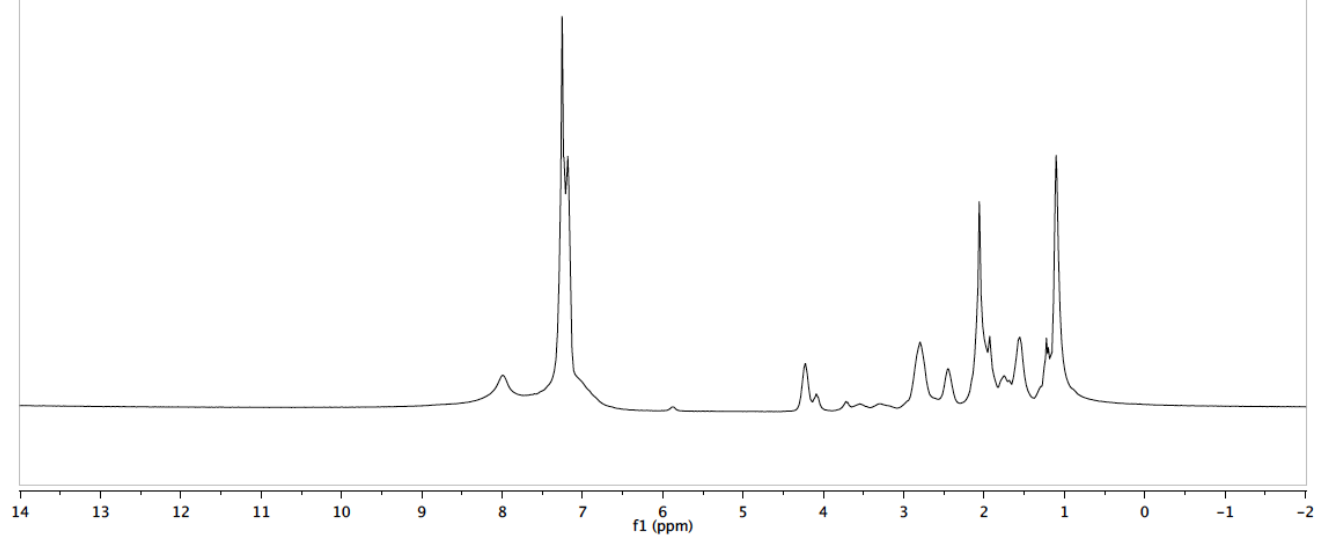

sgl444  
Std Proton parameters

2R,4R-39

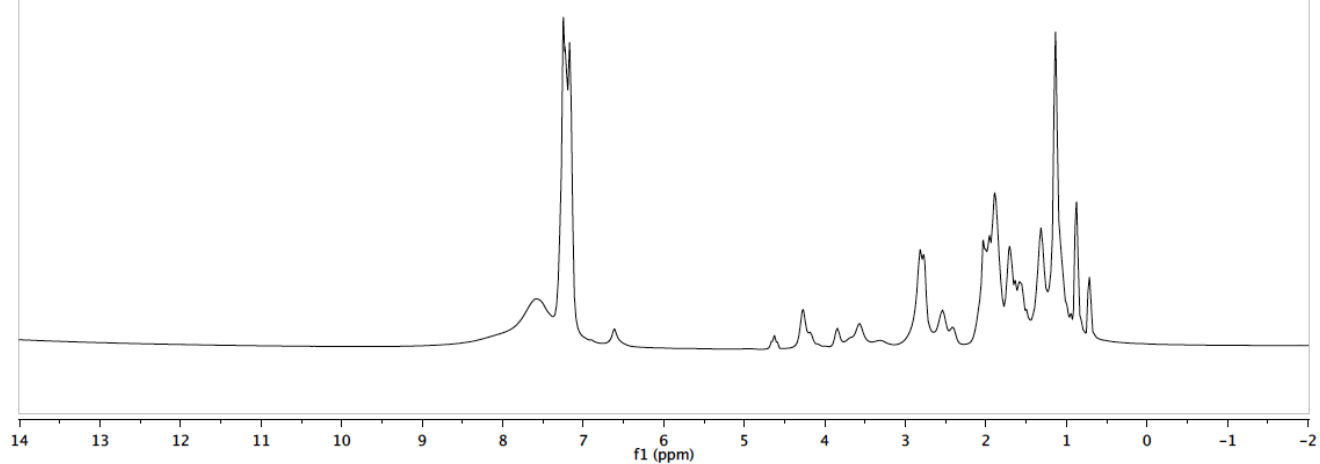

sgl445  
Std Proton parameters

2S,4R-26I (precursor)

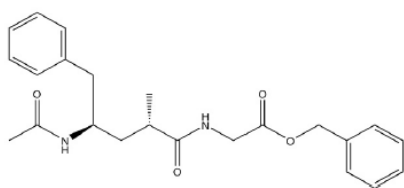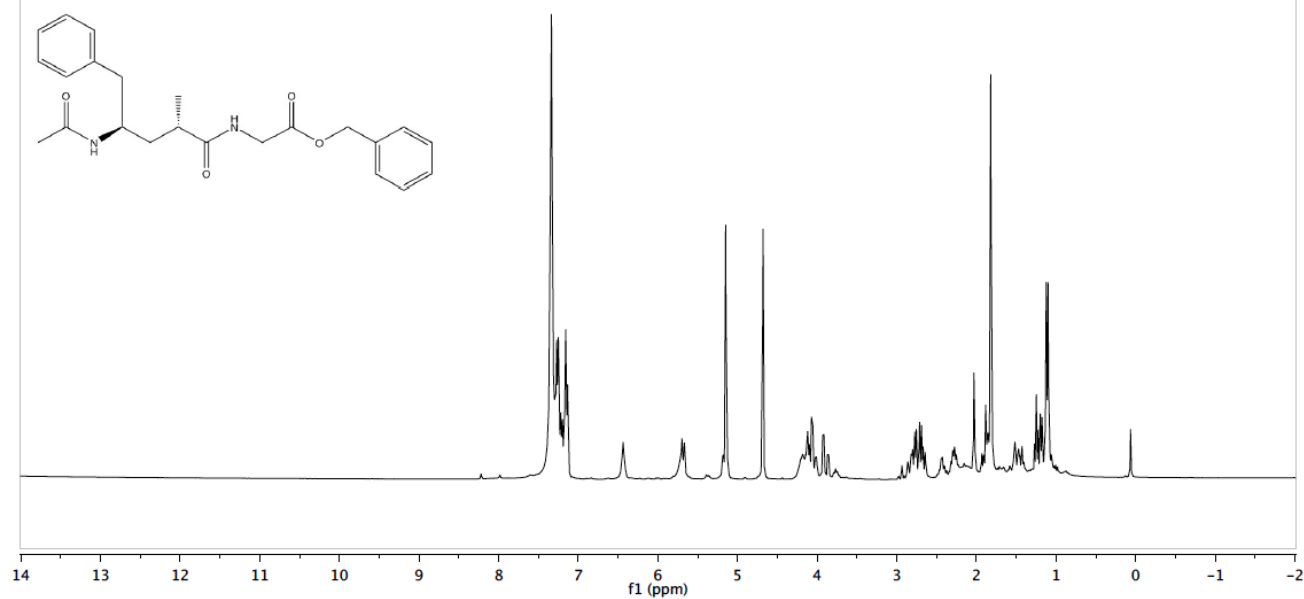

sgl446  
Std Proton parameters

2R,4R-26m (precursor)

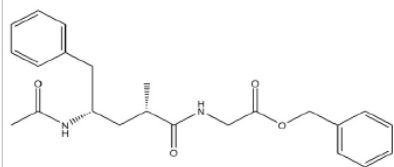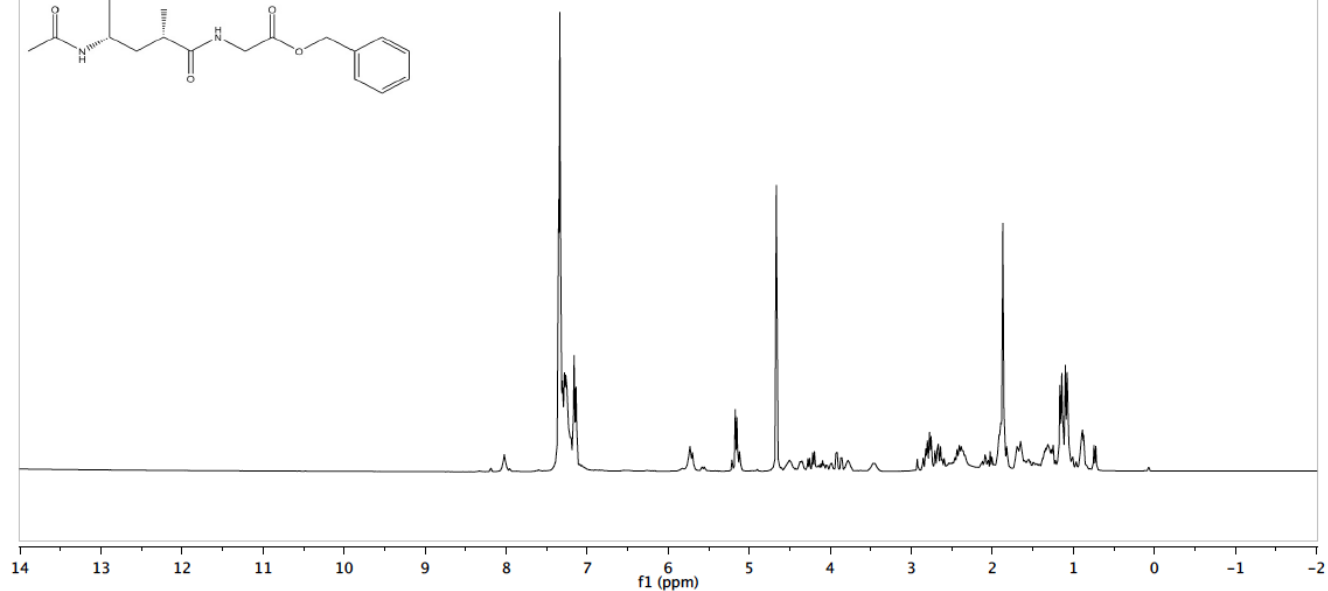

sgl354  
Std Proton parameters

27a

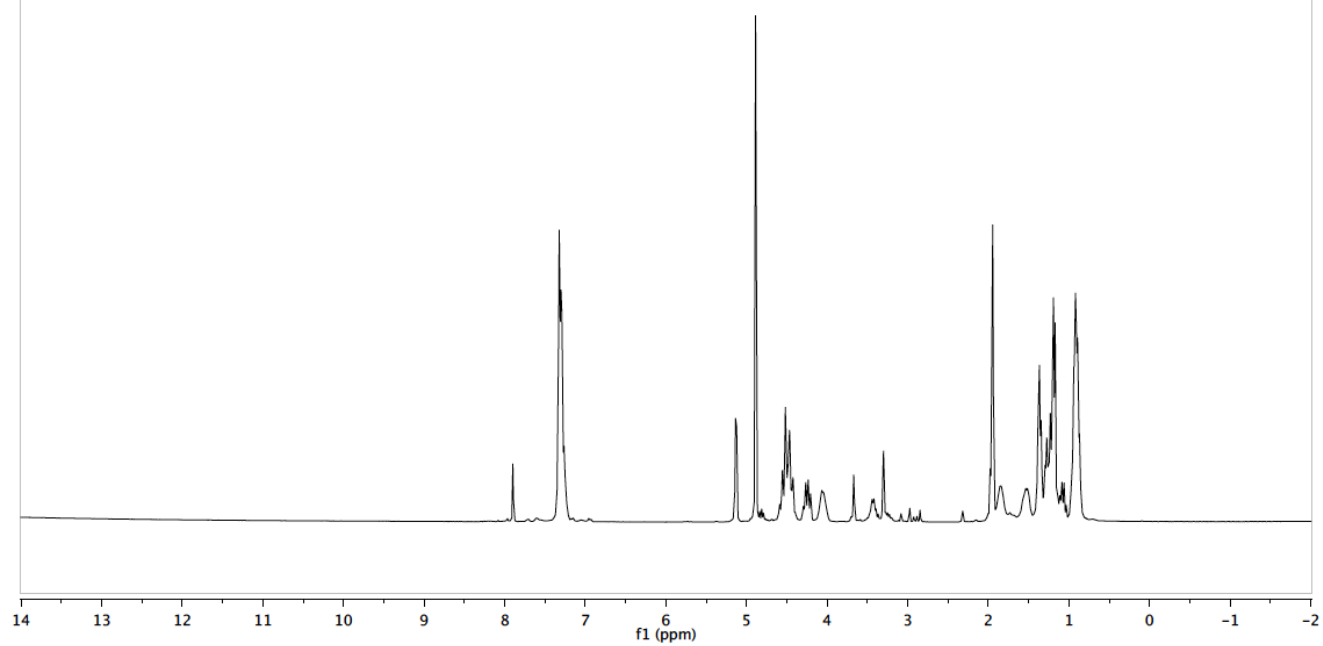

sgl333  
Std Proton parameters

27b

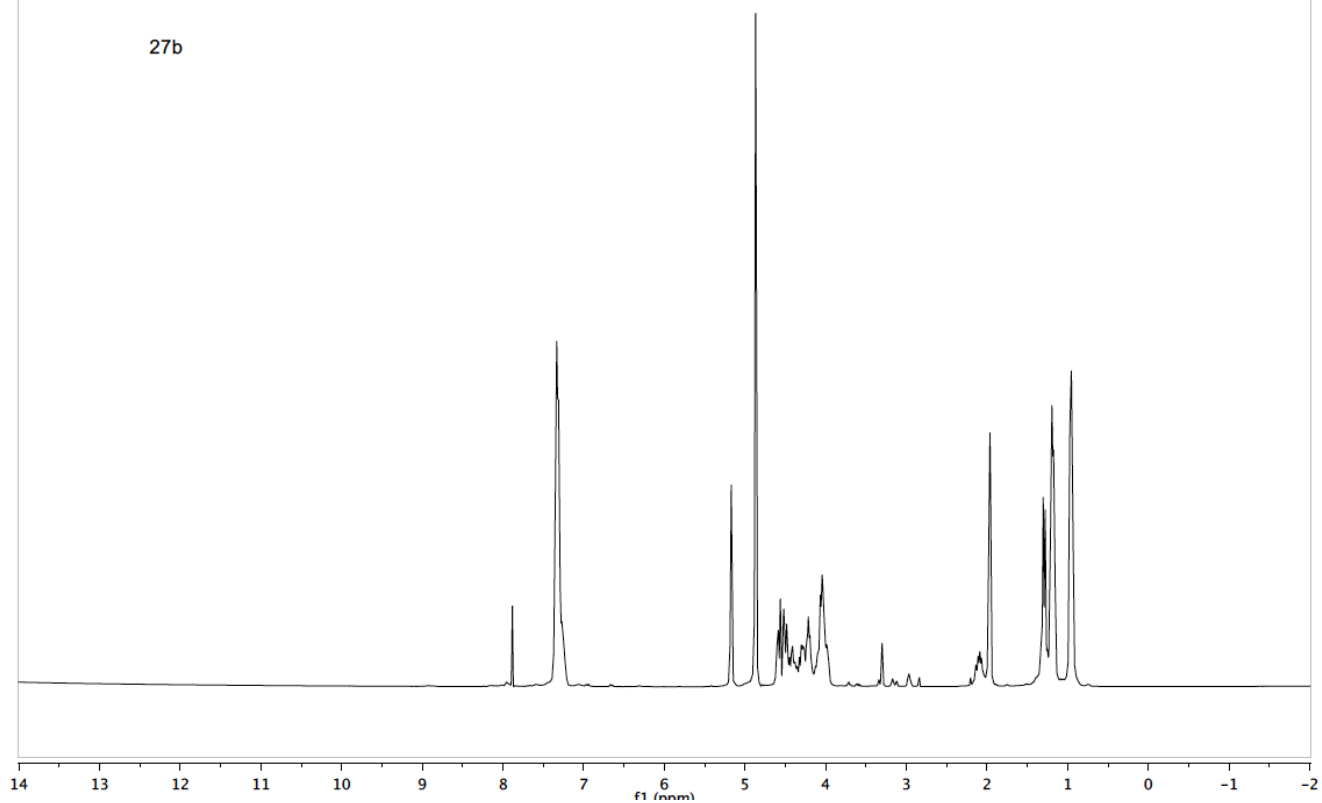

sgl332  
Std Proton parameters

27c

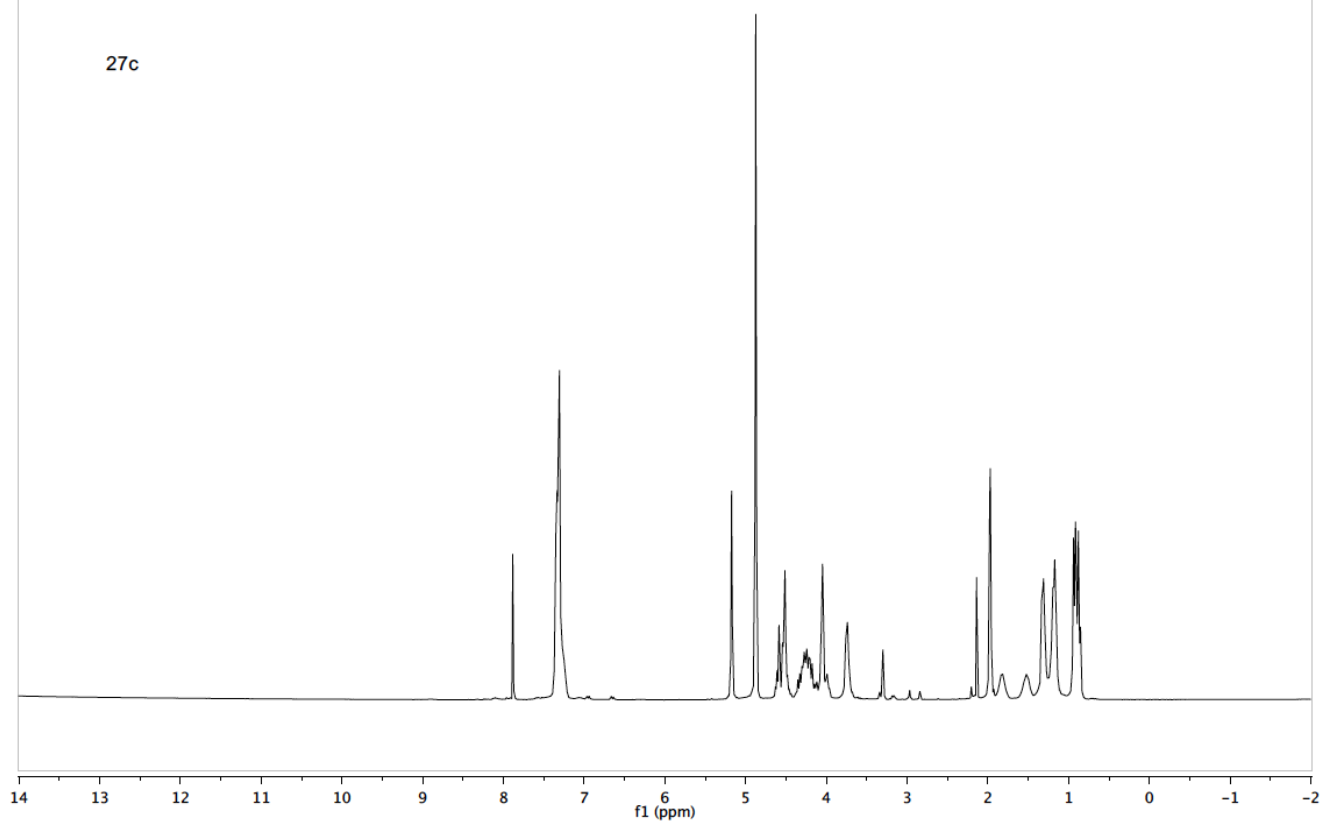

simone

27d

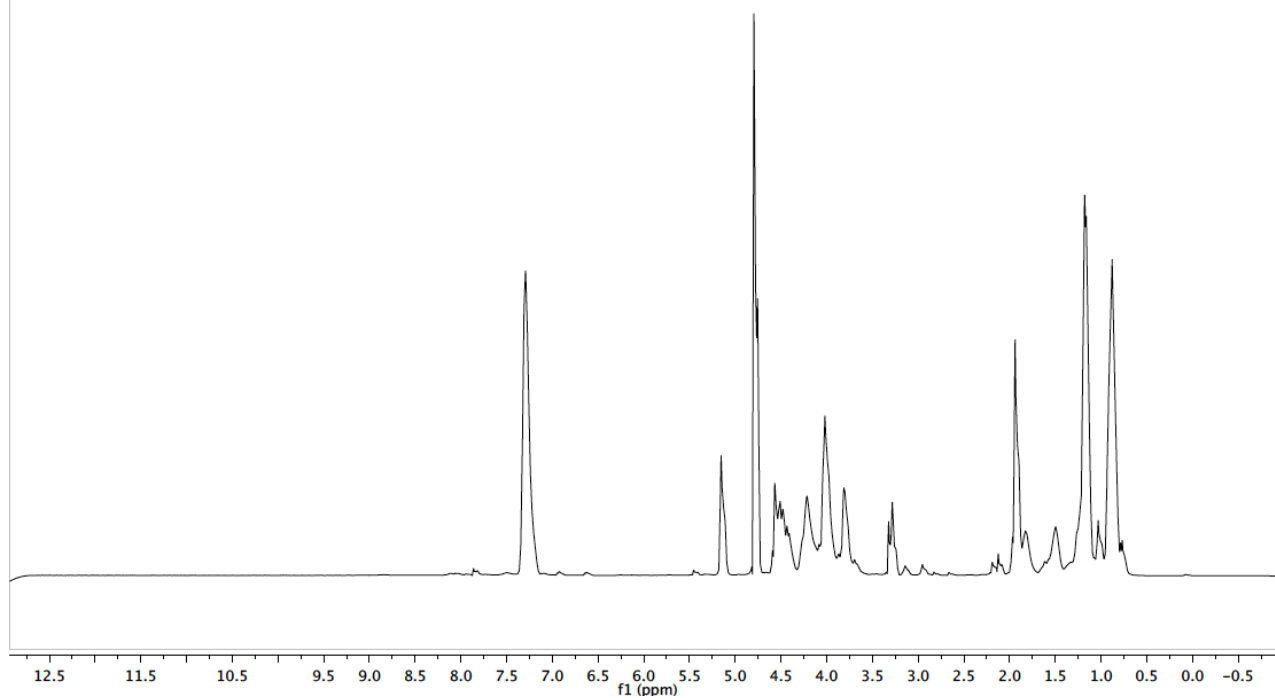

sgi308  
Std Proton parameters

27e

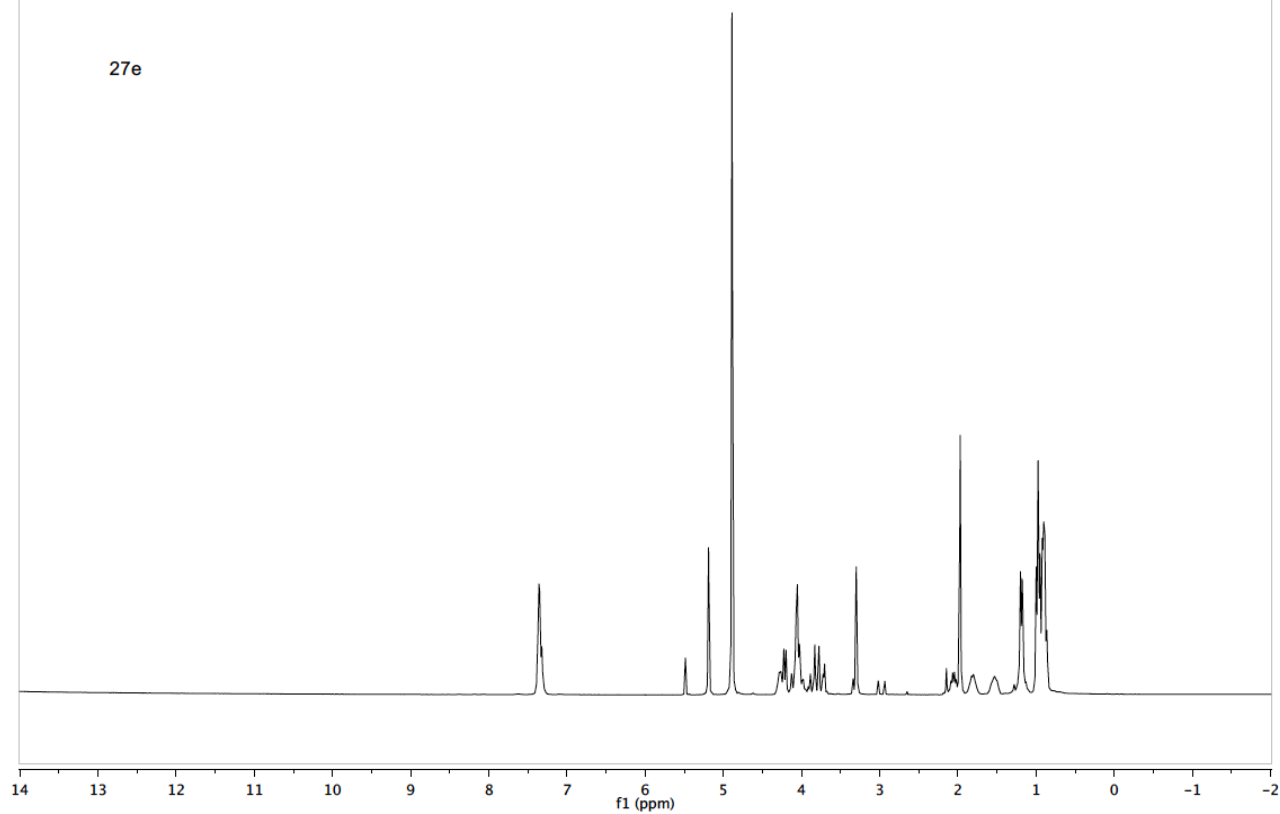

sgl362  
Std Proton parameters

27f

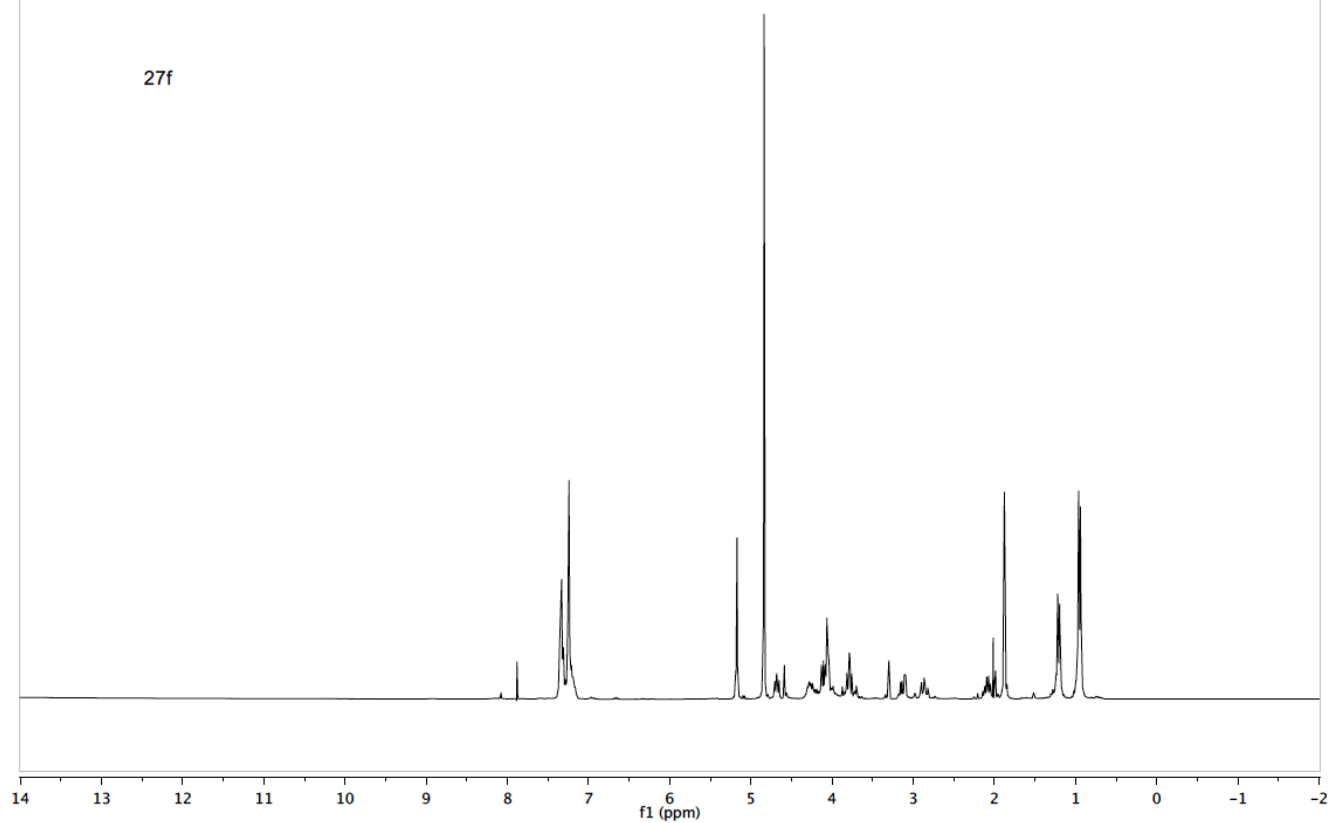

sgl364  
Std Proton parameters

27g

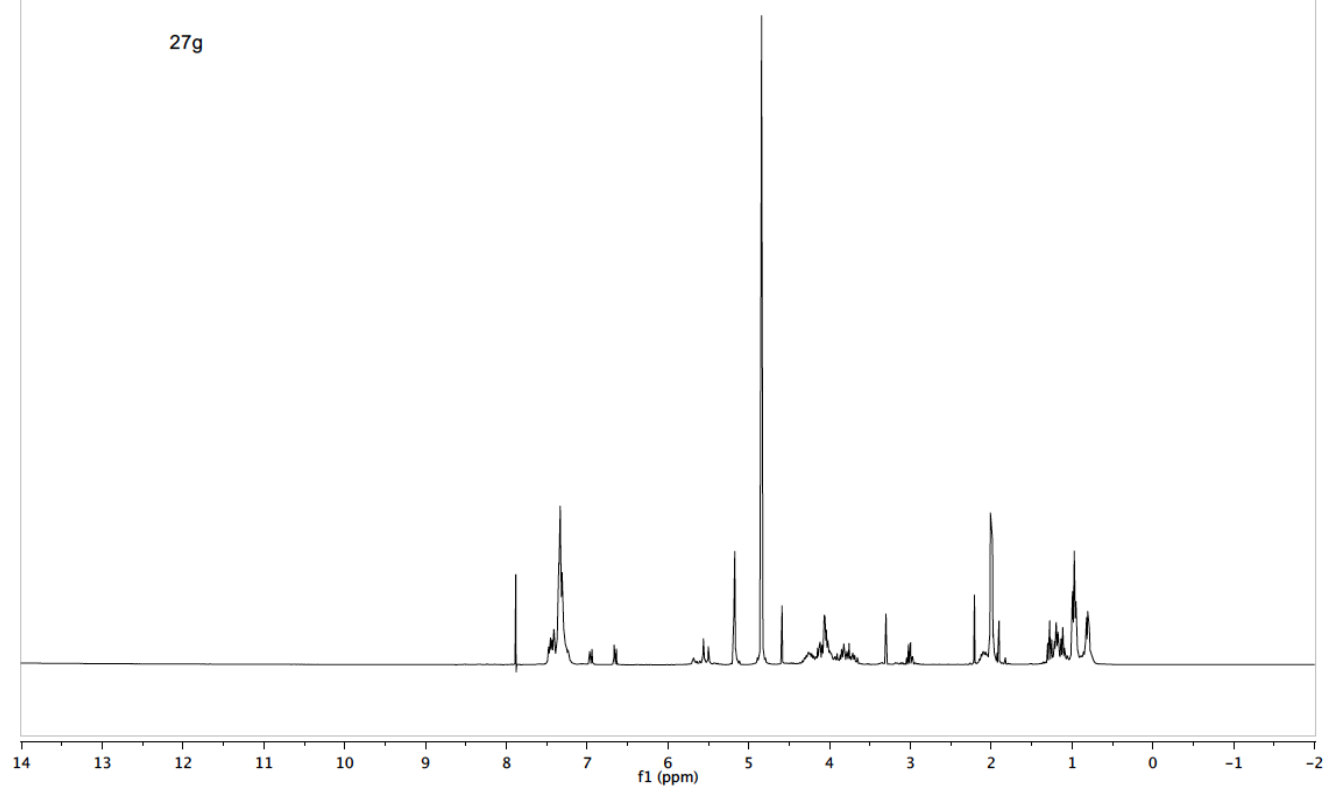

sgl423  
Std Proton parameters

27h

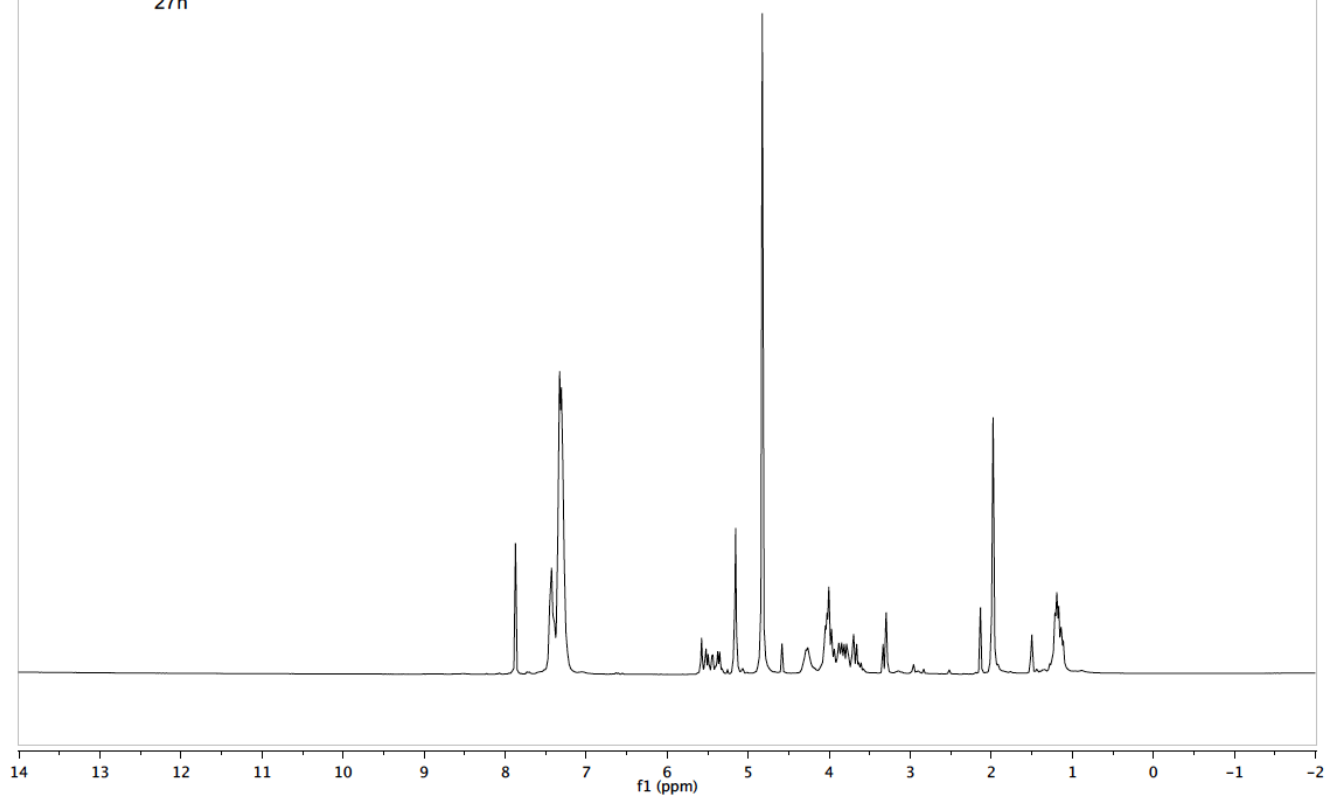

sgl424  
Std Proton parameters

27i

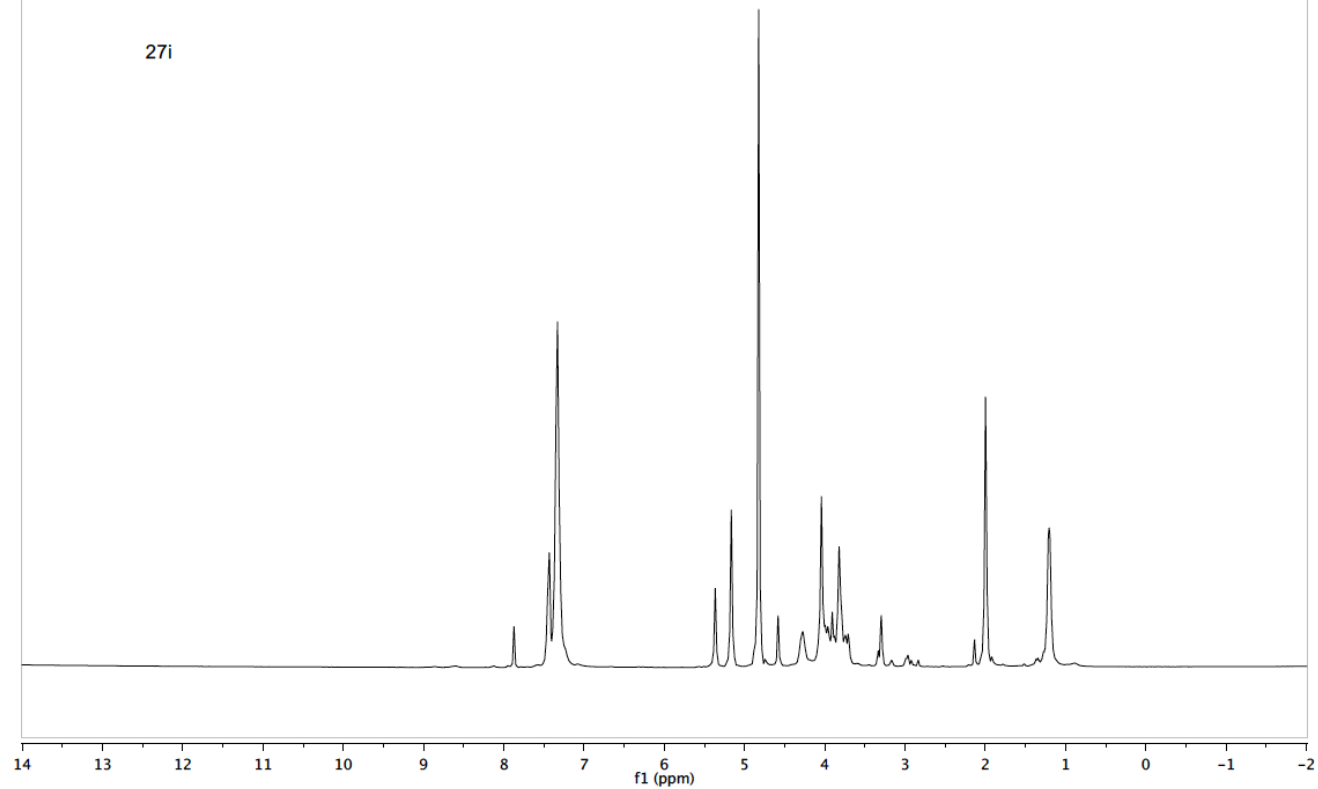



sgl425  
Std Proton parameters

27j

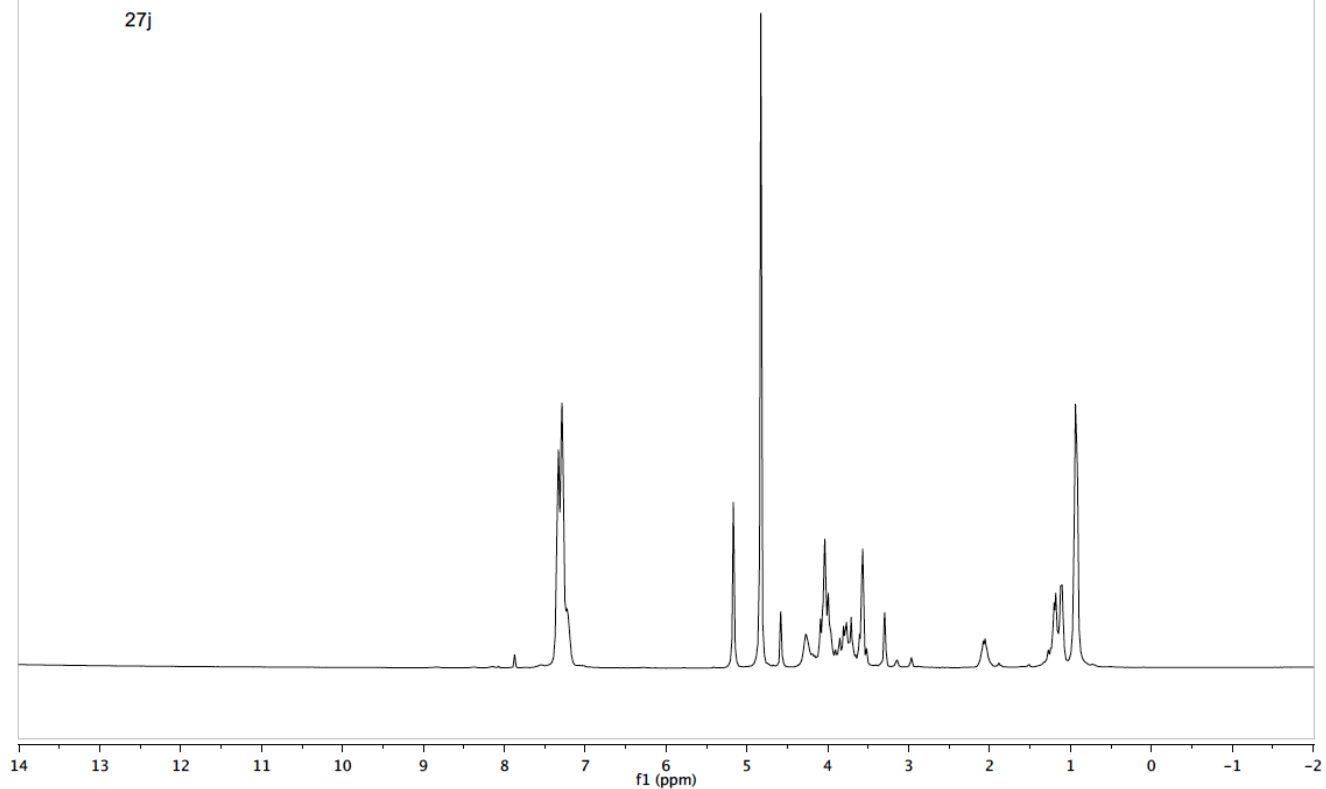

sgl418  
Std Proton parameters

27k

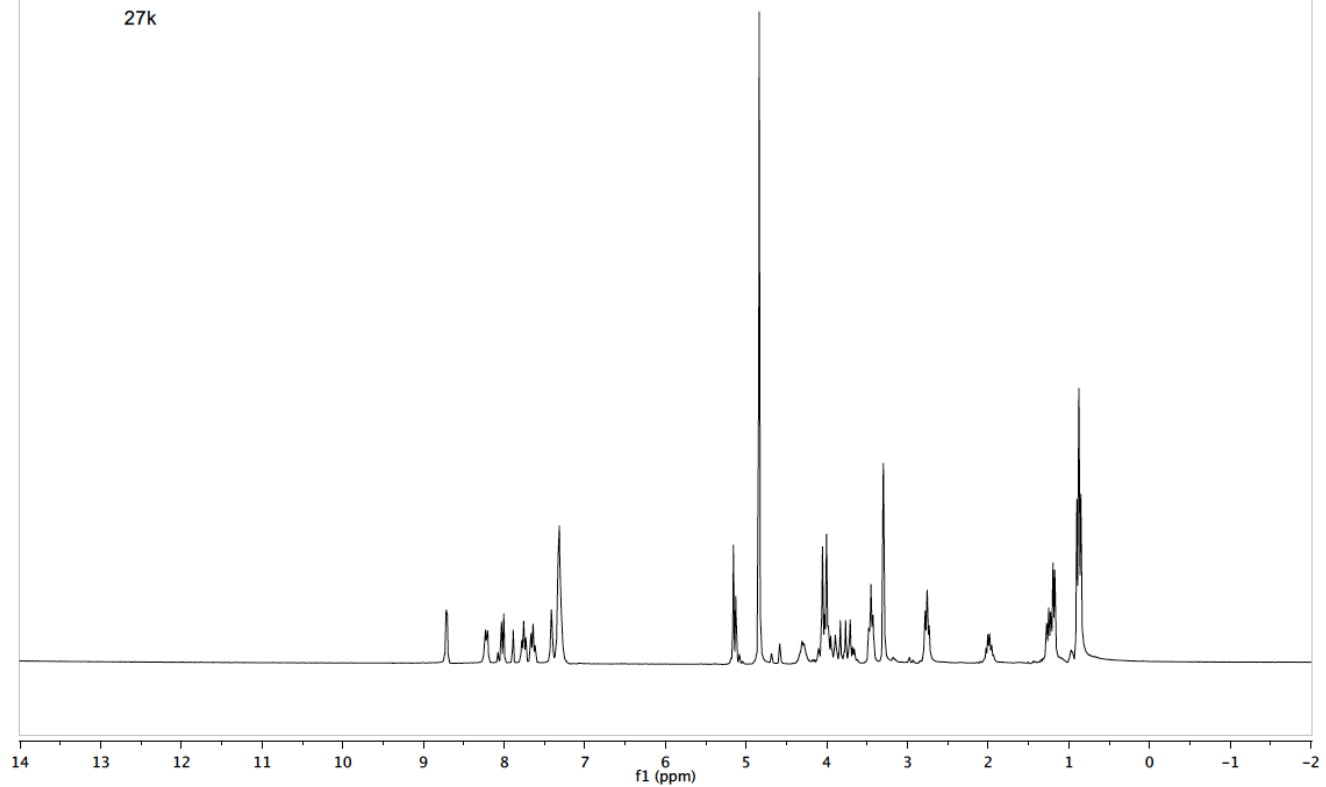

sgl448  
Std Proton parameters

27l

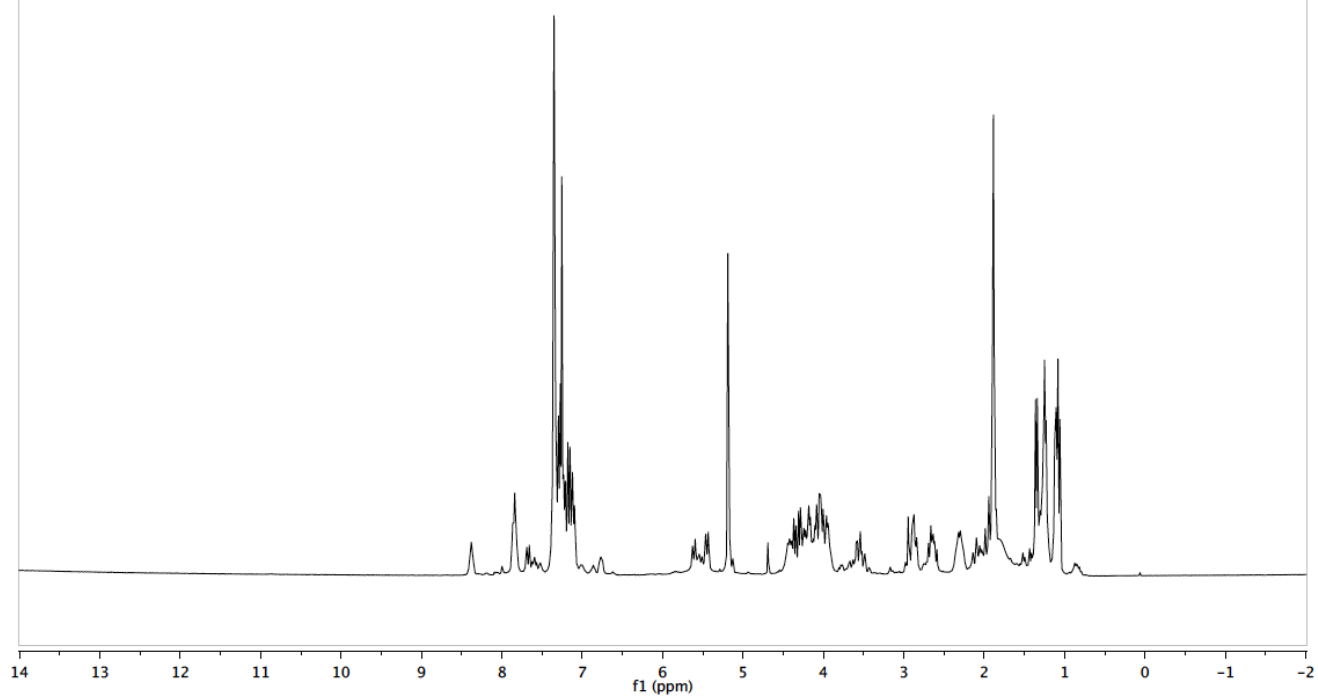

sgl447  
Std Proton parameters

27m

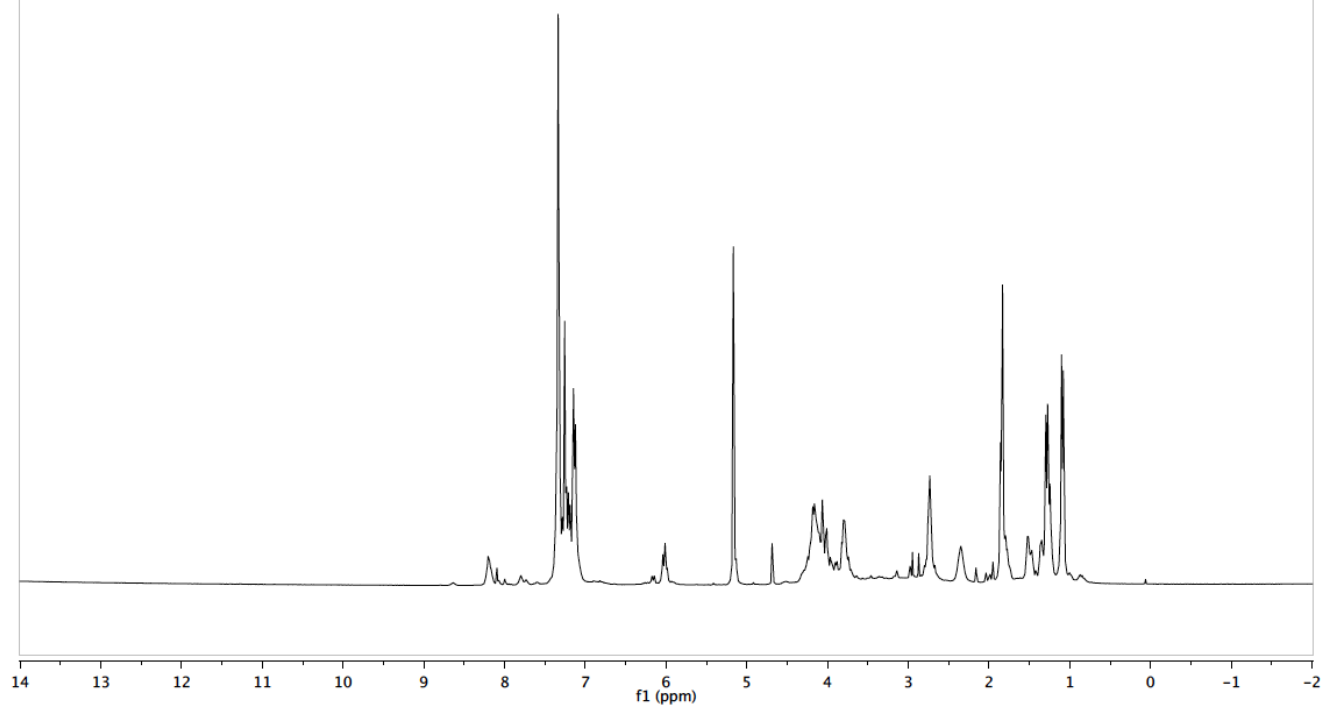

simone

28a

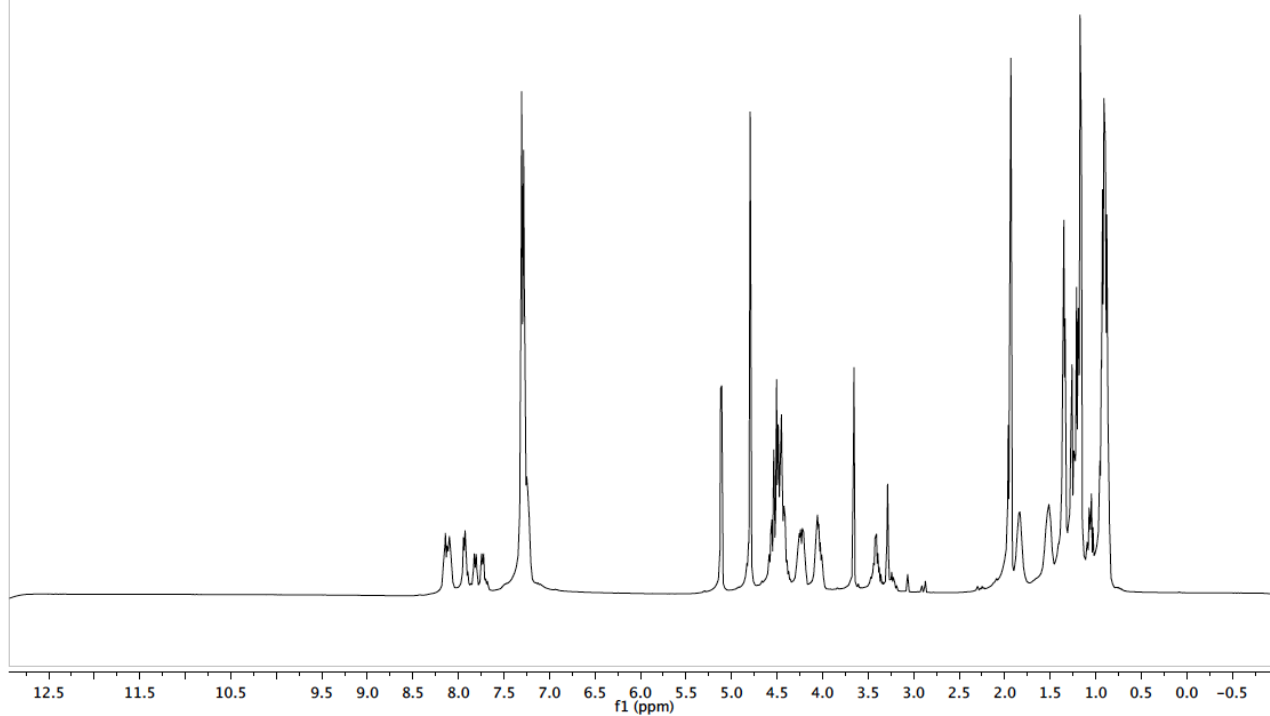

sgi339  
Std Proton parameters

28b

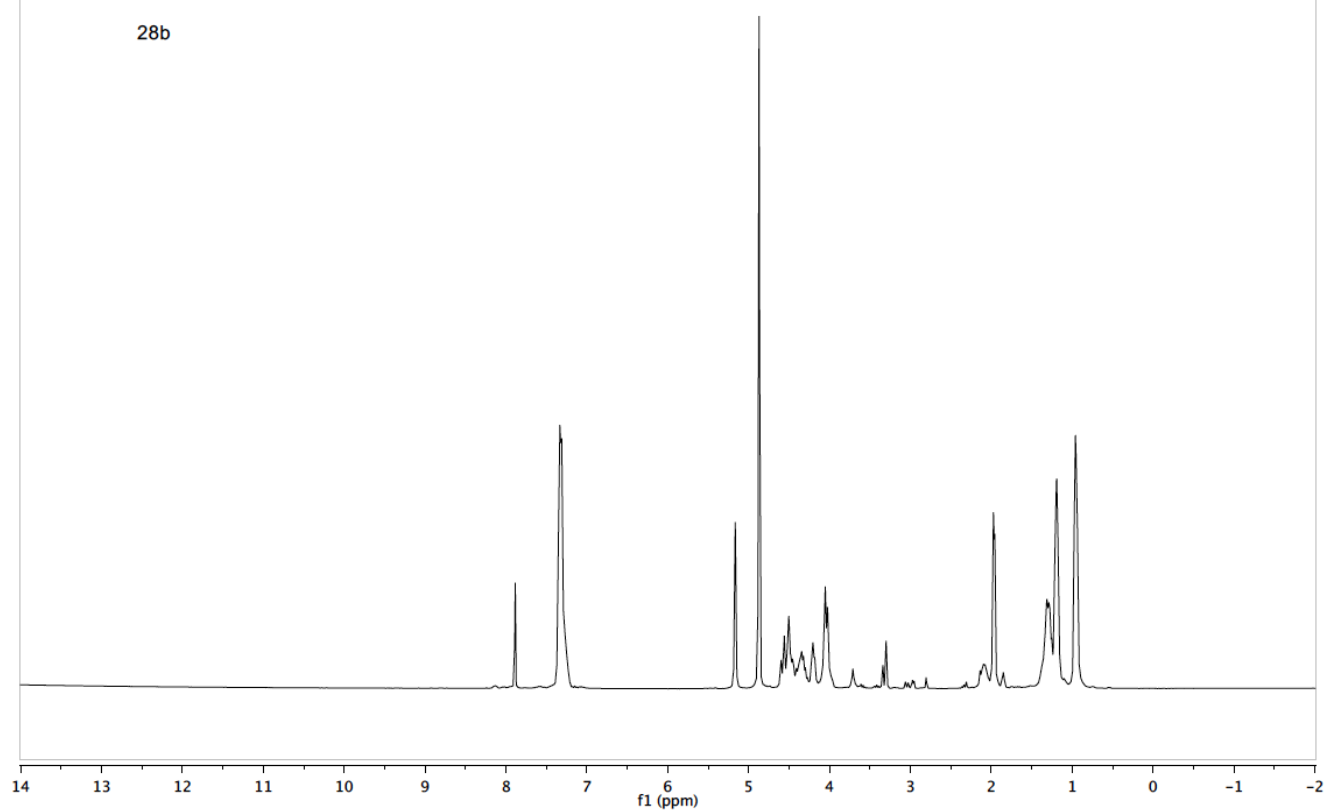

sgi338  
Std Proton parameters

28c

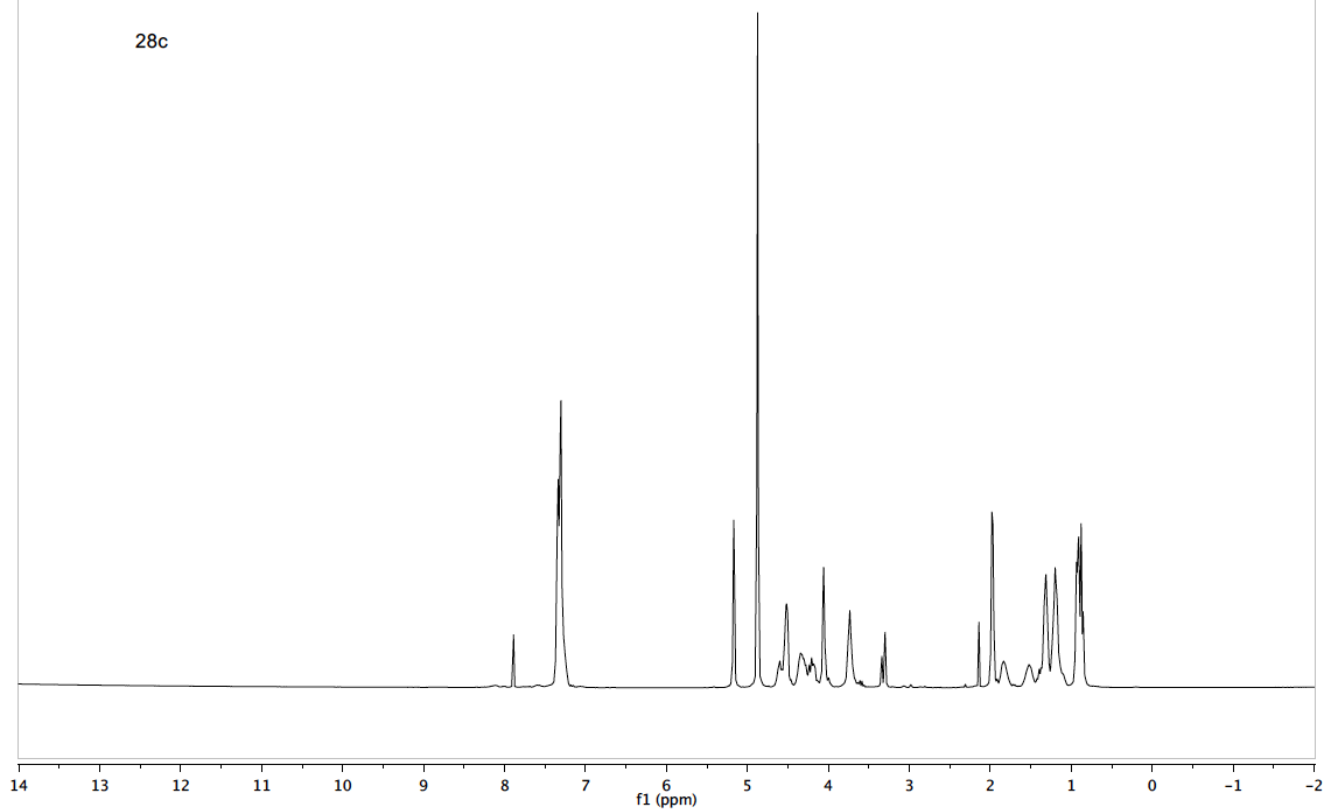

sgi474\_NF2140  
Std Proton parameters

28d

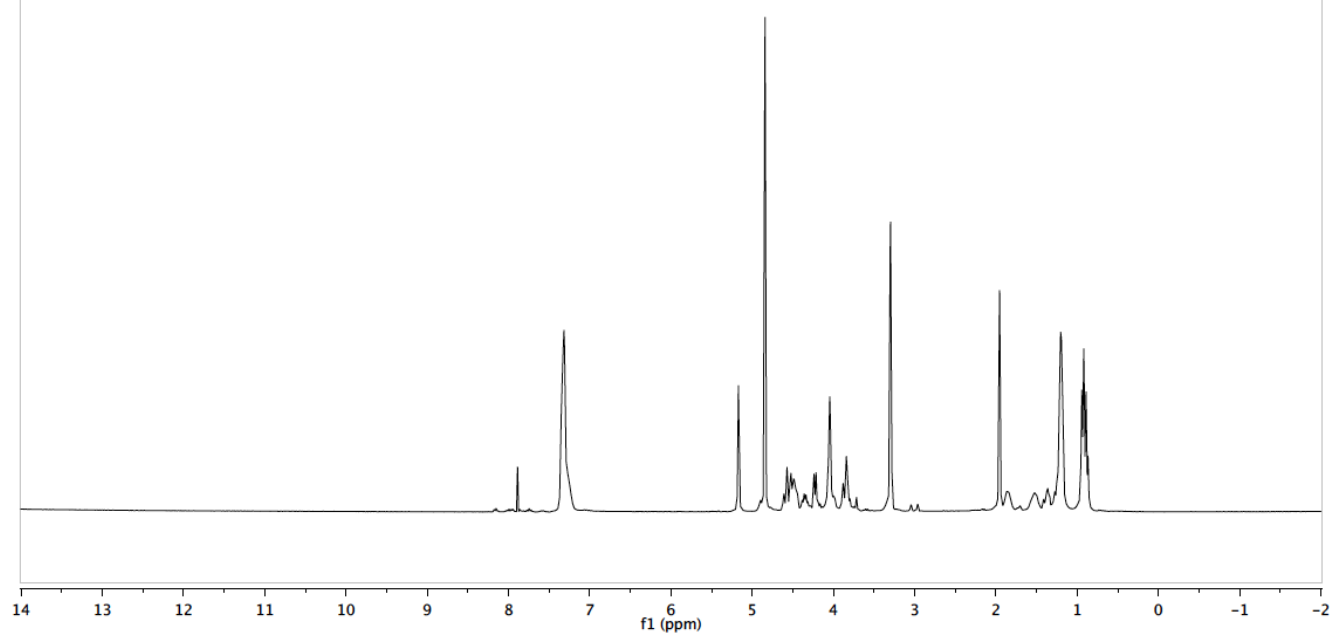

sgl309  
Std Proton parameters

28e

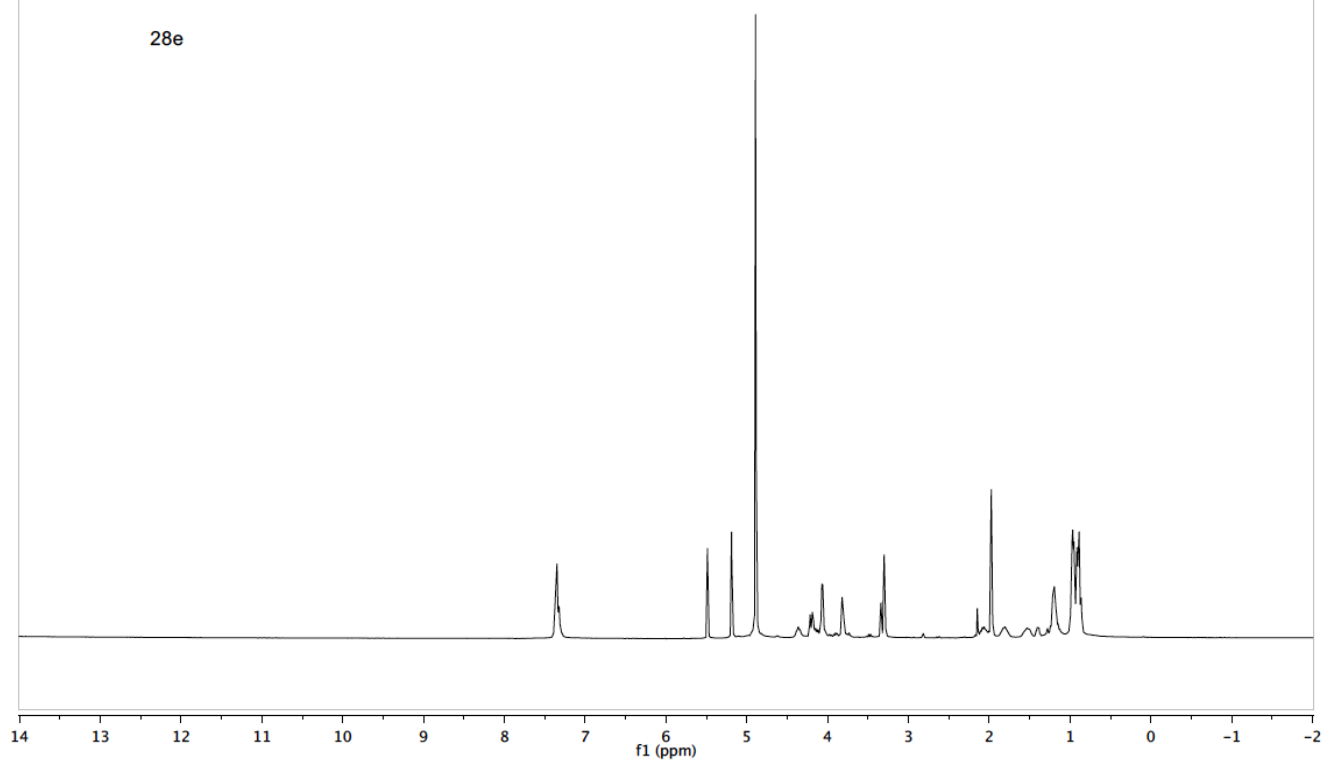

sgl462  
Std Proton parameters

28f

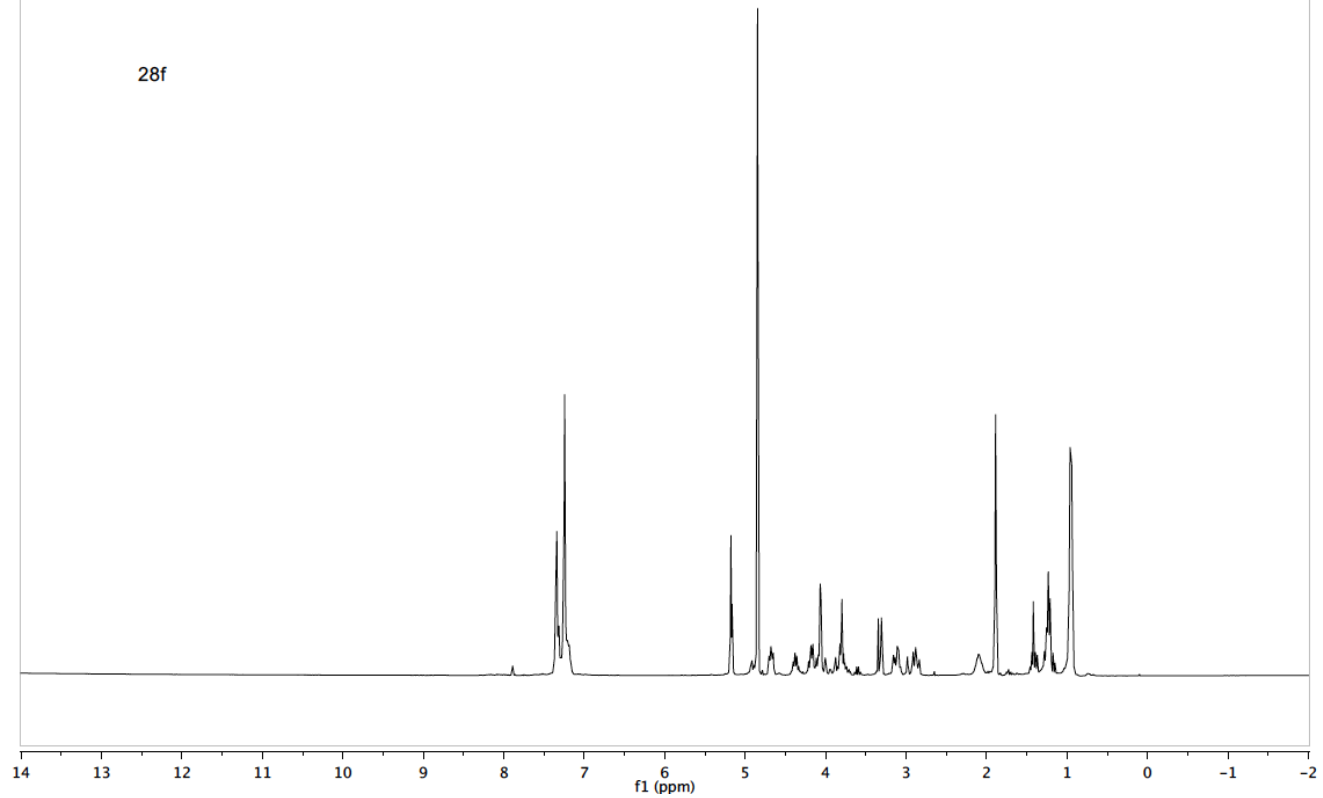

sgl366  
Std Proton parameters

28g

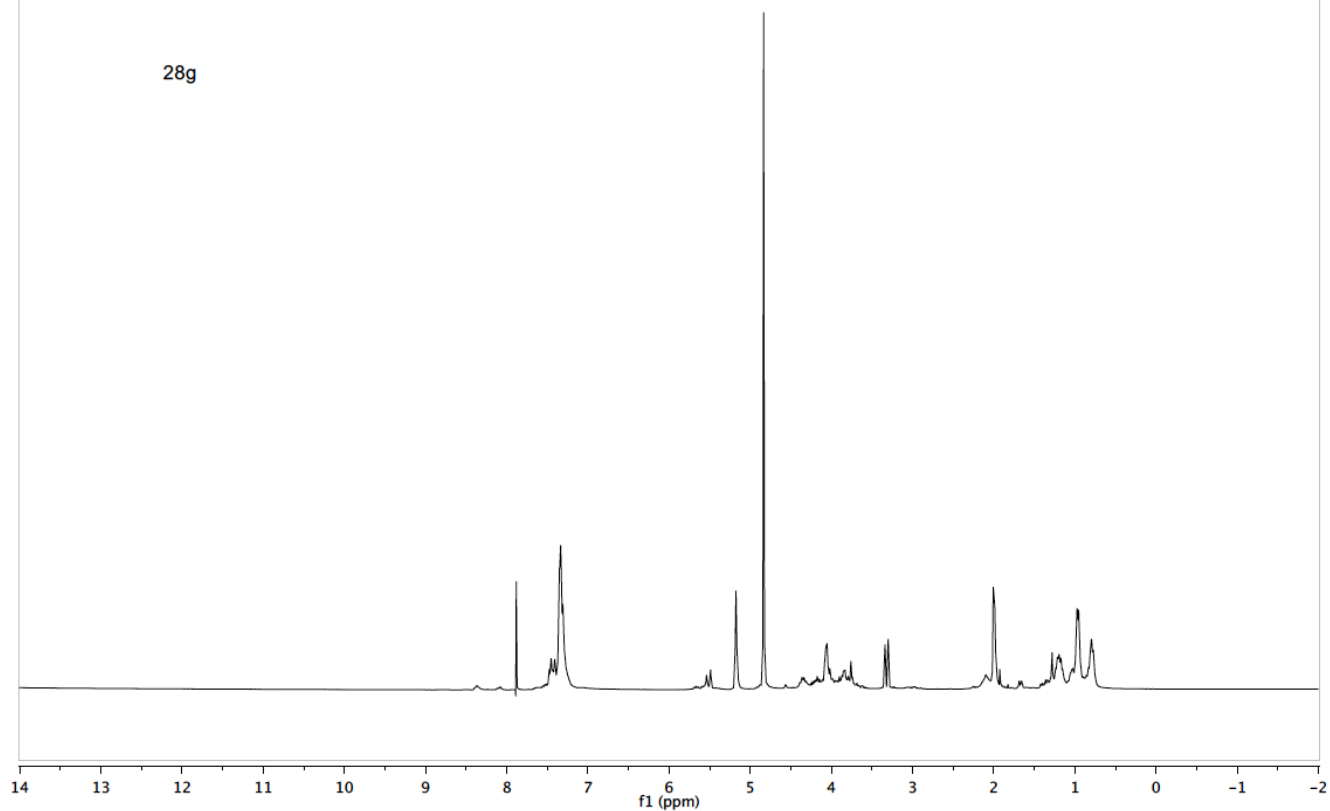

sgl428\_DMSO  
Std Proton parameters

28h

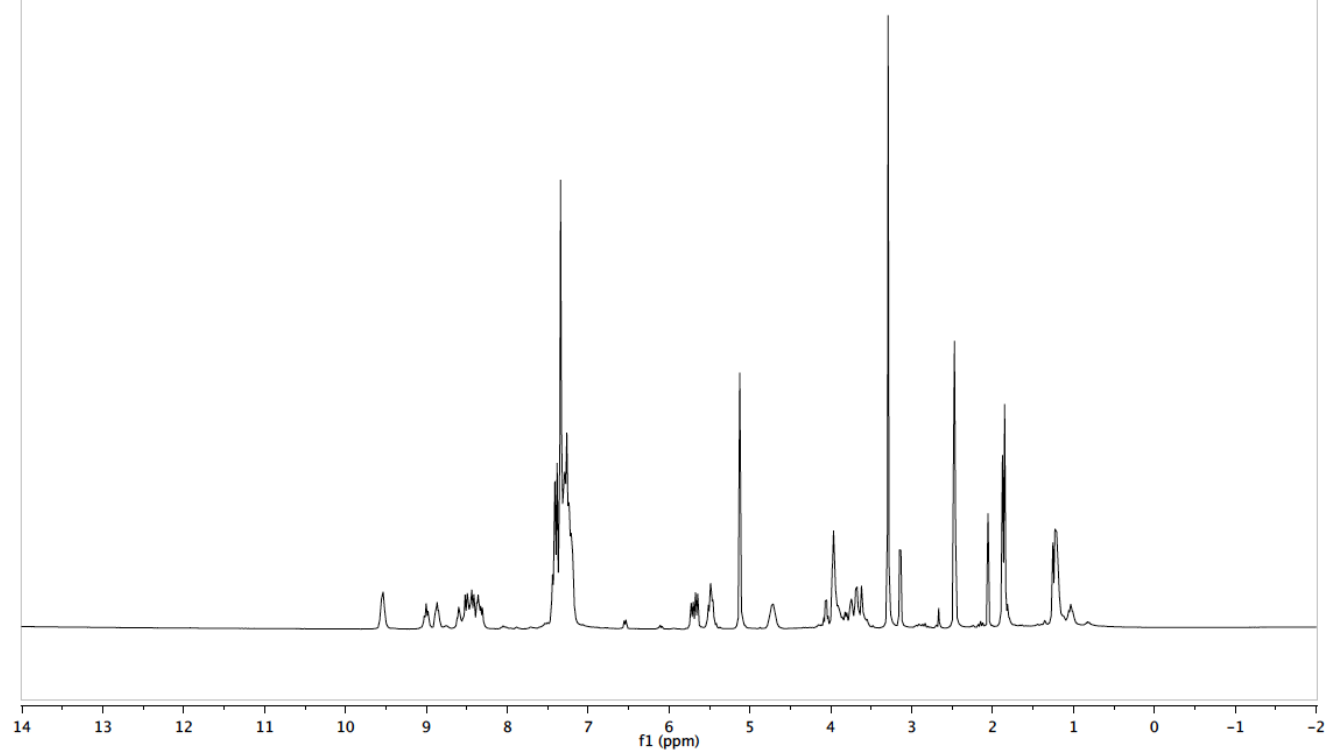

sgl426  
Std Proton parameters

28i

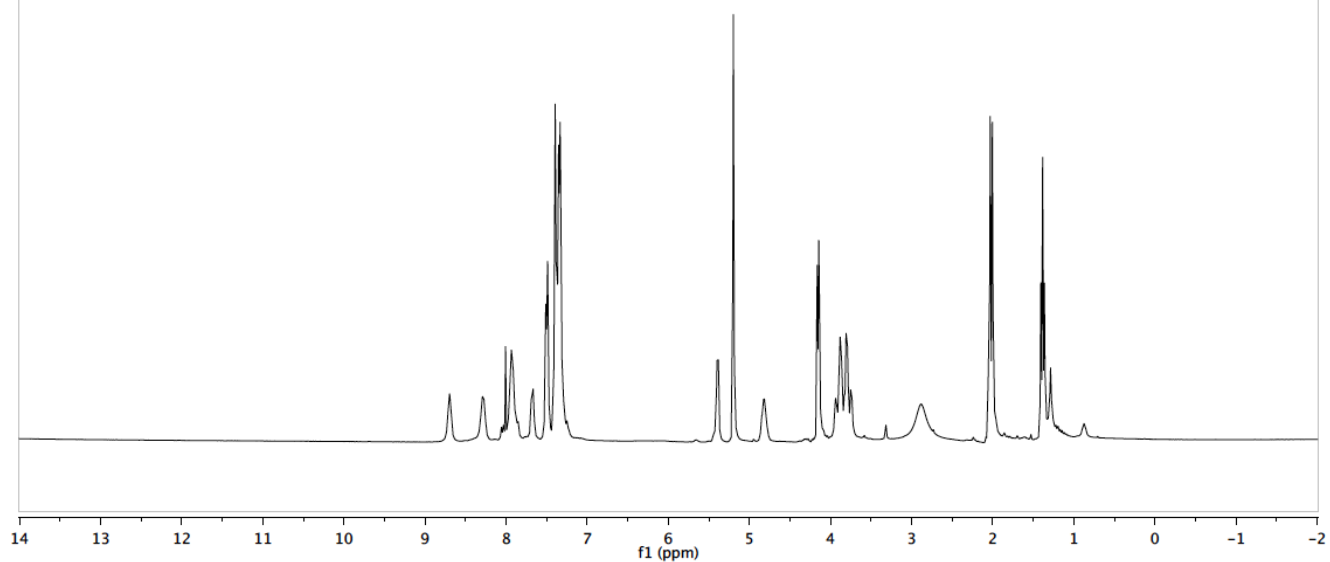

sgl427  
Std Proton parameters

28j

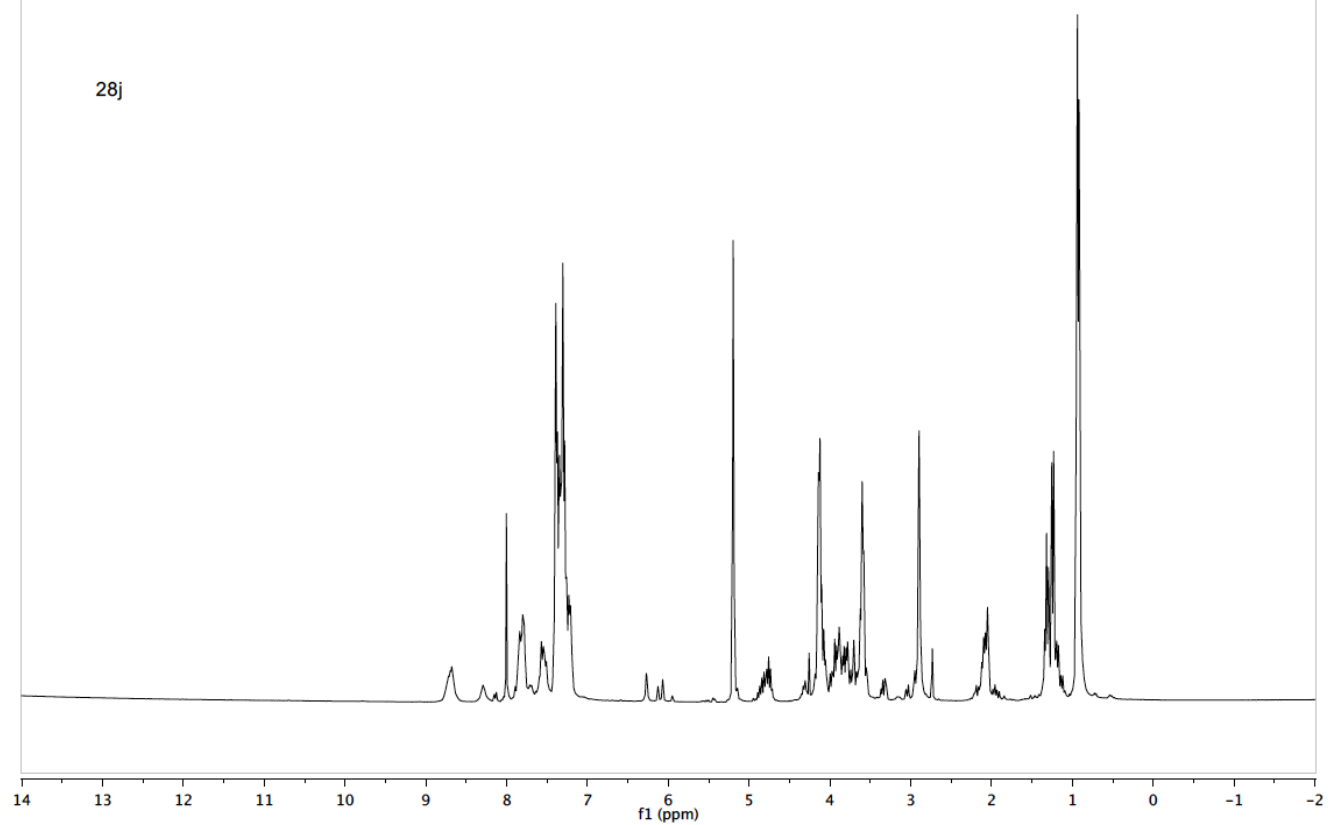

sgl419  
Std Proton parameters

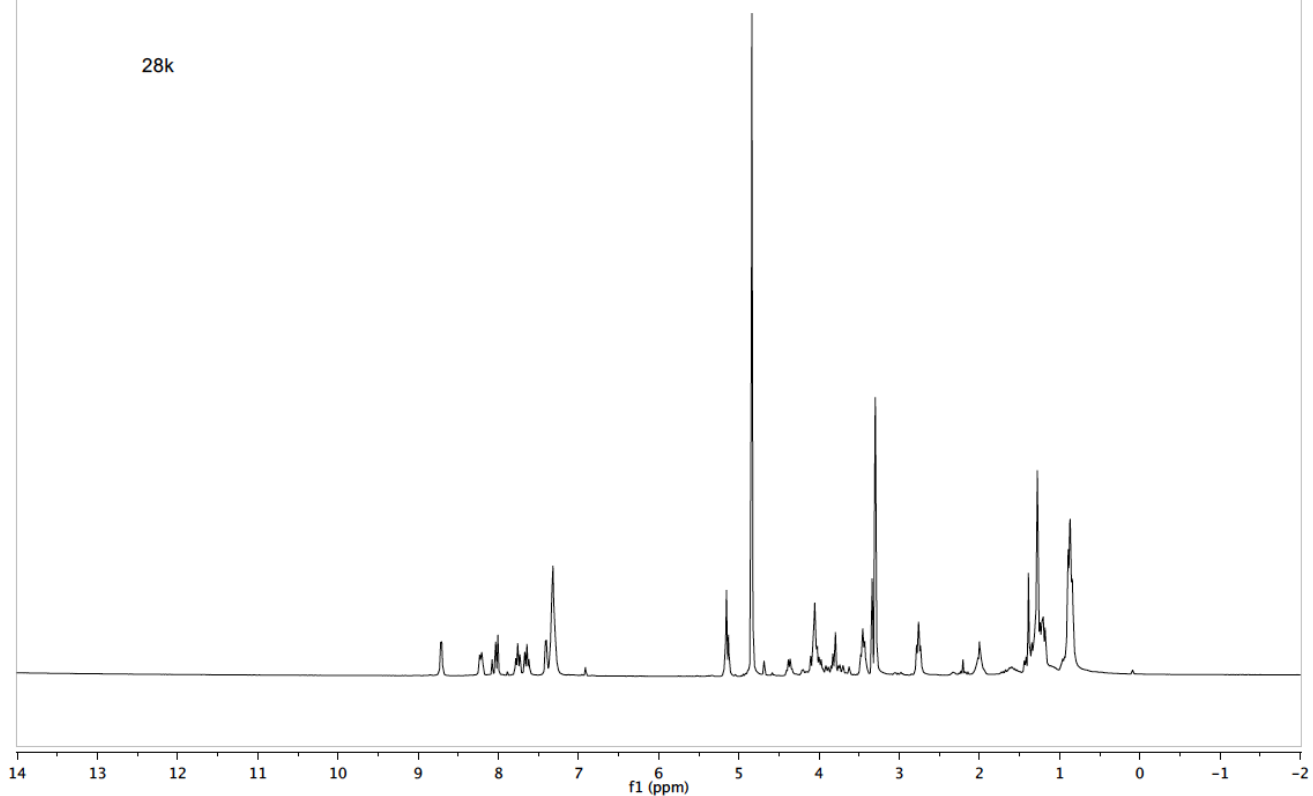

sgl449  
Std Proton parameters

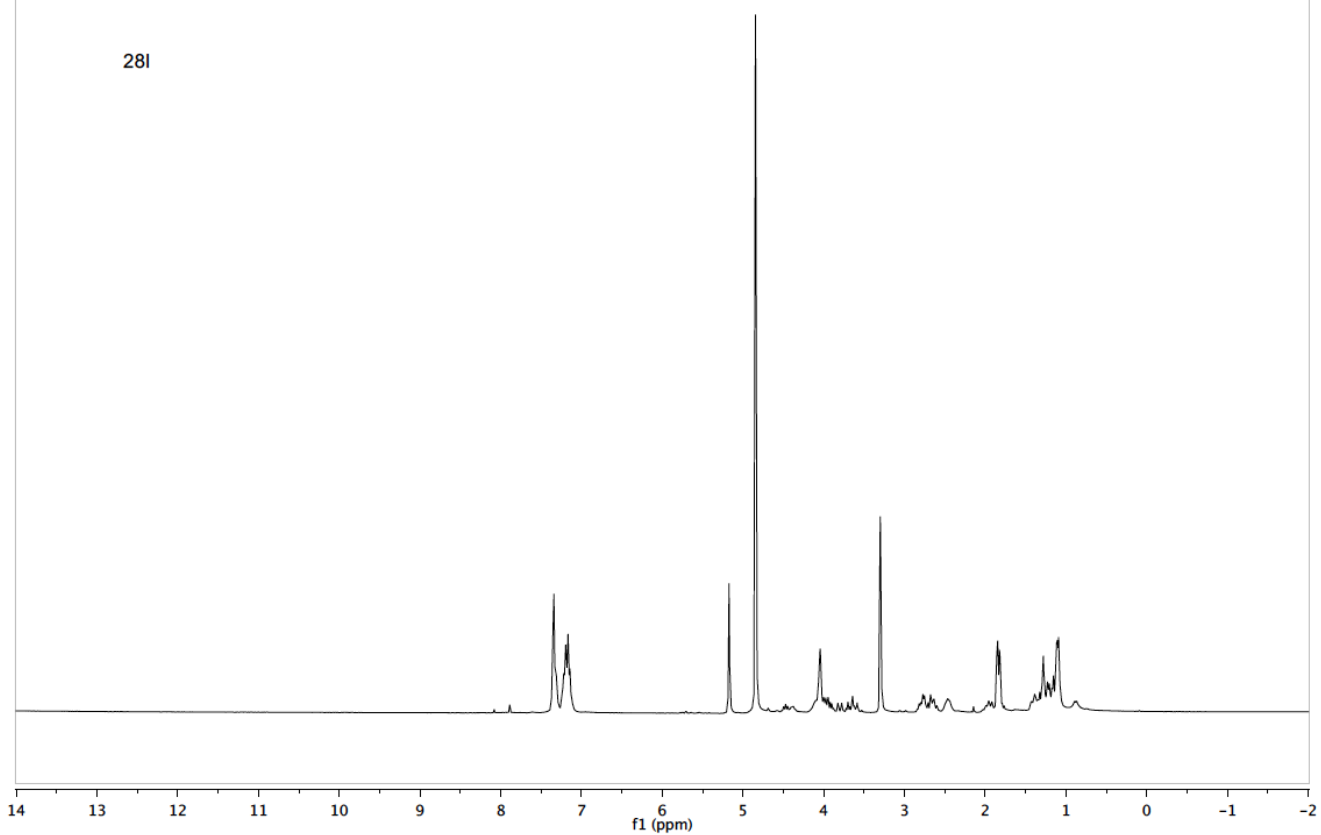



sgi450  
Std Proton parameters

28m

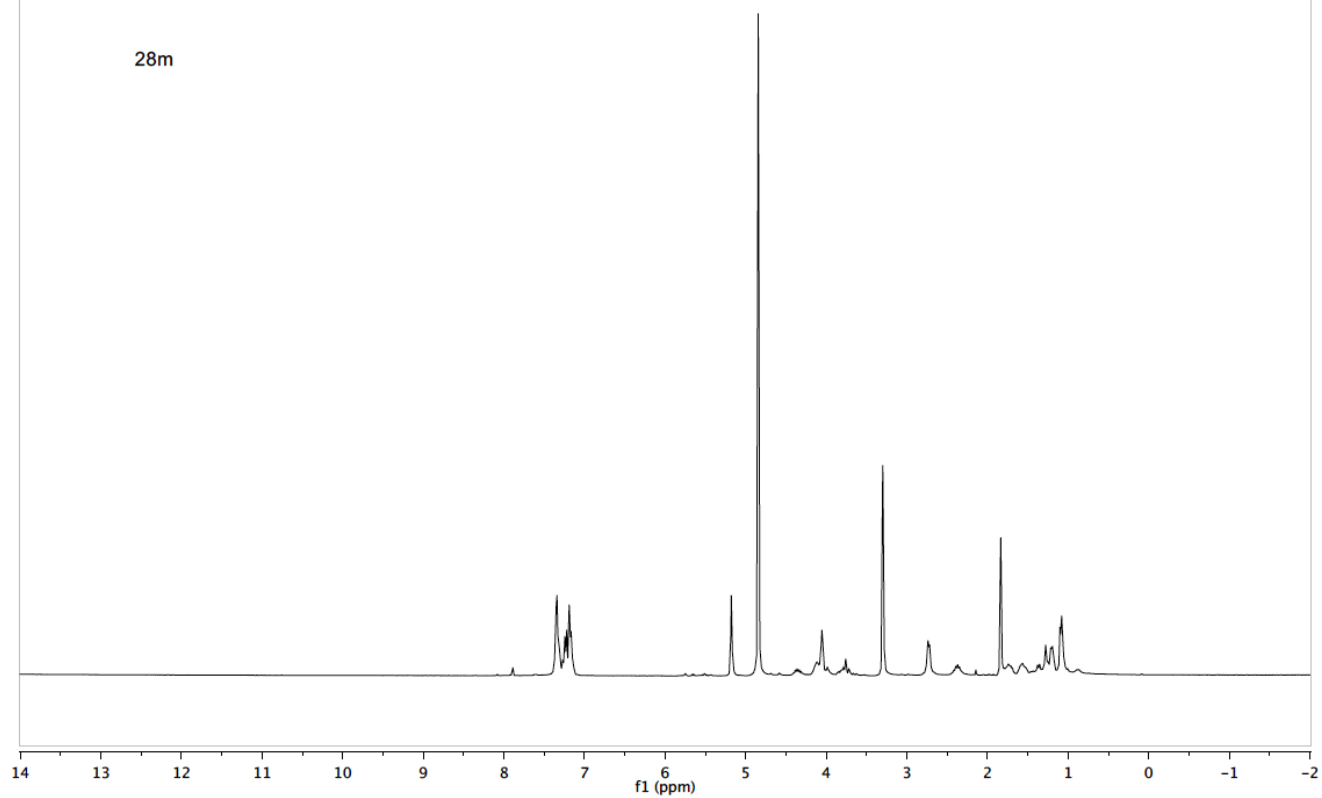

sgi346  
Std Proton parameters

4

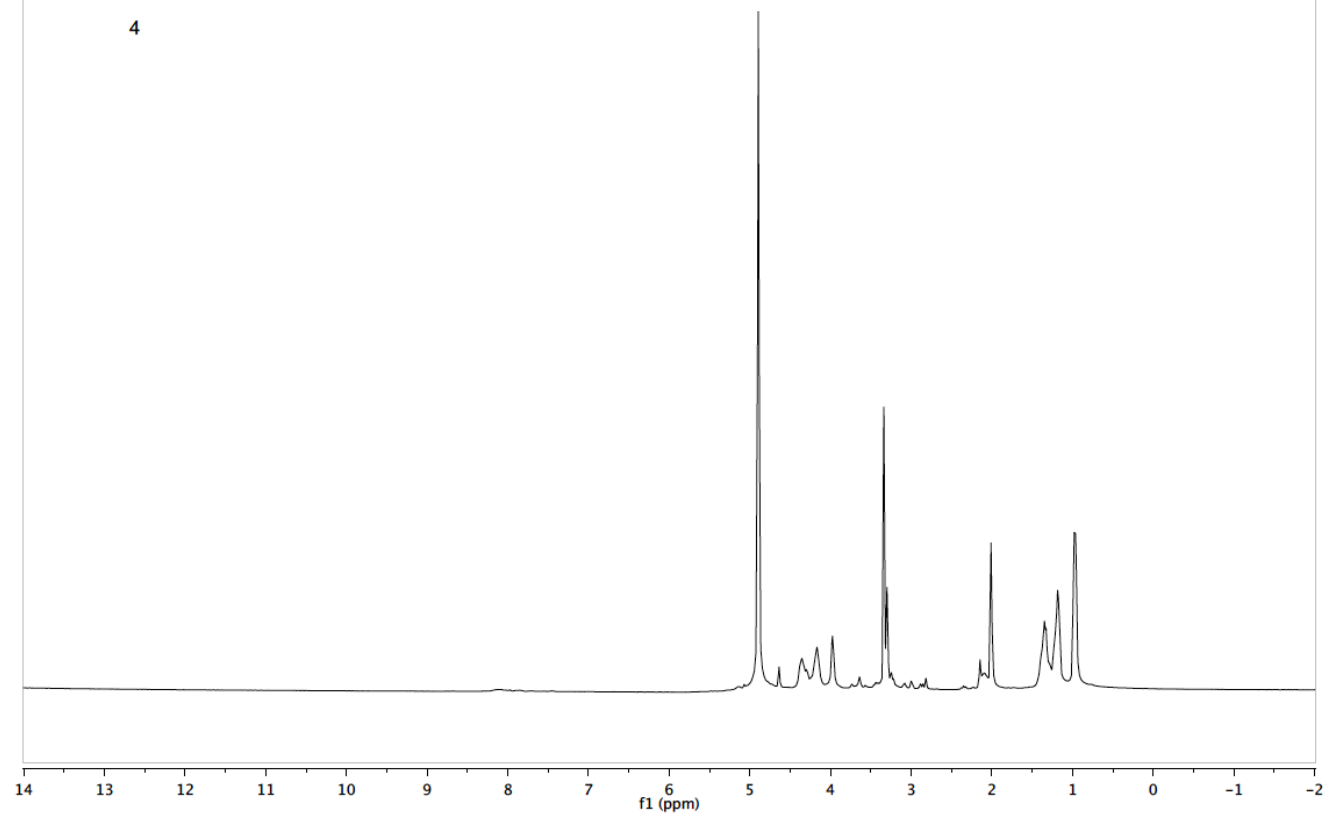

sgl347  
Std Proton parameters

5

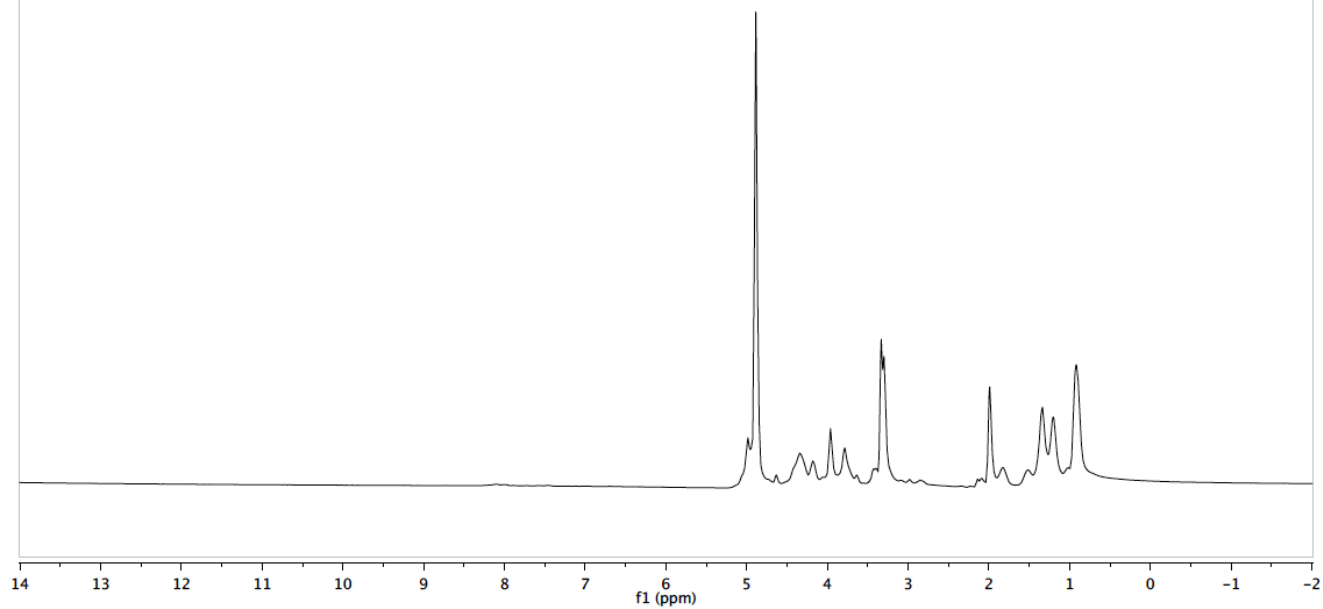

simone

6

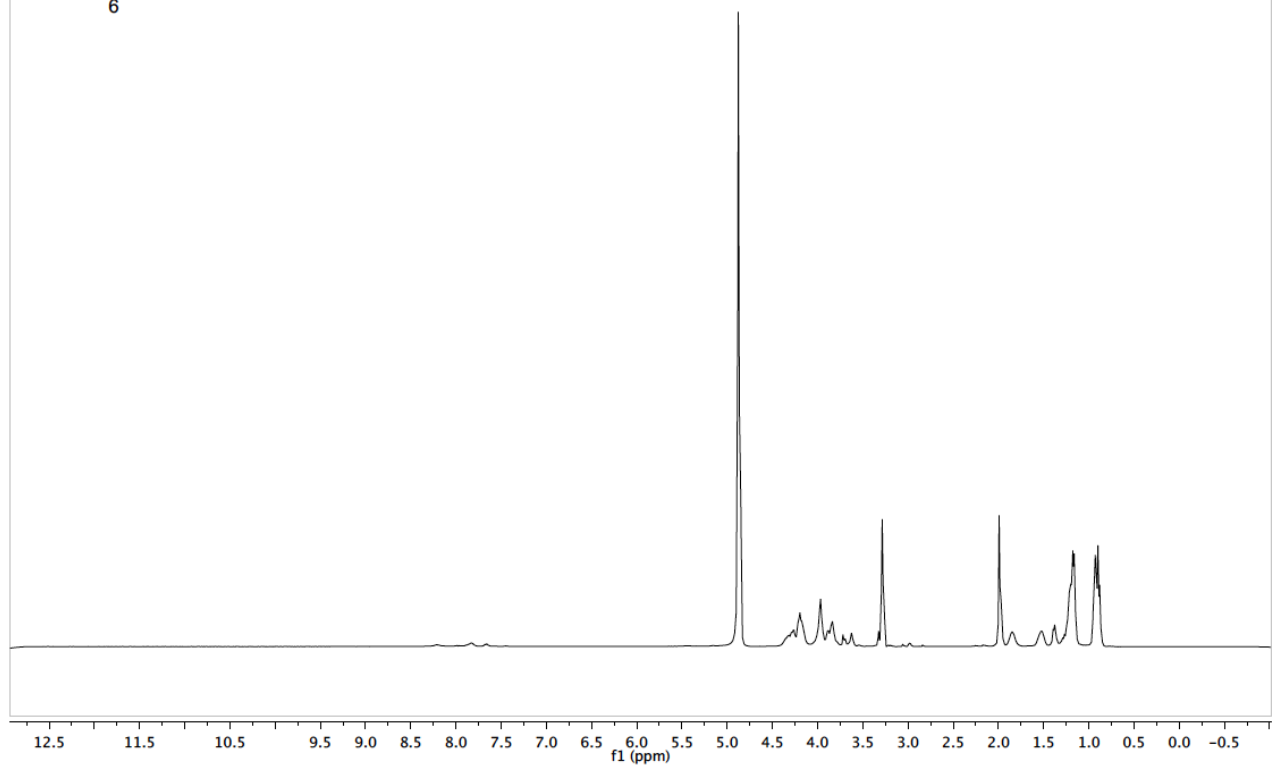

sgl406  
Std Proton parameters

7

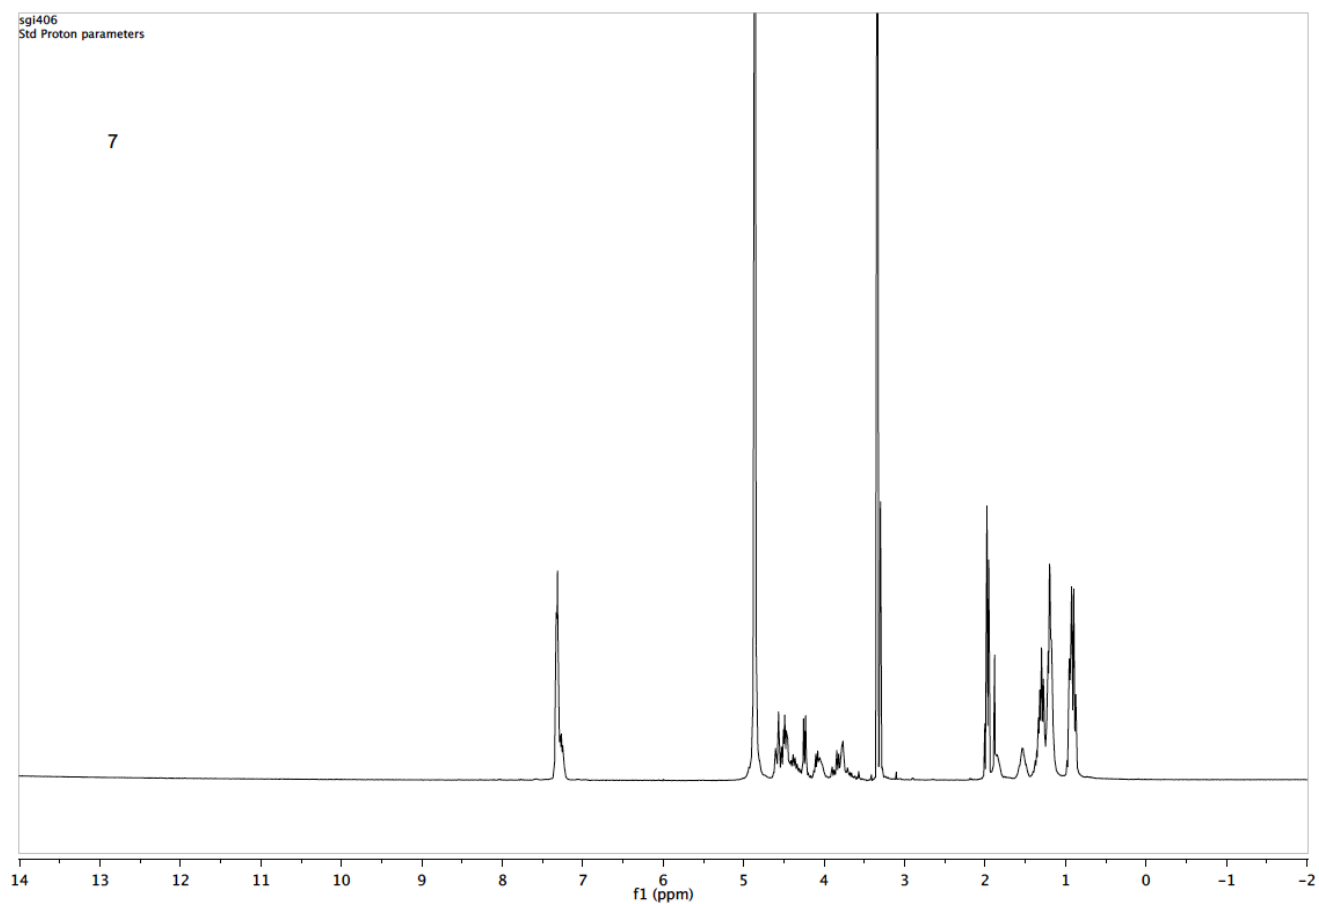

sgl344  
Std Proton parameters

8

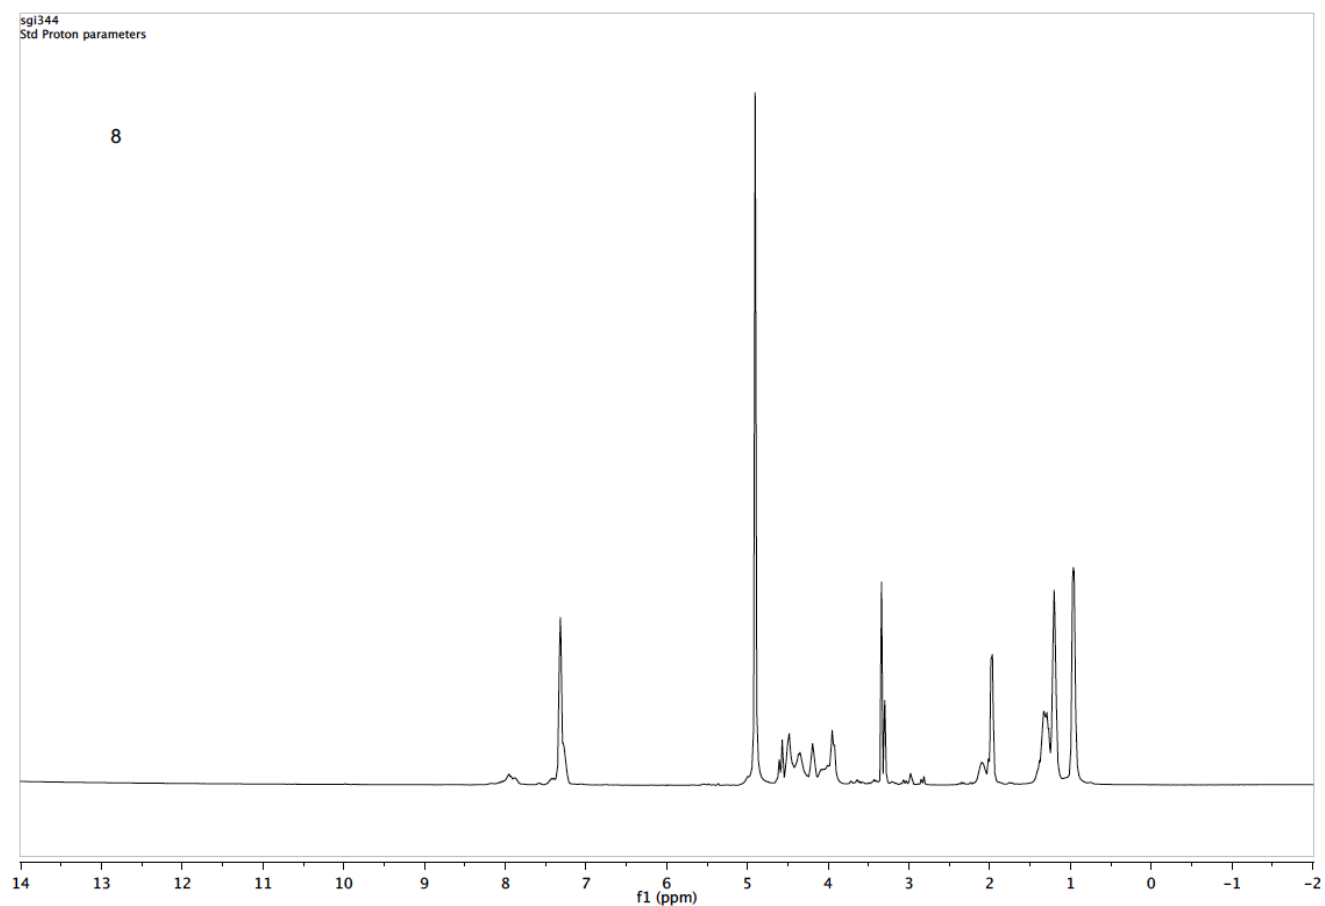

sgl343  
Std Proton parameters

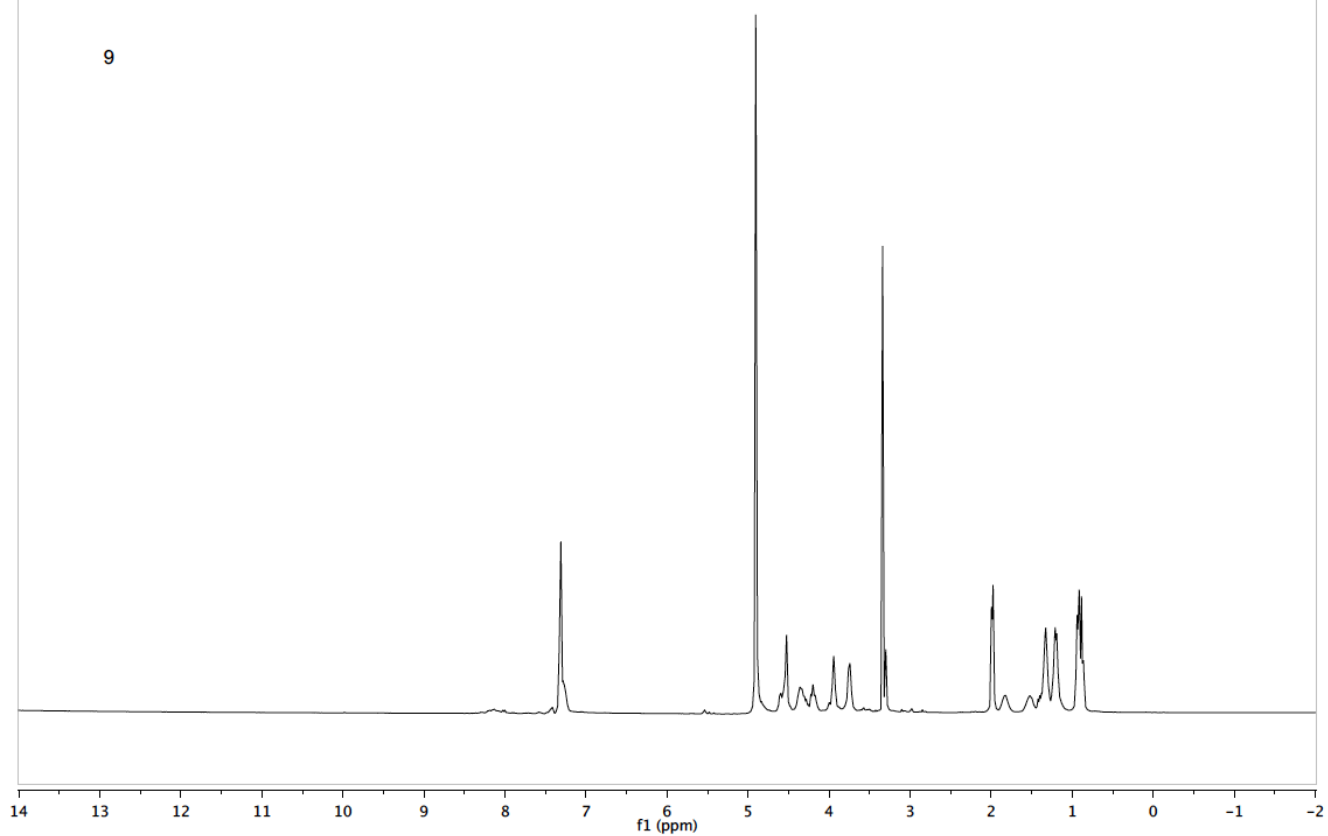

sgl465  
Std Proton parameters

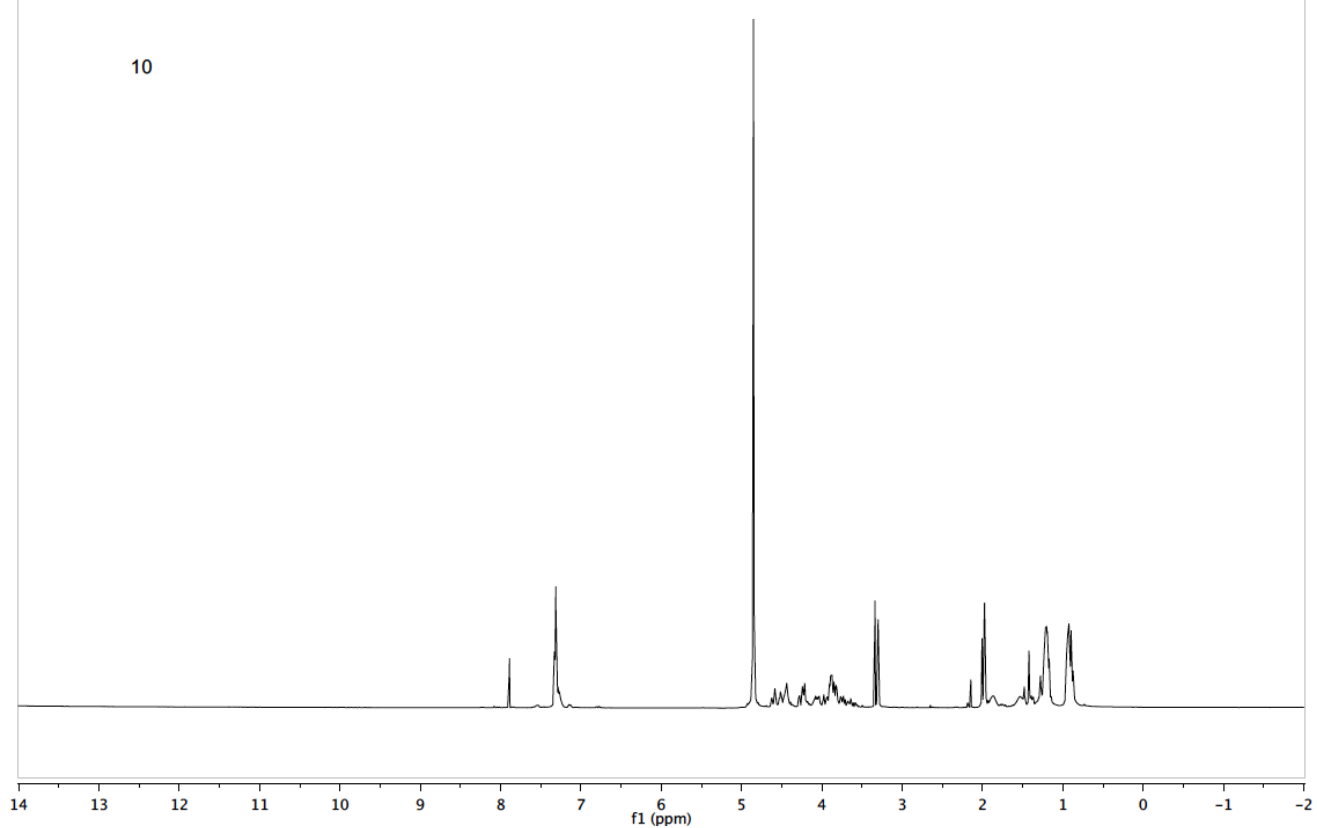

sgi310.2  
Std Proton parameters

11

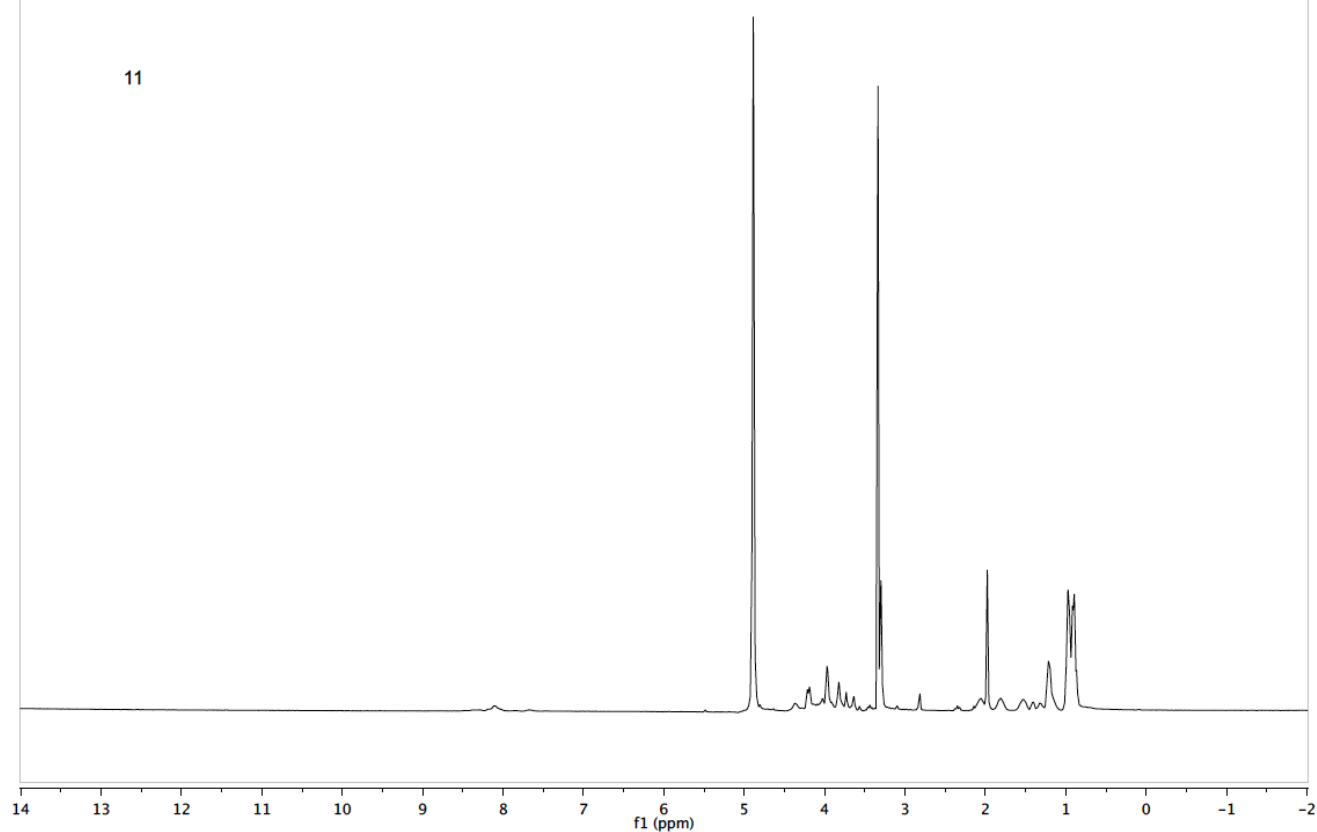

sgi463  
Std Proton parameters

12

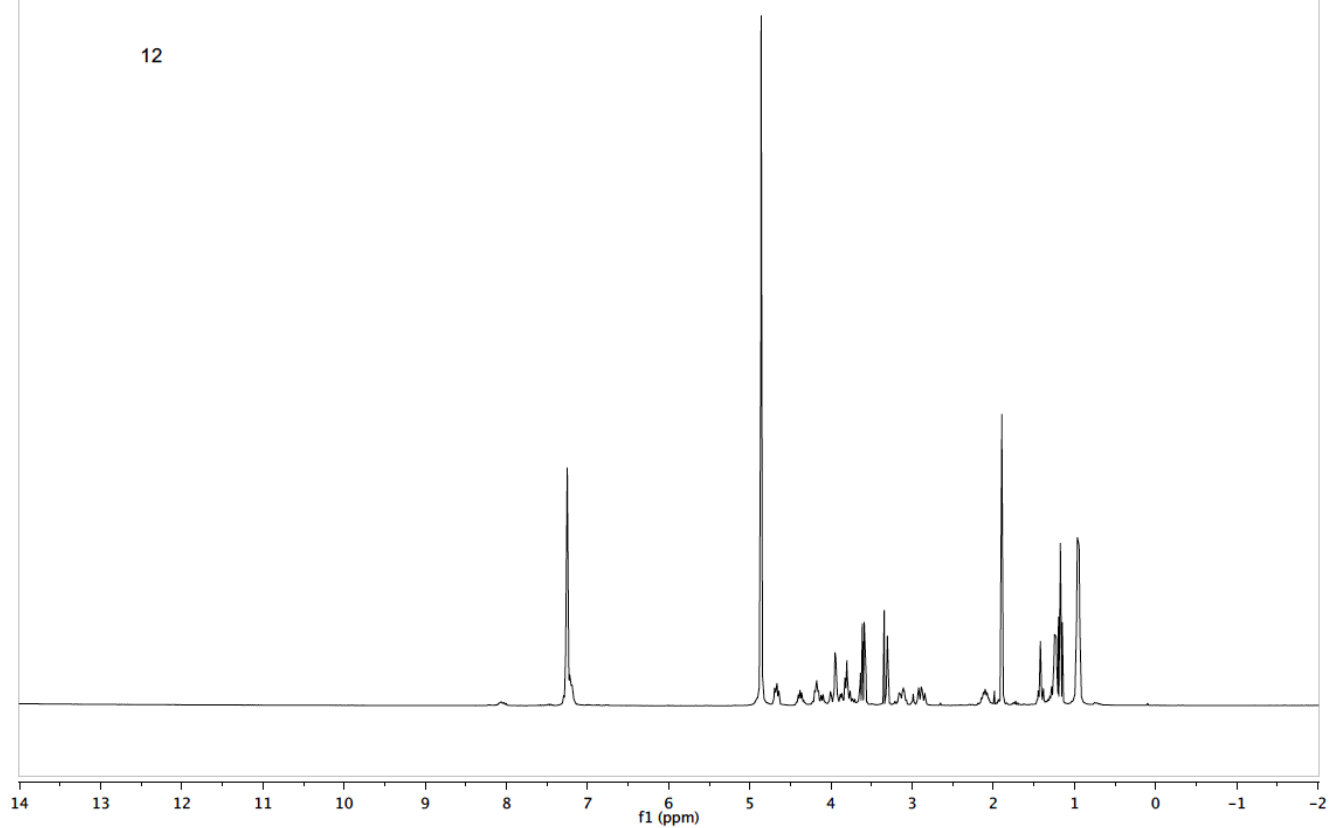

sgl368  
Std Proton parameters

13

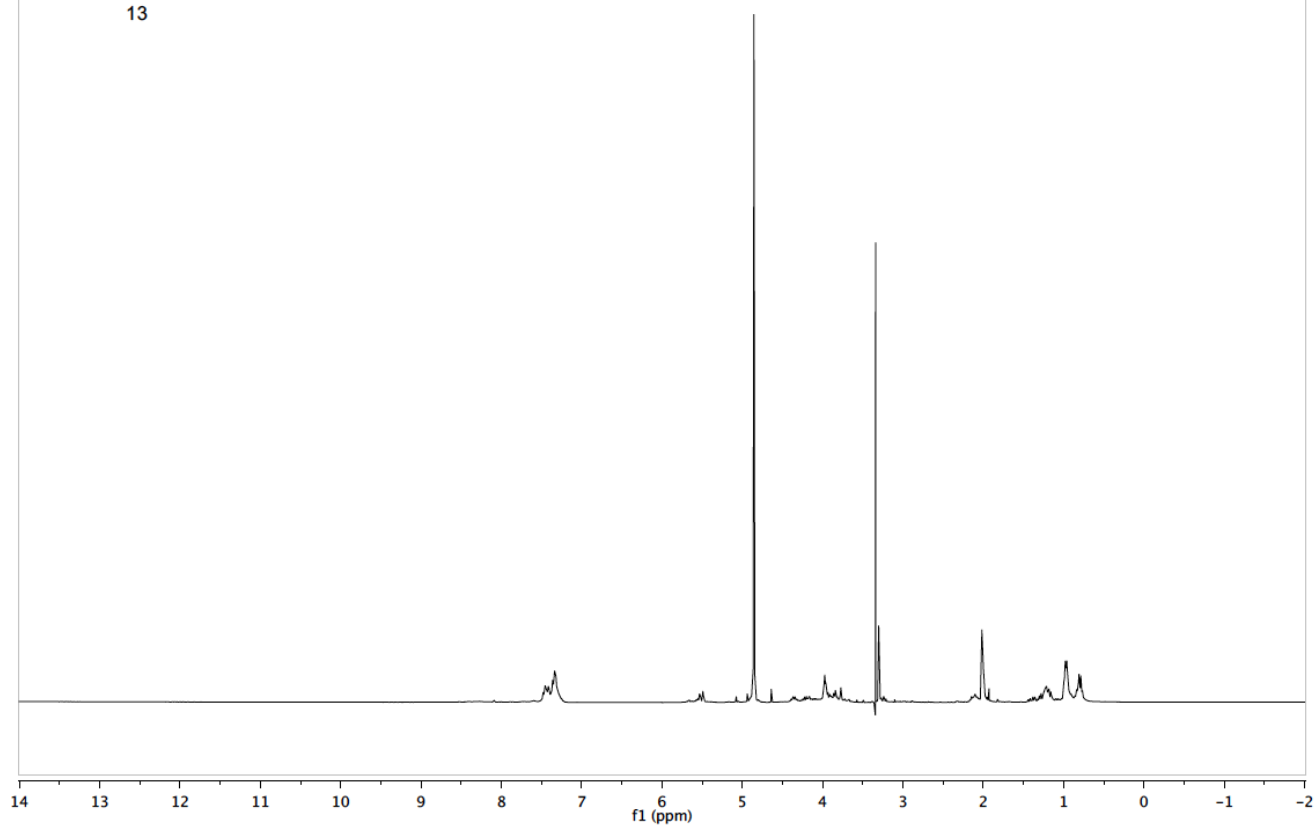

sgl431  
Std Proton parameters

14

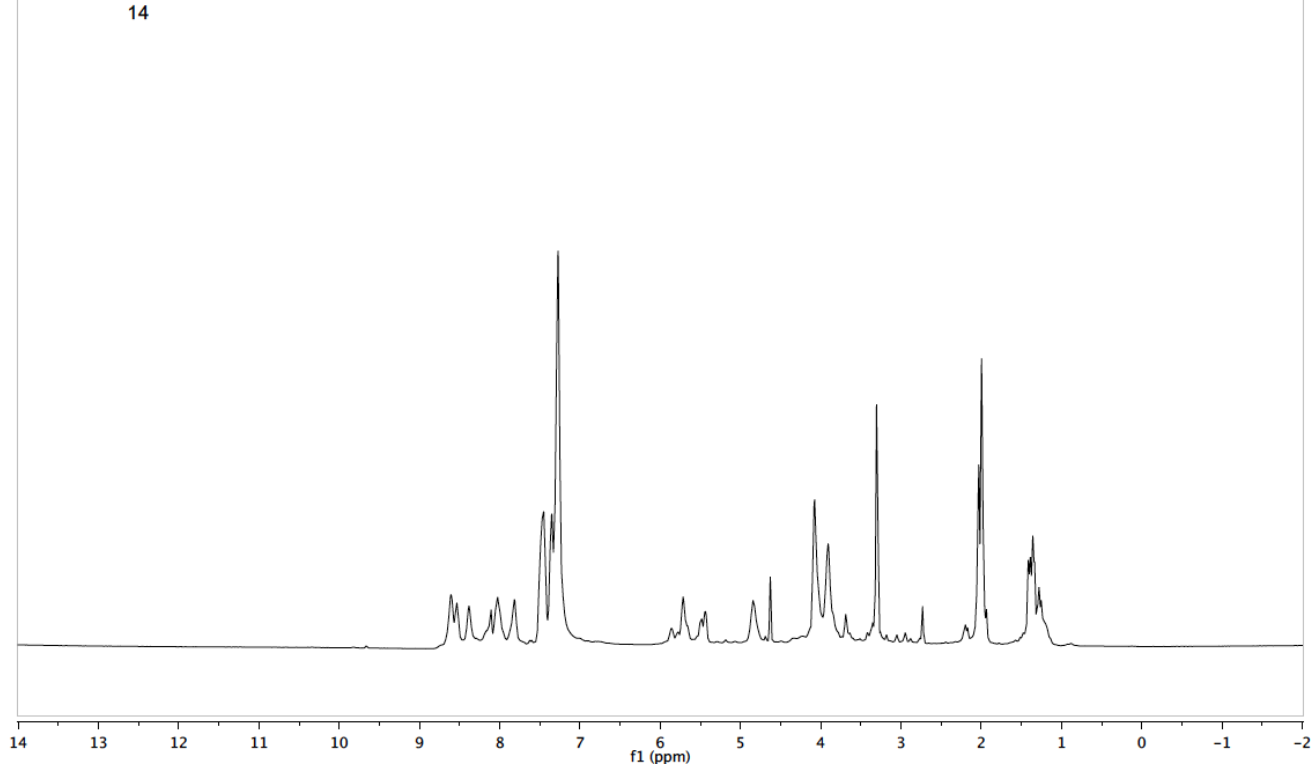

sgl429  
Std Proton parameters

15

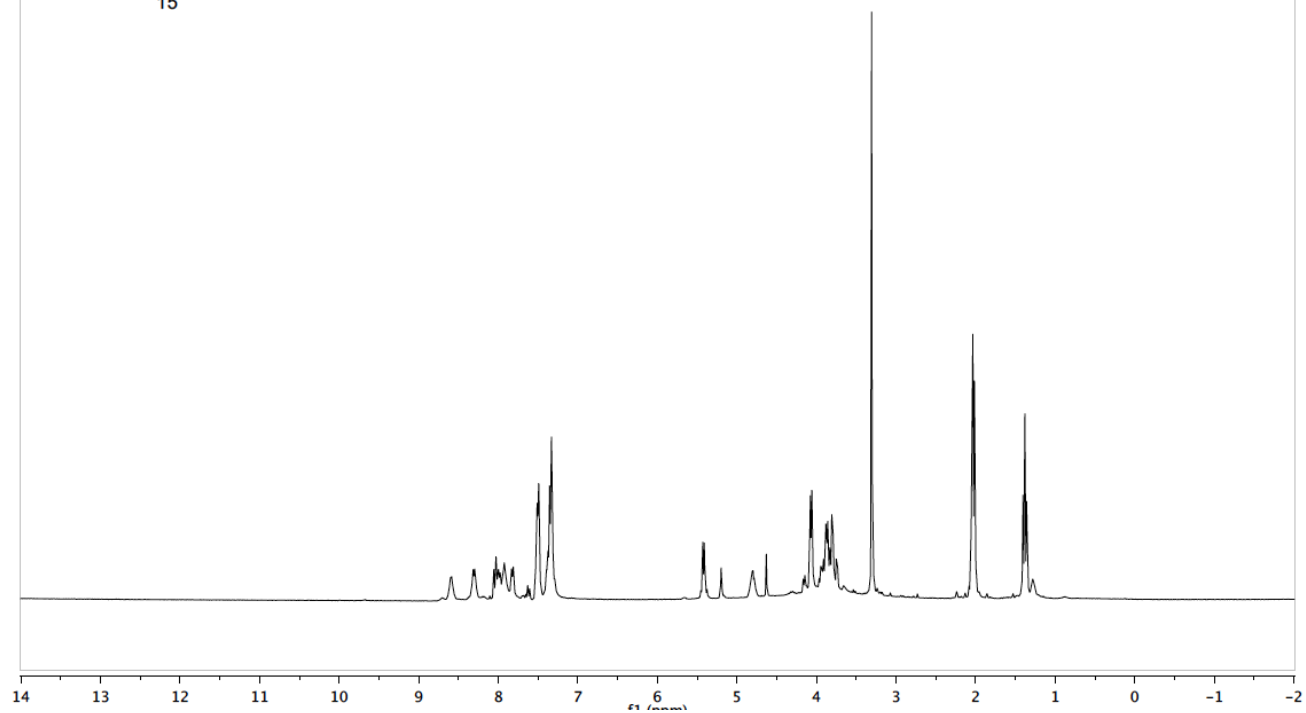

sgl430  
Std Proton parameters

16

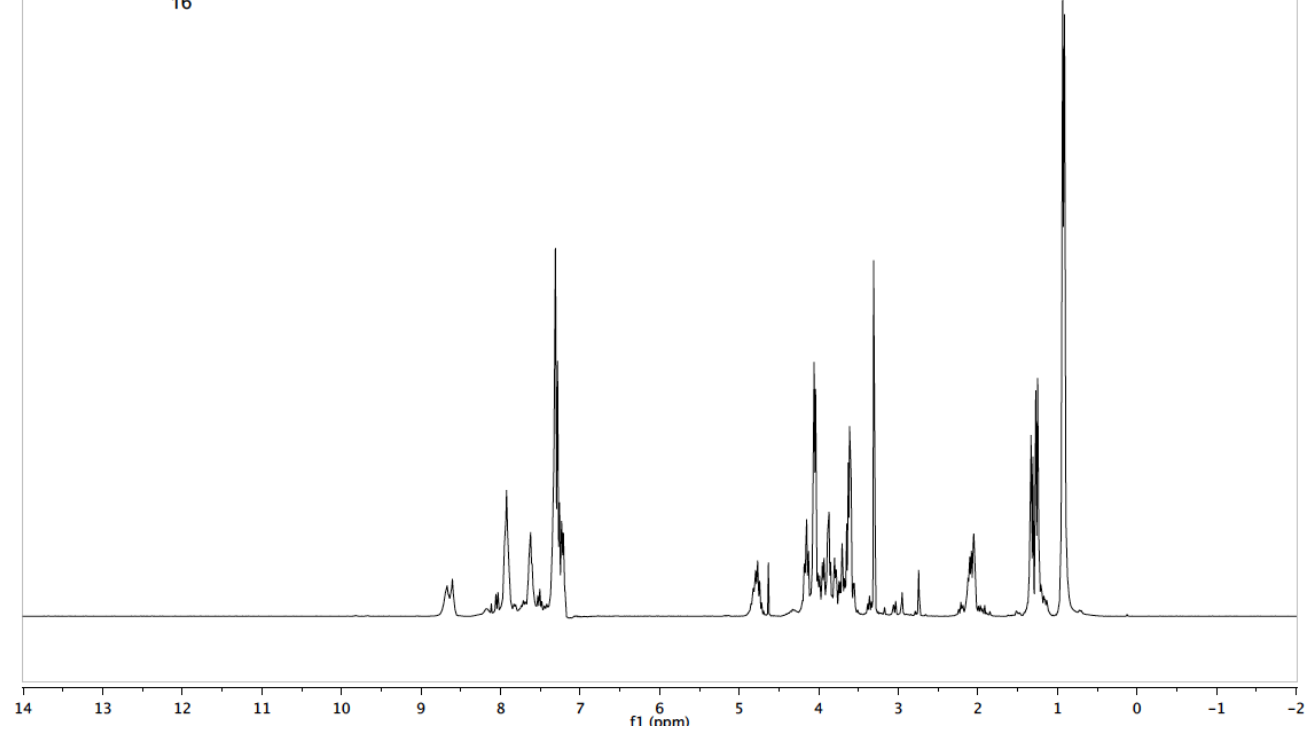

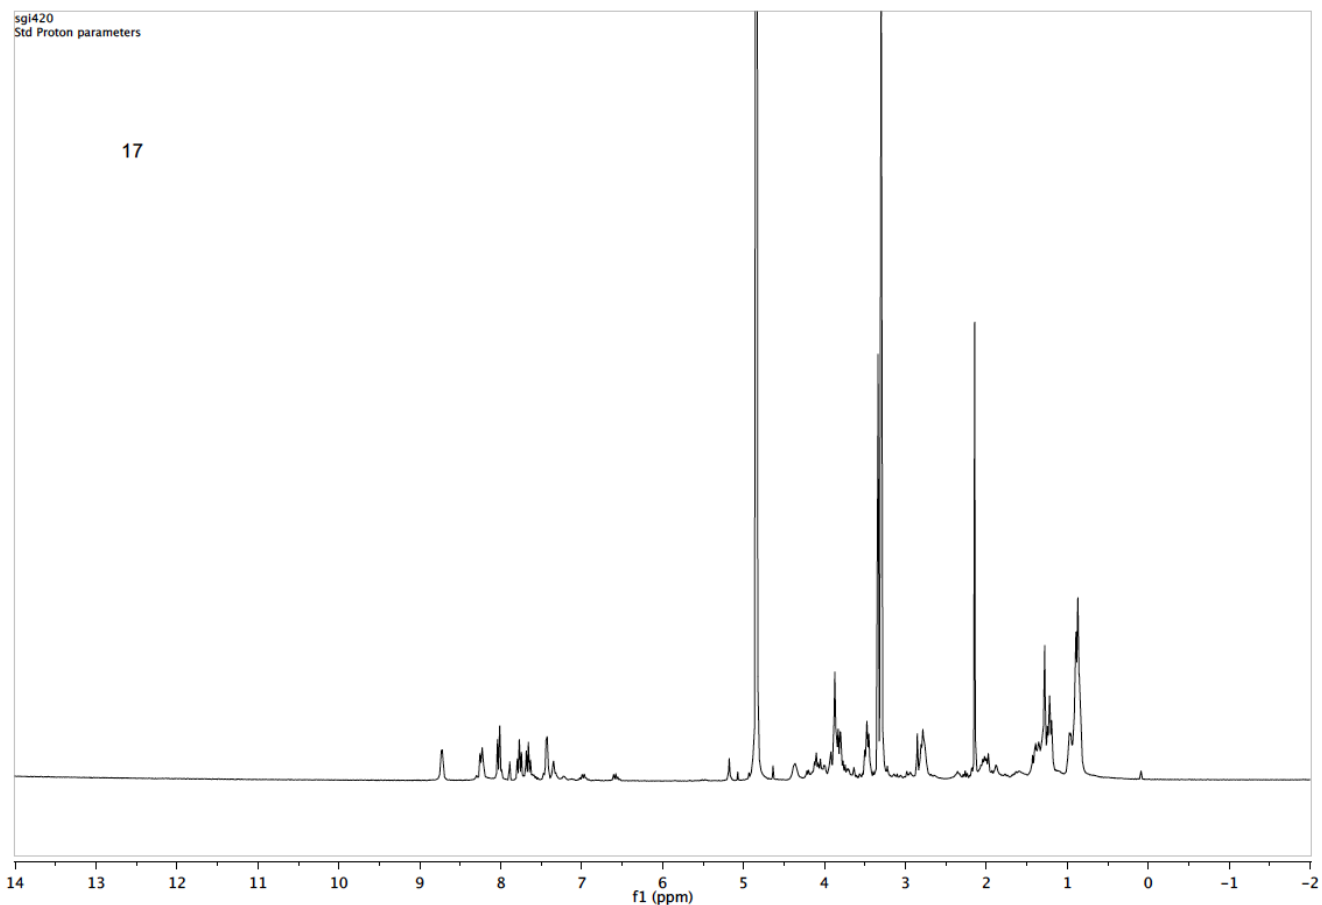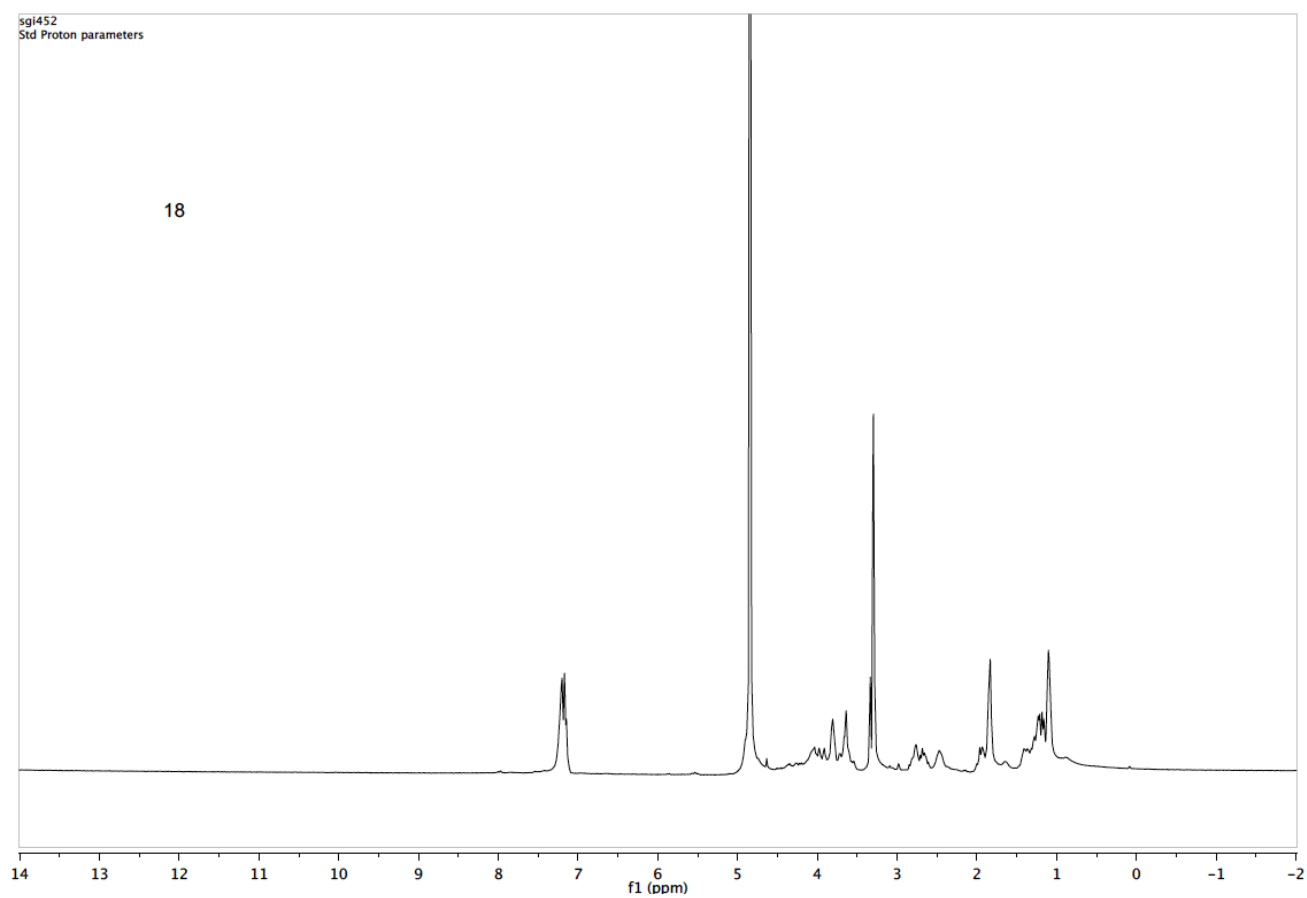



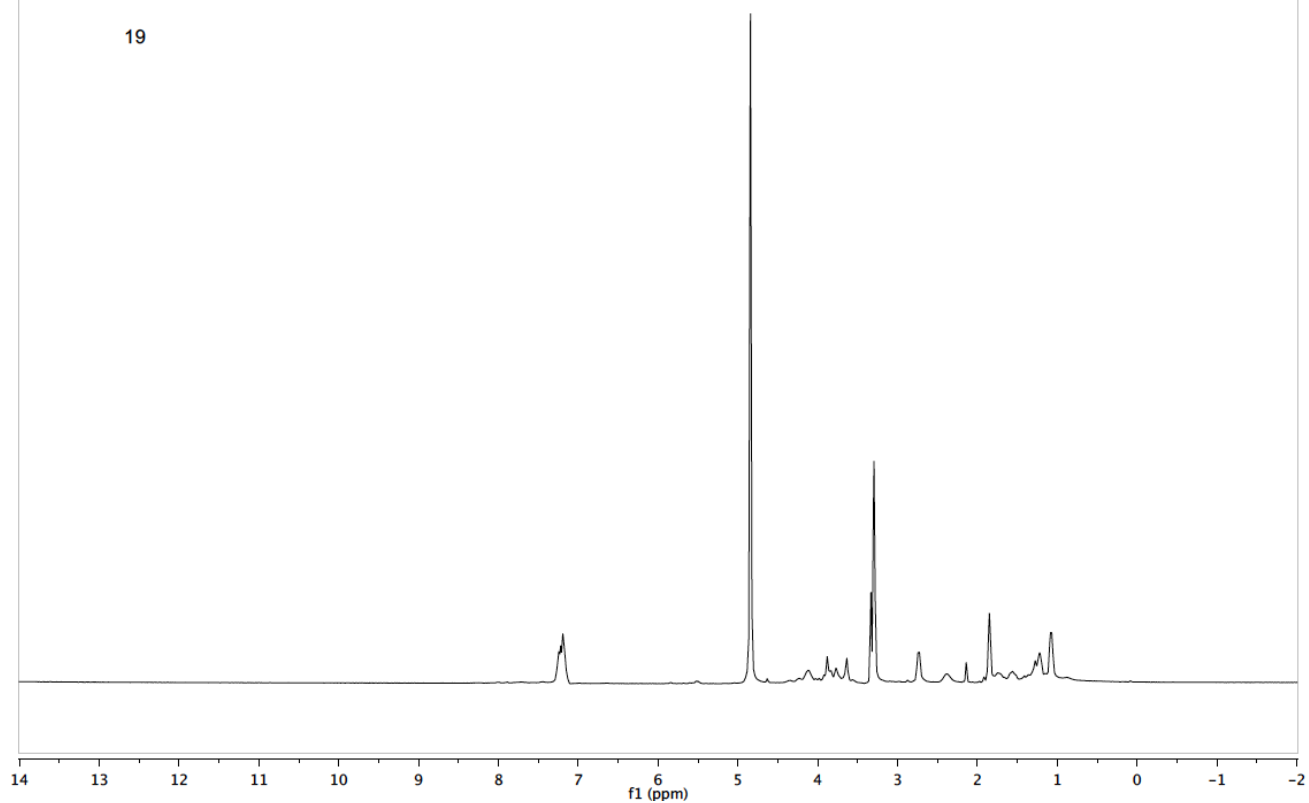

Supplement: c5ra01170a1.pdf [file c5ra01170a1.pdf]
